# Supplementary material for: Preparation of Deuterium Labeled Compounds by Pd/C-Al-D2O Facilitated Selective H-D Exchange Reactions
Source: MDPI journal article supplement (doi:10.3390/molecules27030614), 2022-01-18
Supplement: s1 [file s1]

## **Supporting Information**

Preparation of deuterium labeled compounds by Pd/C-Al-D<sub>2</sub>O facilitated  
selective H-D exchange reactions

# Table of content

|                                                                |       |
|----------------------------------------------------------------|-------|
| <b>D<sub>2</sub> gas production experiment (Fig. S1)</b> ..... | p.1,2 |
|----------------------------------------------------------------|-------|

|                                                                                                                            |       |
|----------------------------------------------------------------------------------------------------------------------------|-------|
| <b>Calibration of the quantitative determination of hydrogen content method in <sup>1</sup>H NMR (Fig. S2 and 3)</b> ..... | p.3,4 |
|----------------------------------------------------------------------------------------------------------------------------|-------|

## **Optimization of the reaction conditions**

|                                                                                         |      |
|-----------------------------------------------------------------------------------------|------|
| H-D exchange of phenylalanine for 24h at 80°C under conventional heating (Fig. S4)..... | p.5  |
| H-D exchange of phenylalanine for 1h under MW at 80°C (Fig. S5).....                    | p.6  |
| H-D exchange of phenylalanine for 1h under MW at 100°C (Fig. S6) .....                  | p.7  |
| H-D exchange of phenylalanine for 1h under MW at 120°C (Fig. S7).....                   | p.8  |
| H-D exchange reaction of phenylalanine for 20 min under MW at 120°C (Fig. S8).....      | p.9  |
| H-D exchange of phenylalanine with 10mg of catalyst and 50mg of aluminum (Fig. S9)..... | p.10 |

## **H-D exchange of amino acids (<sup>1</sup>HNMR, <sup>2</sup>HNMR and MS)**

|                                       |         |
|---------------------------------------|---------|
| Phenylalanine ( Fig. S10 and 11)..... | p.11-16 |
| Glycine (Fig. S12.).....              | p.17-19 |
| Histidine (Fig. S13).....             | p.20-22 |
| Alanine (Fig. S14 and 15).....        | p.23-28 |

## **H-D exchange of amines, esters and alcohols (<sup>1</sup>HNMR, <sup>2</sup>HNMR and MS)**

|                                            |         |
|--------------------------------------------|---------|
| Ethylaniline (Fig. S16).....               | p.29-32 |
| Ethylenedianiline (Fig. S17).....          | p.33-36 |
| Phenylethylamine (Fig. S18).....           | p.37-40 |
| Diethyl malonate (Fig. S19) .....          | p.41-43 |
| Diethylmethyl malonate (Fig. S20).....     | p.44-47 |
| 3,5dihydroxybenzyl alcohol (Fig. S21)..... | p.48-51 |

|                                                              |         |
|--------------------------------------------------------------|---------|
| <b>Recycling of catalytic system (Fig. S22 and 23)</b> ..... | p.52-54 |
|--------------------------------------------------------------|---------|

## D<sub>2</sub> gas production experiment

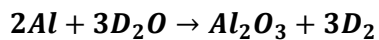

Amount of Al (mmol)

- 100mg:  $n(Al) = \frac{m(Al)}{M(Al)} = \frac{100mg}{\frac{27g}{mol}} = 3.7mmol$
- 50mg:  $n(Al) = \frac{m(Al)}{M(Al)} = \frac{50mg}{\frac{27g}{mol}} = 1.9mmol$
- 25mg:  $n(Al) = \frac{m(Al)}{M(Al)} = \frac{25mg}{\frac{27g}{mol}} = 0.92mmol$

According to the above equation, the maximum amount of gas that can be produced is:

- 100mg:  $n(D_2) = \frac{3}{2} \times 3.7mmol = 5.6mmol$
- 50mg:  $n(D_2) = \frac{3}{2} \times 1.9mmol = 2.9mmol$
- 25mg:  $n(D_2) = \frac{3}{2} \times 0.92mmol = 1.38mmol$

### ➤ Measurements of volume of gas produced under conventional heating

The volume of gas produced was measured over 6h at 80°C using various amount of Al in 1.5mL of D<sub>2</sub>O:

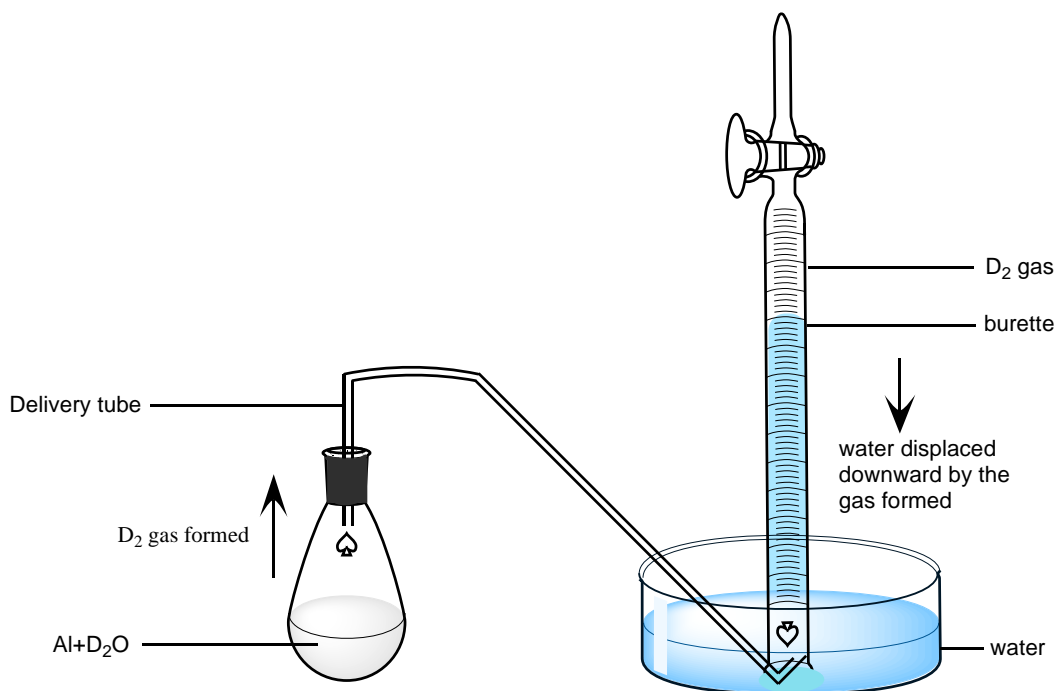

Figure S1. Measurement of the volume of D<sub>2</sub> gas formed at 80°C

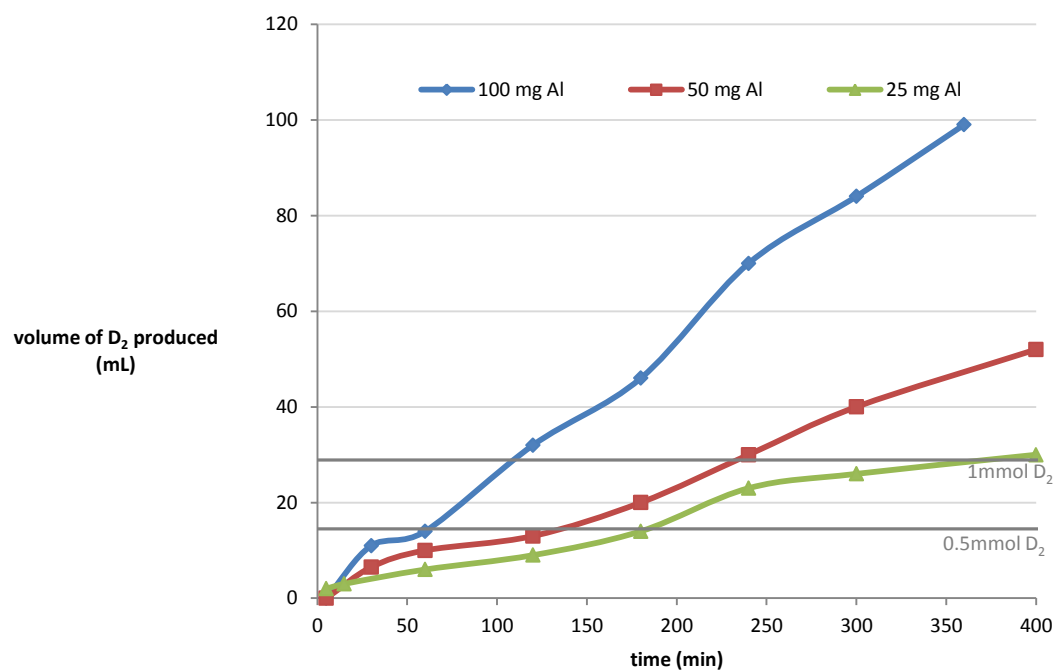

Figure 1 (from article): Volume of D<sub>2</sub> produced over time using various amount of Al at 80°C (oil bath).

Assuming that D<sub>2</sub> gas follows the ideal gas Law

After 6h using 25mg of Al, about 30mL of gas was produced.

$$PV = nRT$$

$$n(D_2) = \frac{P \times V}{R \times T} \text{ with } R = 0.08206 \text{ L atm mol}^{-1}K^{-1}$$

$$n(D_2) = \frac{1 \text{ atm} \times 0.030 \text{ L}}{0.08206 \text{ L atm mol}^{-1}K^{-1} \times 353K} = 1.0 \text{ mmol}$$

## Figure S2. Calibration of the quantitative determination of hydrogen content method in $^1\text{H}$ NMR

40  $\mu\text{L}$  of acetic acid (the external standard) was added to 10 mL of  $\text{D}_2\text{O}$ . 1 mL of this stock solution was added to 1 mL of phenylalanine solution in a vial and stirred up for 2 min. 0.7 mL of this mixture was taken for NMR analysis. For each substrate, a reference spectrum was generated and used as a comparison to any spectrum obtained after H-D exchange reaction. The deuterium content was calculated based on the ratio of the integration of hydrogen before H-D exchange to the integration of hydrogen after H-D exchange, both standardized with the acetic acid signal. Note that a new reference spectrum had to be taken when using a different standard stock solution to reduce additional errors.

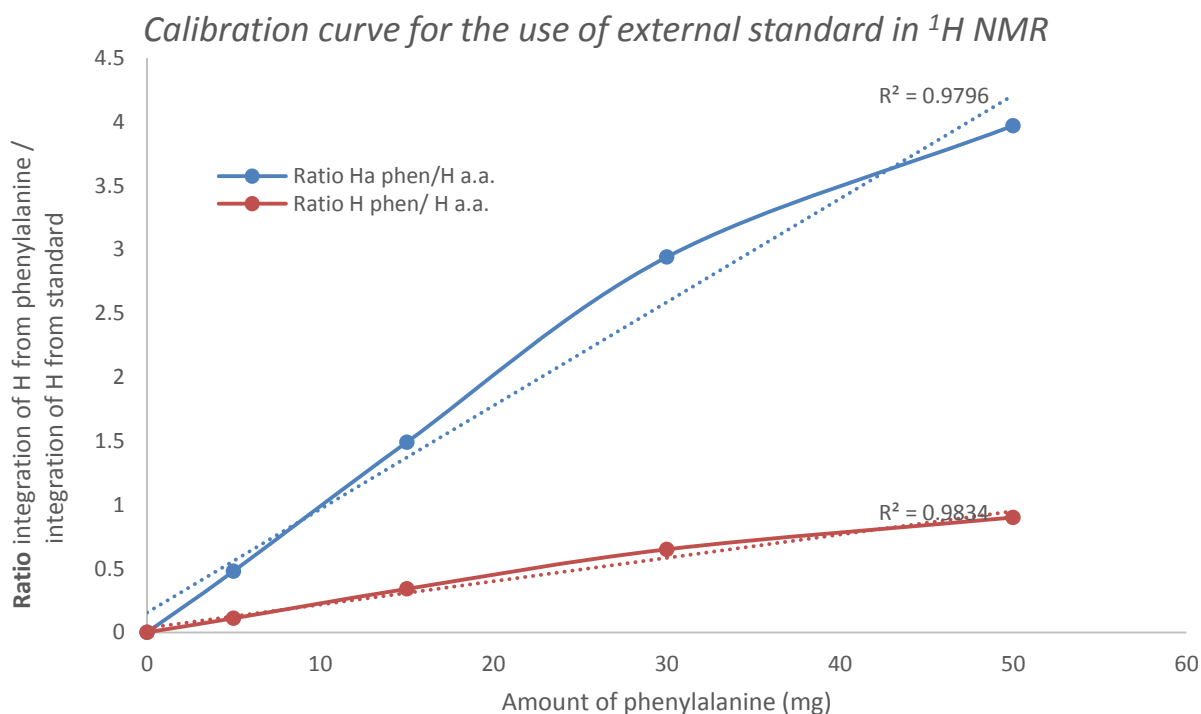

| Amount of phenylalanine (mg) | Ratio $H_a$ /H a.a. | Ratio H/H a.a. |
|------------------------------|---------------------|----------------|
| 0                            | 0                   | 0              |
| 5                            | 0.48                | 0.11           |
| 15                           | 1.49                | 0.34           |
| 30                           | 2.94                | 0.65           |
| 50                           | 3.97                | 0.9            |

$H=H_B, H_C, H_D$ ; a.a.=acetic acid (standard)

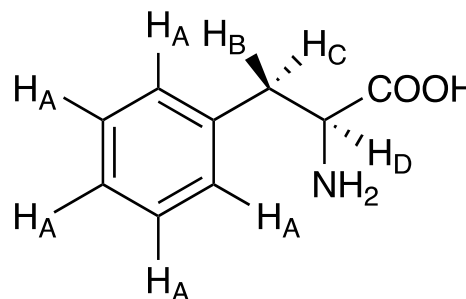

**Figure S3.**  $^1\text{H}$  NMR spectra for the calibration of the quantitative determination of hydrogen content method using acetic acid as the external standard and phenylalanine

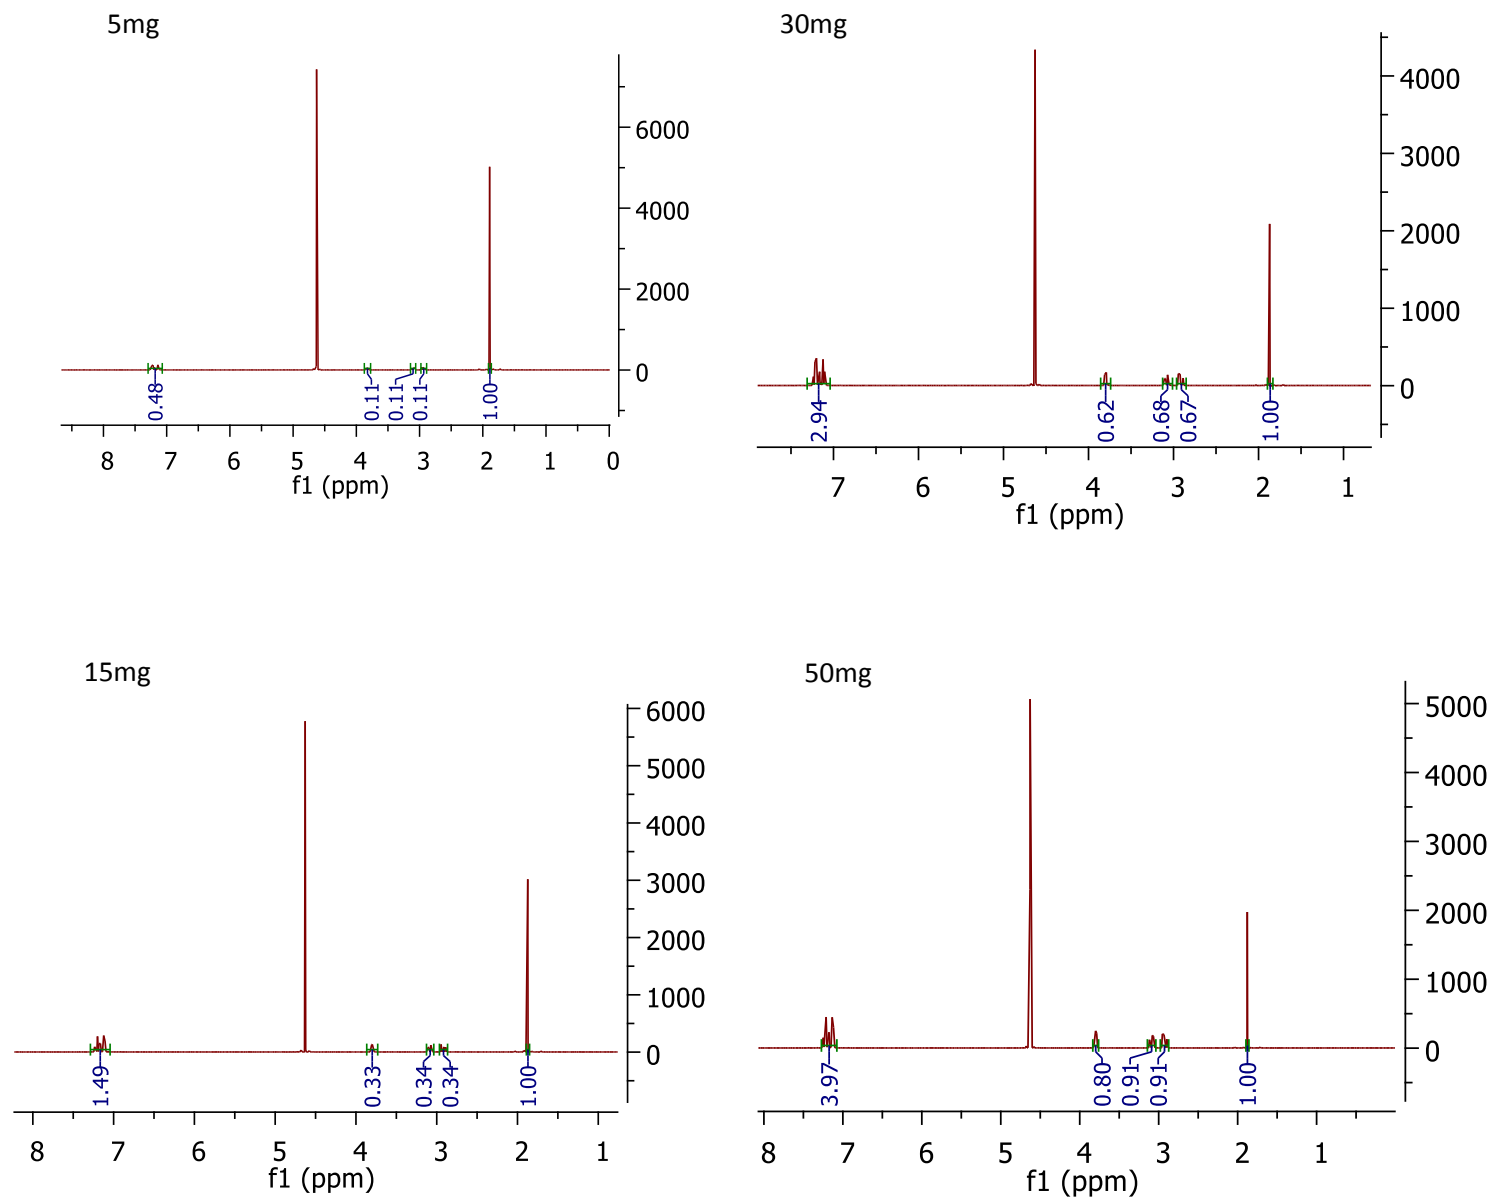

**Figure S4. H-D exchange reaction of phenylalanine for 24h at 80°C under conventional heating**

(20mg of Pd/C, 100mg of Al)

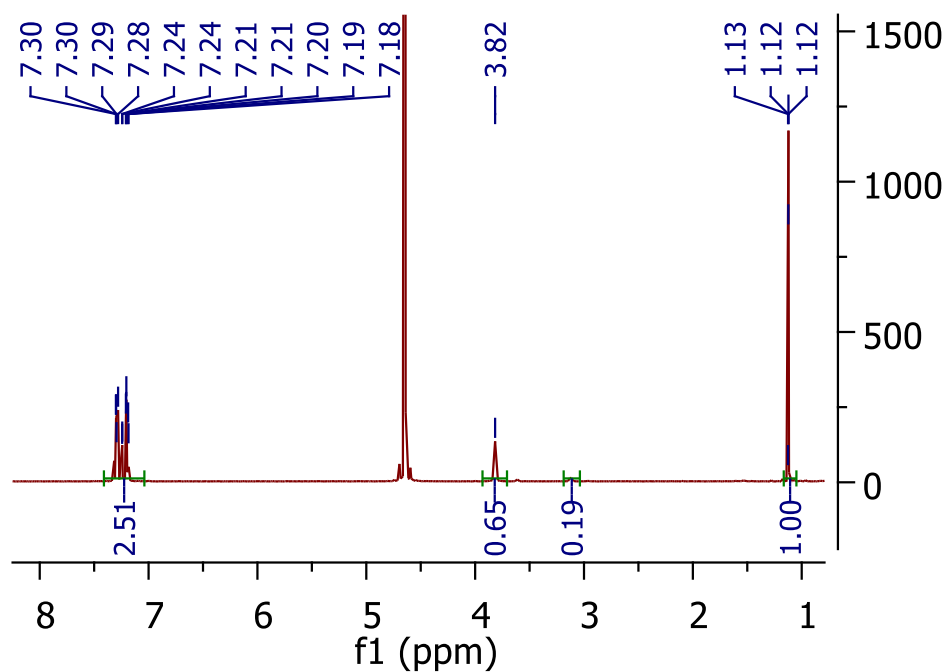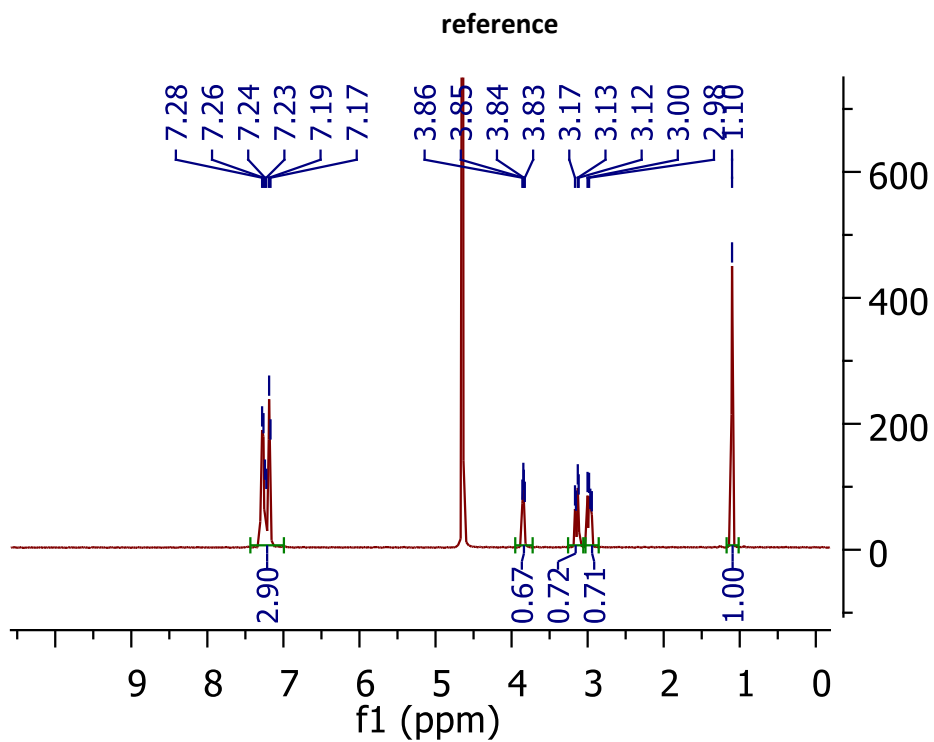

**Figure S5. H-D exchange reaction of phenylalanine for 1h under MW at 80°C**

(20mg of Pd/C, 100mg of Al)

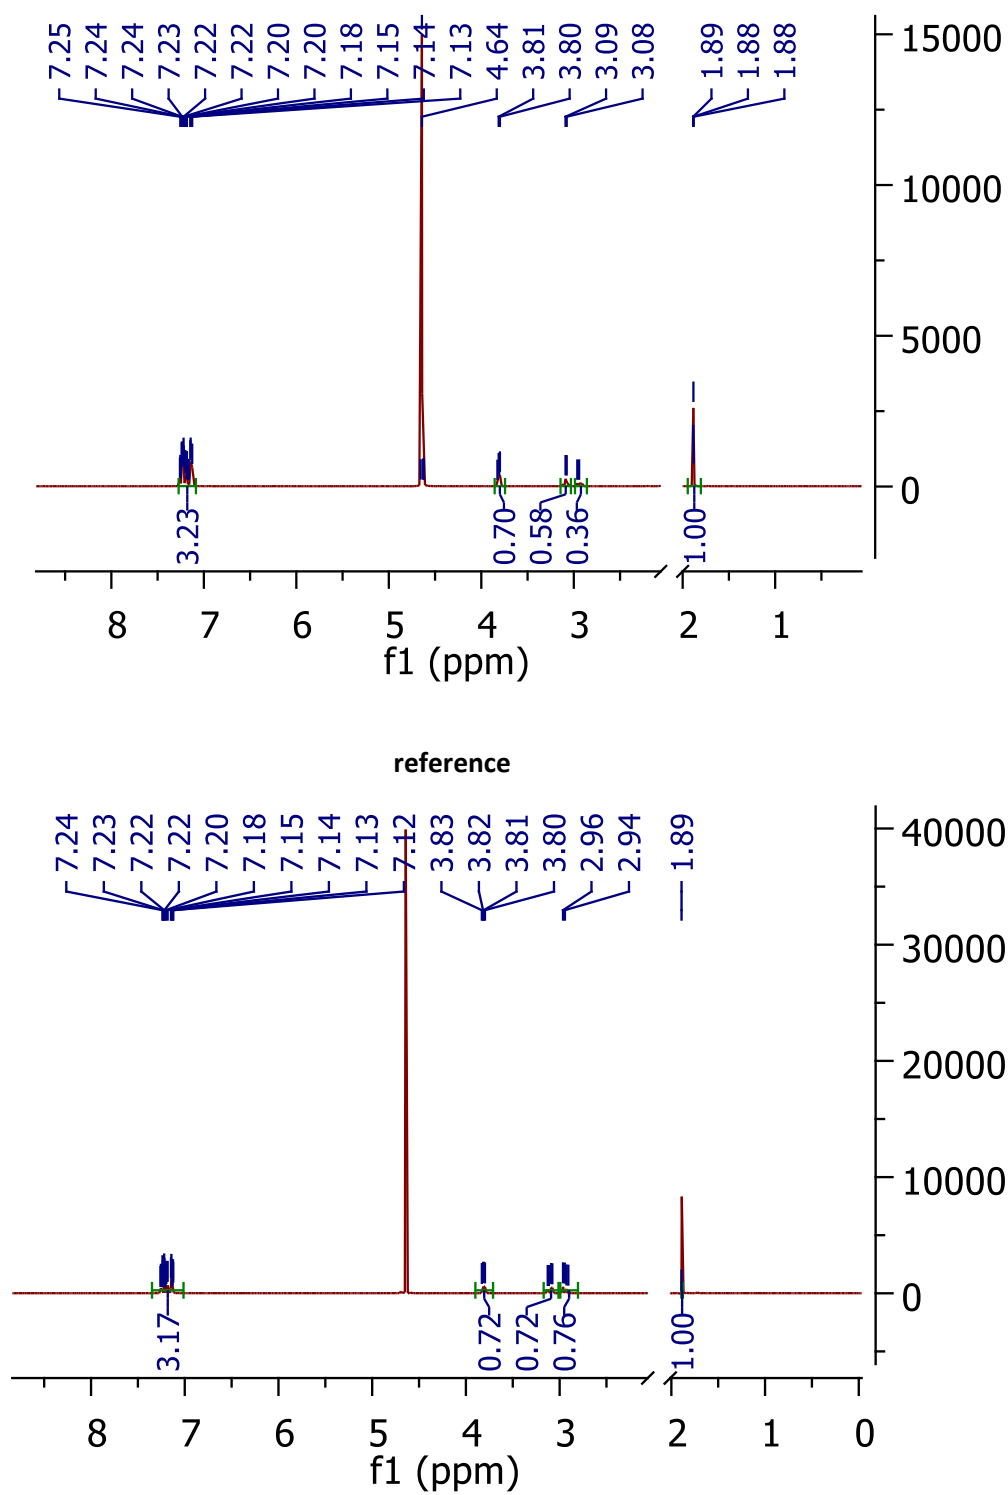



**Figure S6. H-D exchange reaction of phenylalanine for 1h under MW at 100°C**

(20mg of Pd/C, 100mg of Al)

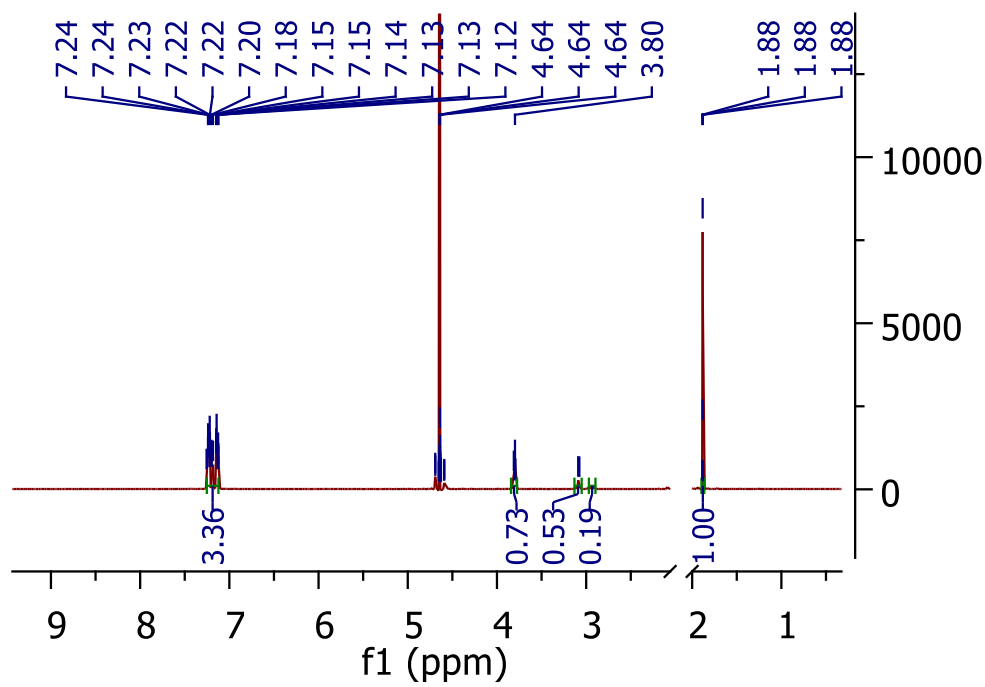

reference

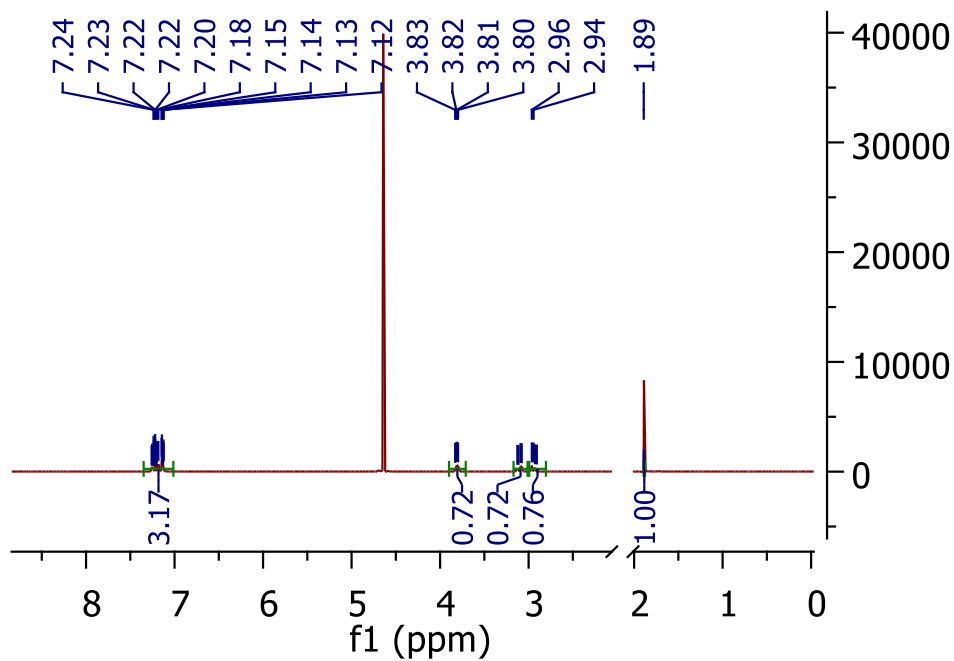

**Figure S7. H-D exchange reaction of phenylalanine for 1h under MW at 120°C**

(20mg of Pd/C, 100mg of Al)

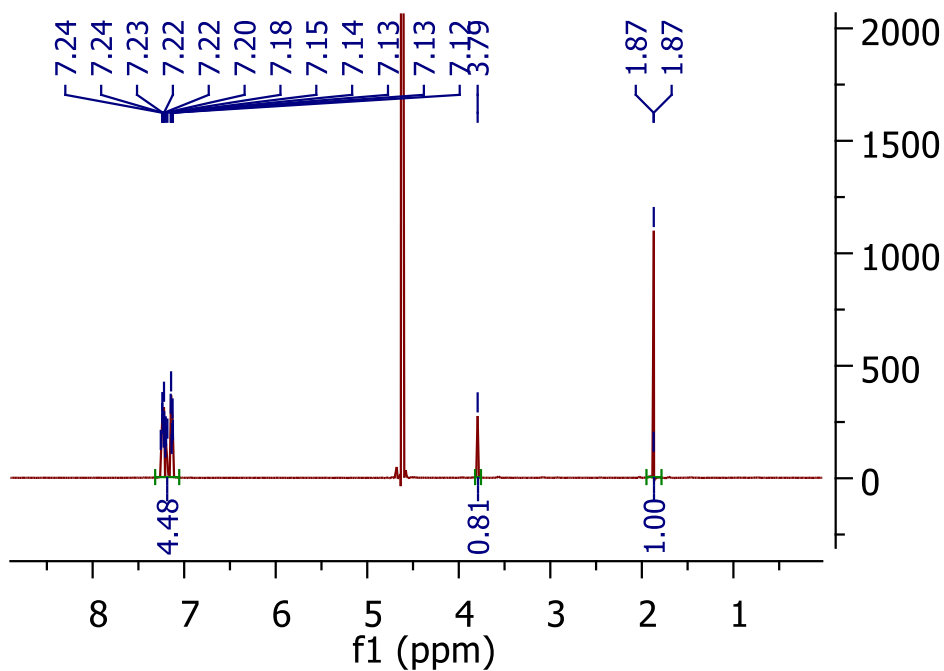

reference

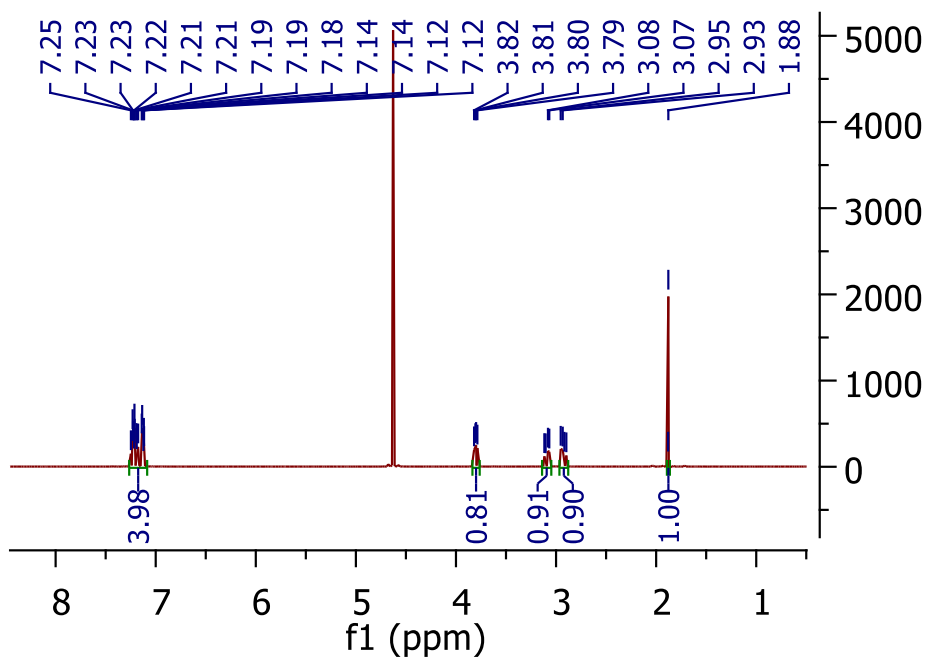

**Figure S8. H-D exchange reaction of phenylalanine for 20 min under MW at 120°C**

(20mg of Pd/C, 100mg of Al)

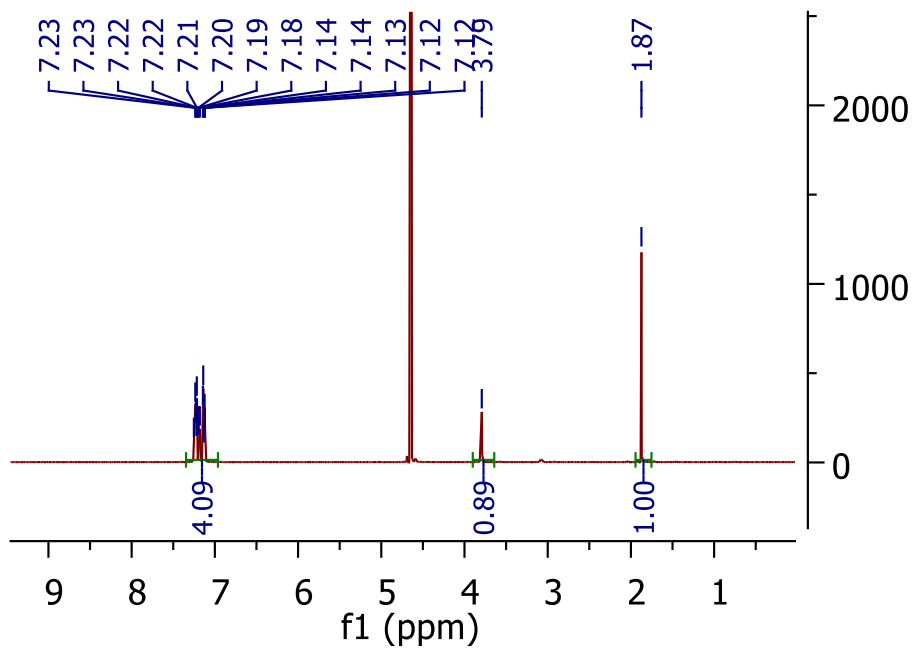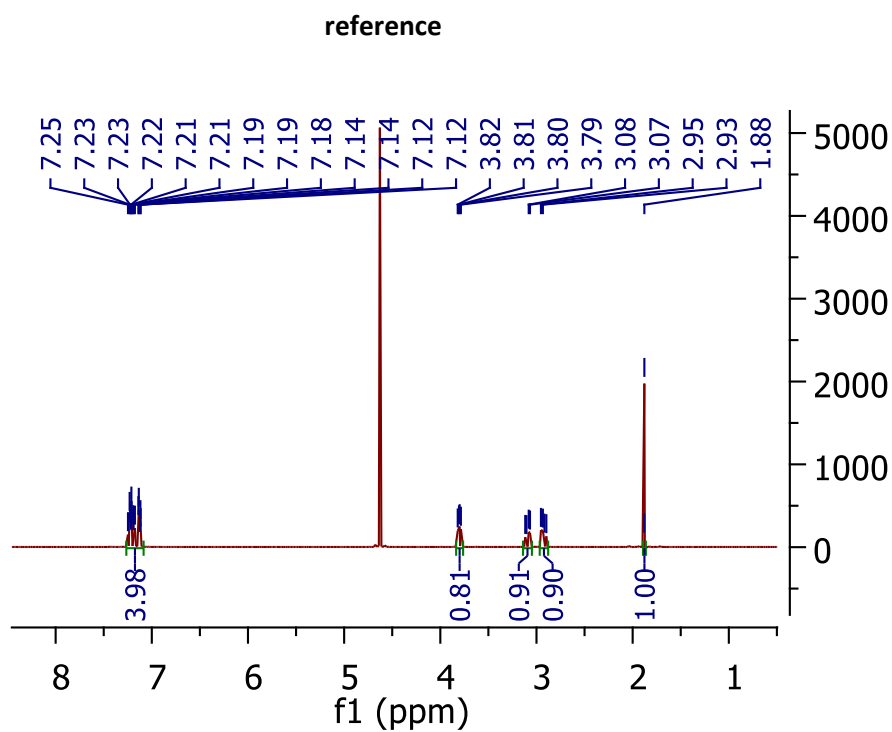

Figure S9. H-D exchange reaction of phenylalanine with 10mg of catalyst and 100mg of Al

(1h, MW, 120 °C)

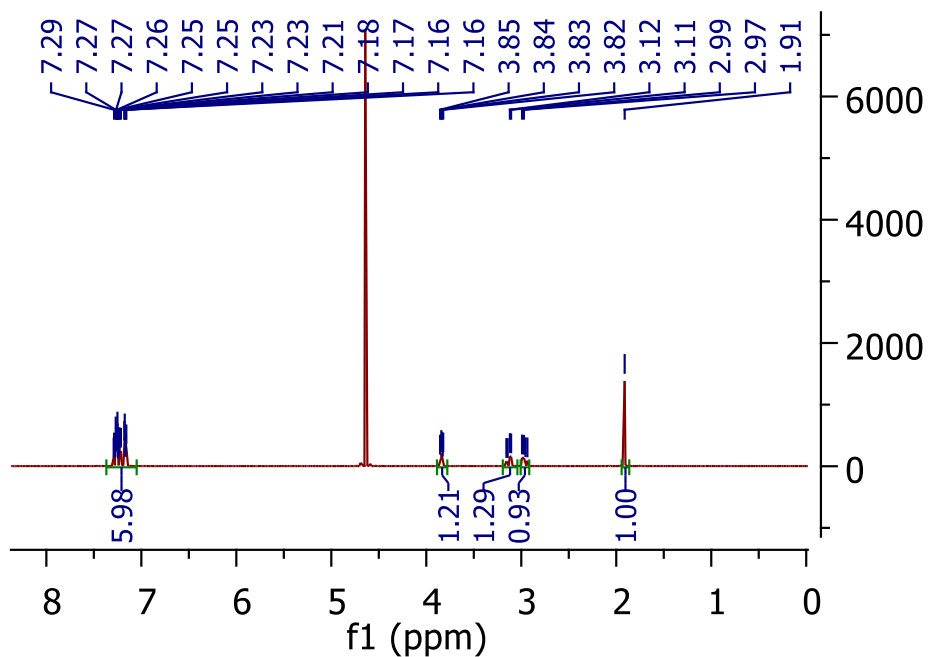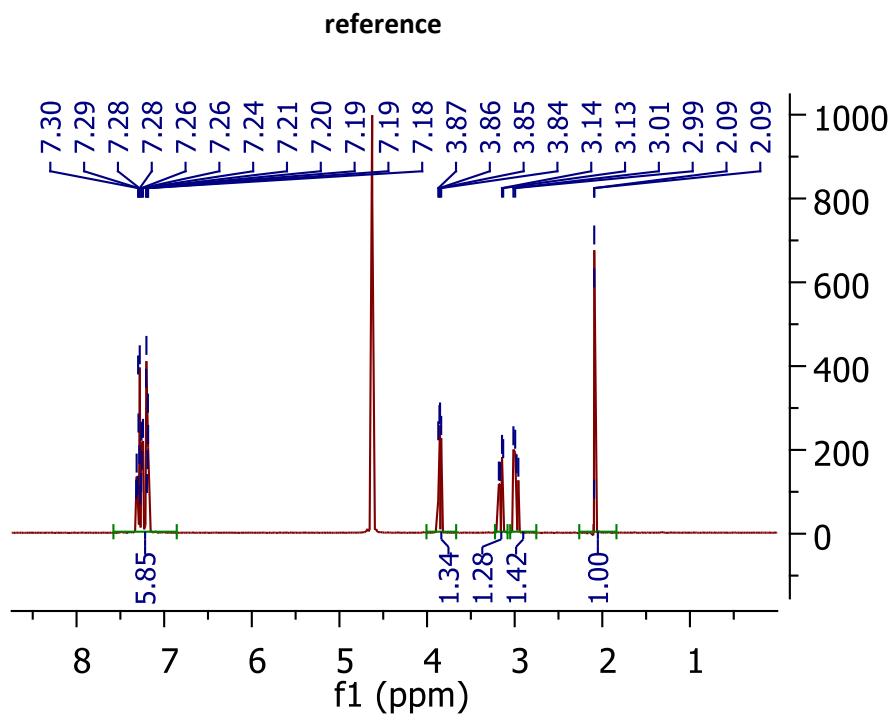

Figure S10. H-D exchange reaction of phenylalanine

(20mg of Pd/C, MW, 120 °C)

a.  $^1\text{H}$  NMR

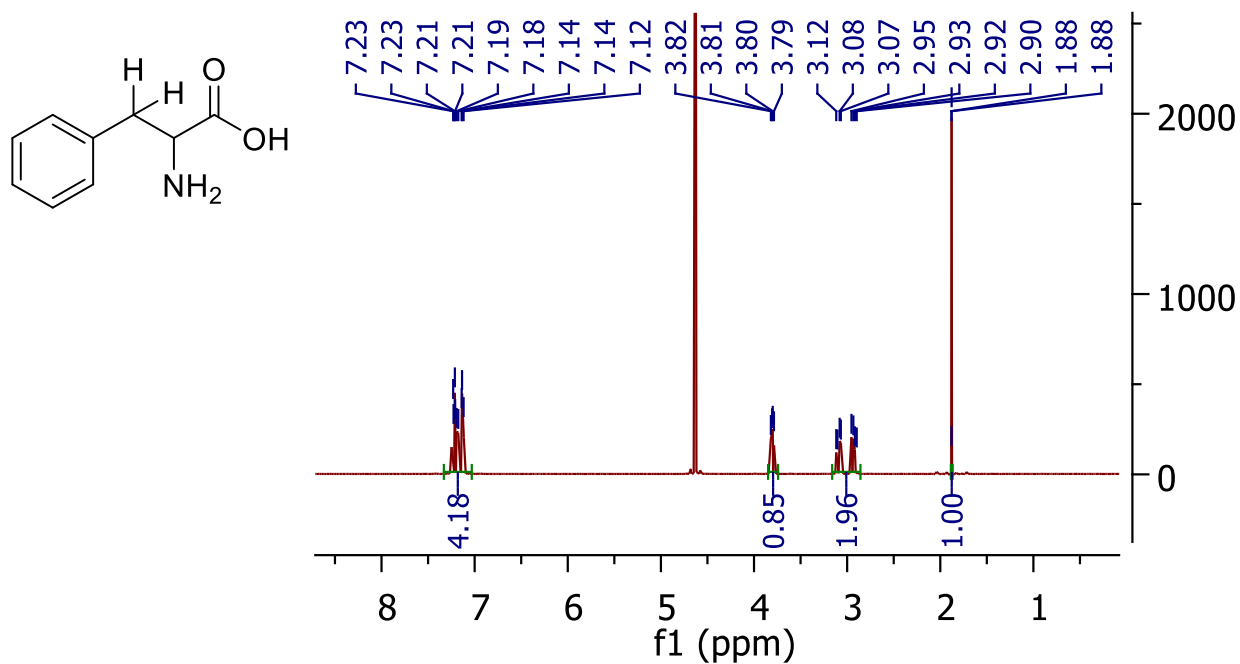

100mg of Al, 20min reaction

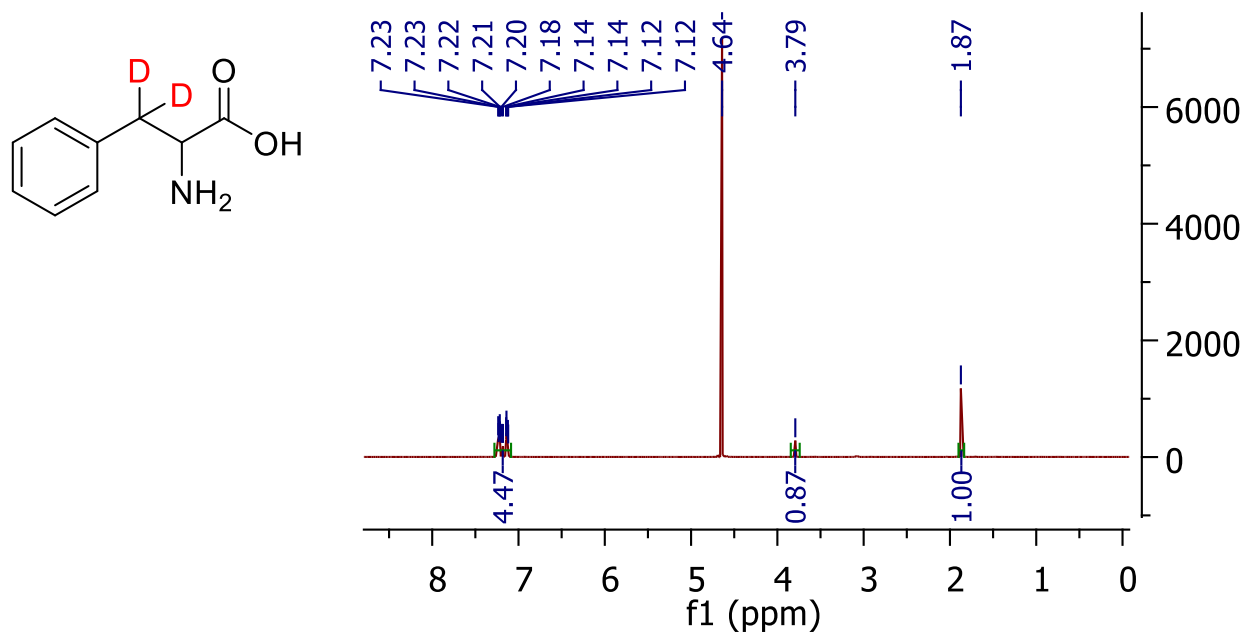

25mg Al, 60min reaction

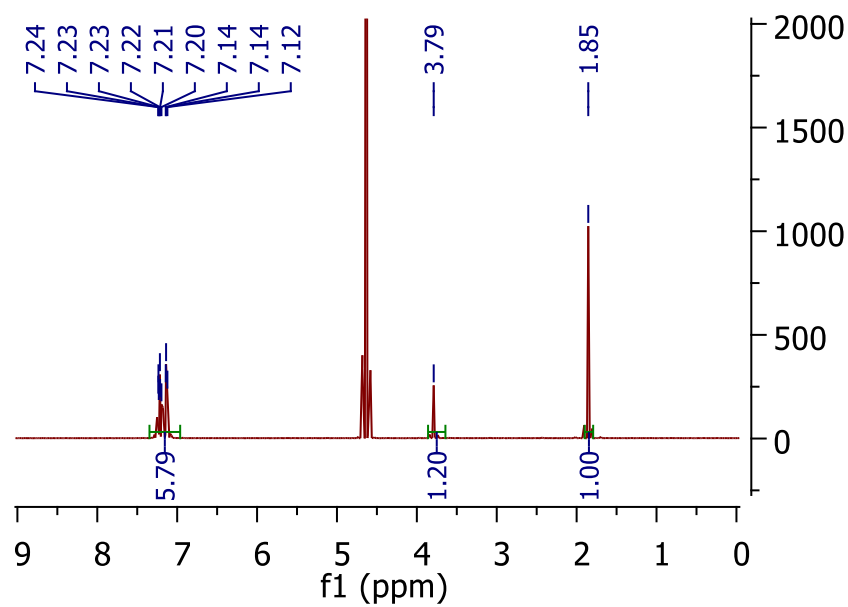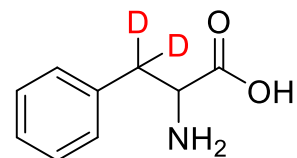

b. <sup>2</sup>H NMR

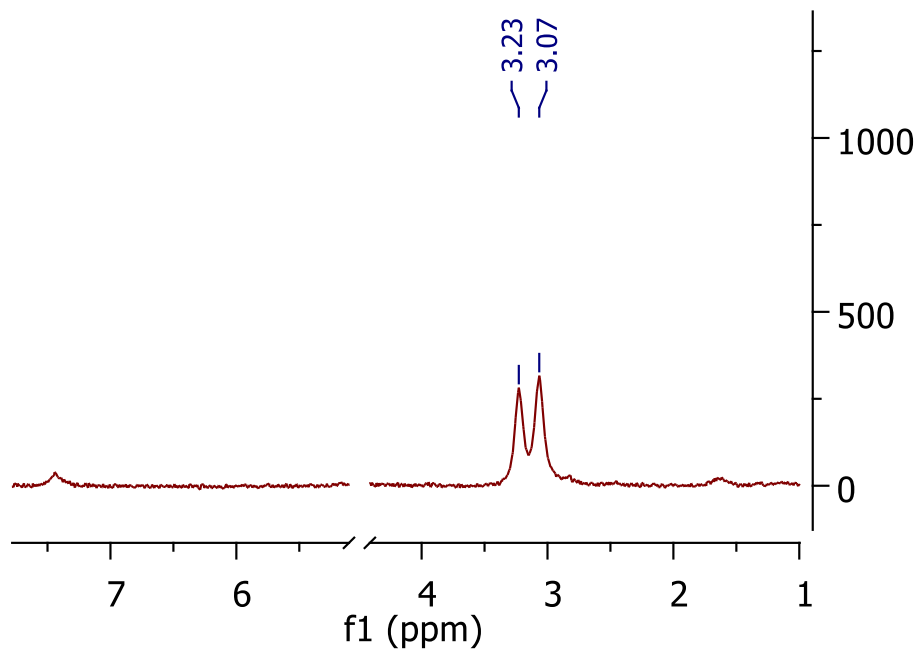

### c. Mass Spectrum

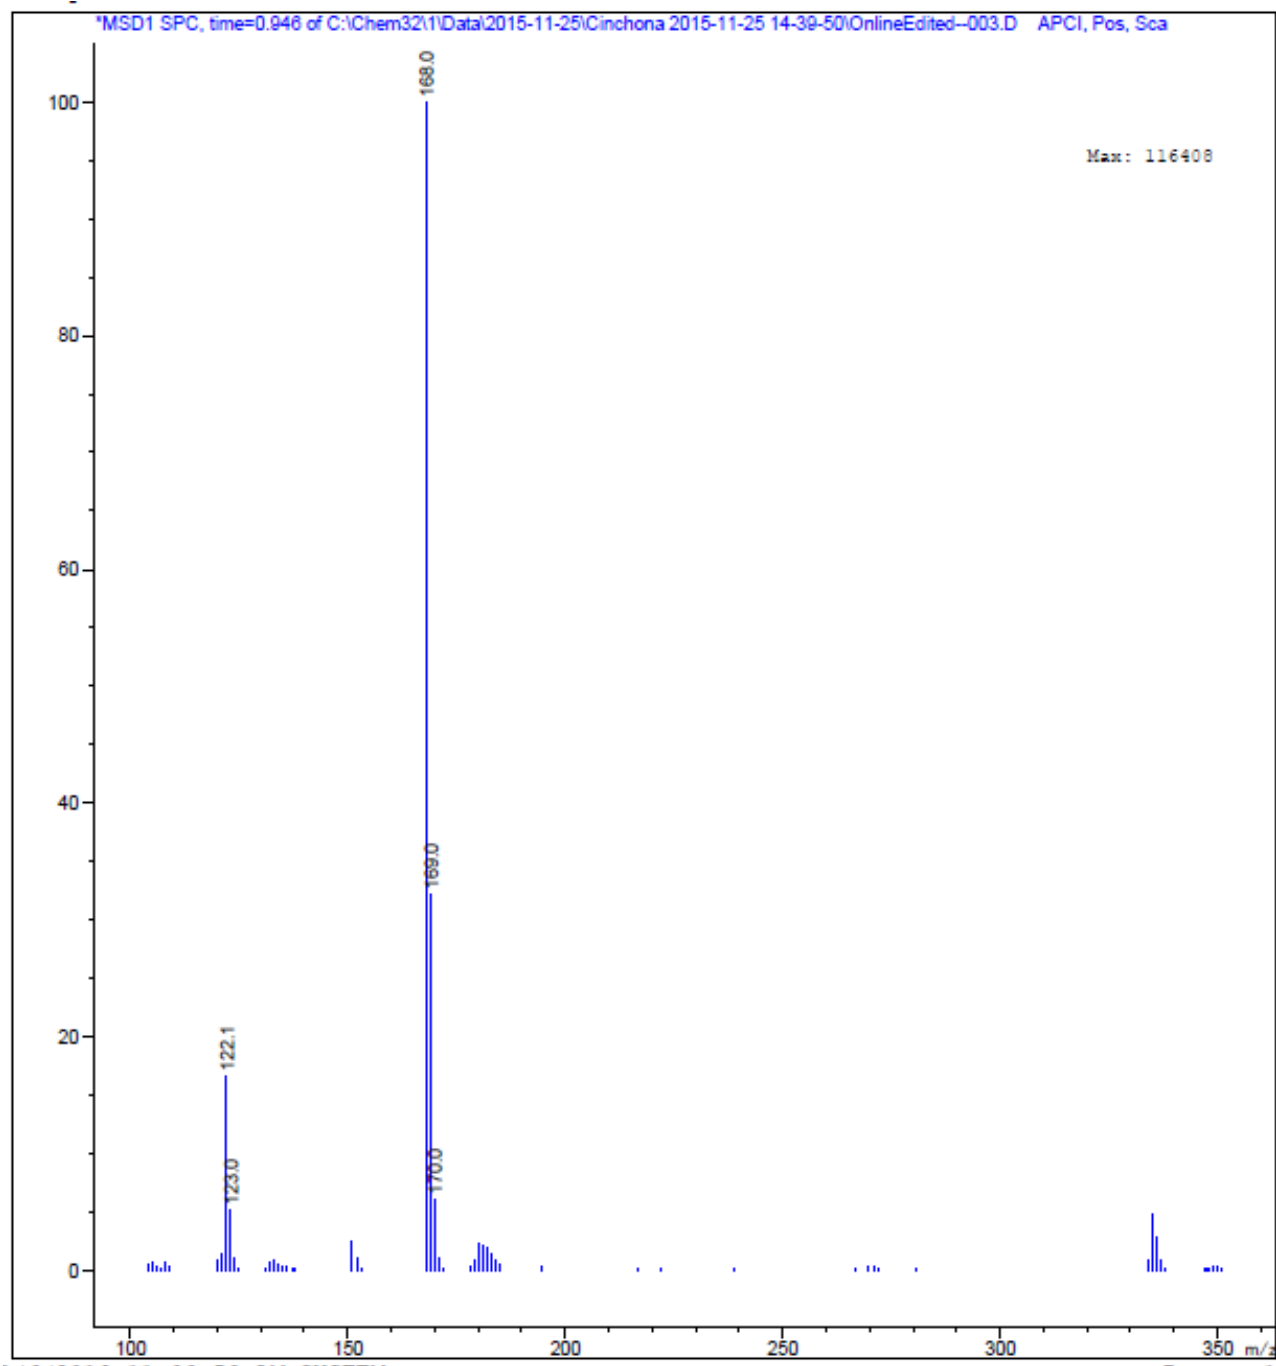

**Figure S11. Determination of the chirality of deuterated phenylalanine**

Phenylalanine was derivatized using isopropyl alcohol to form an amino acid ester first and then it was reacted with Mosher's chloride to functionalize the amino group; before it was injected in the GC-MS. The first chromatogram shows the separation of a pseudo racemic mixture of phenylalanine. The mass spectrum of both products was identical. The second chromatogram corresponds to the derivatized d<sub>2</sub>-phenylalanine.

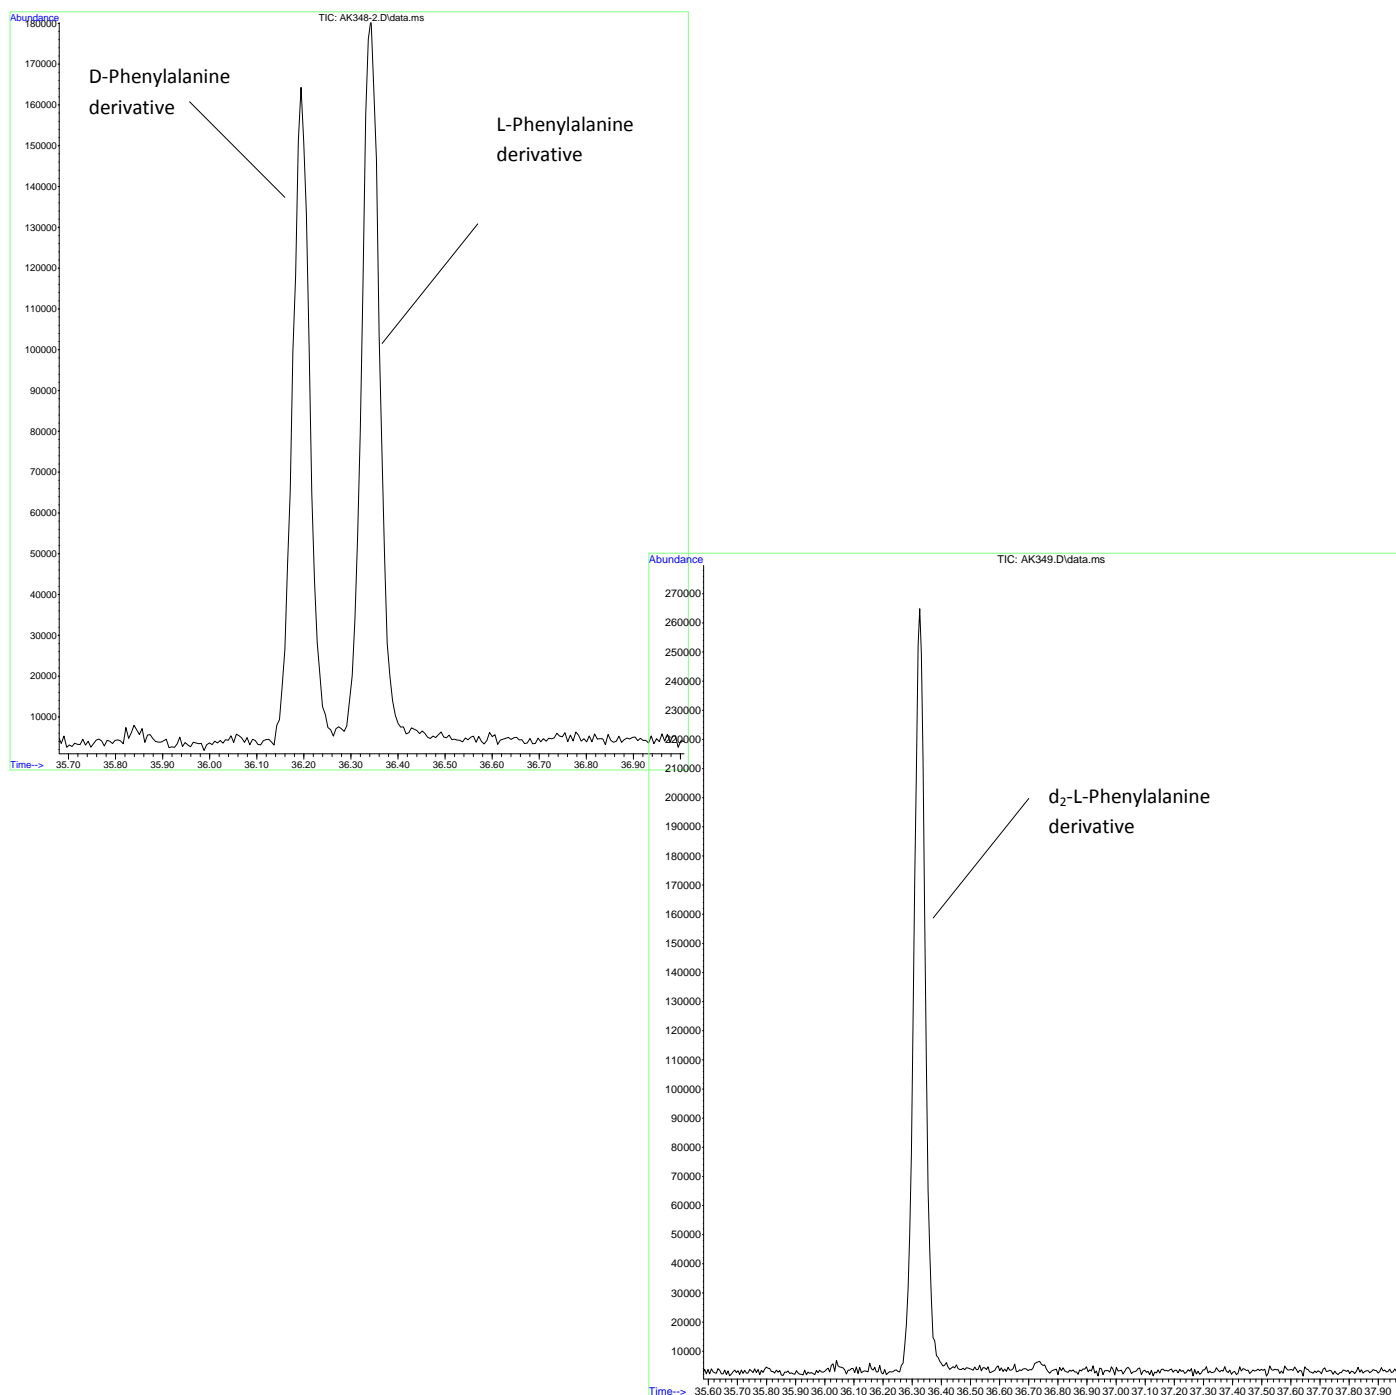



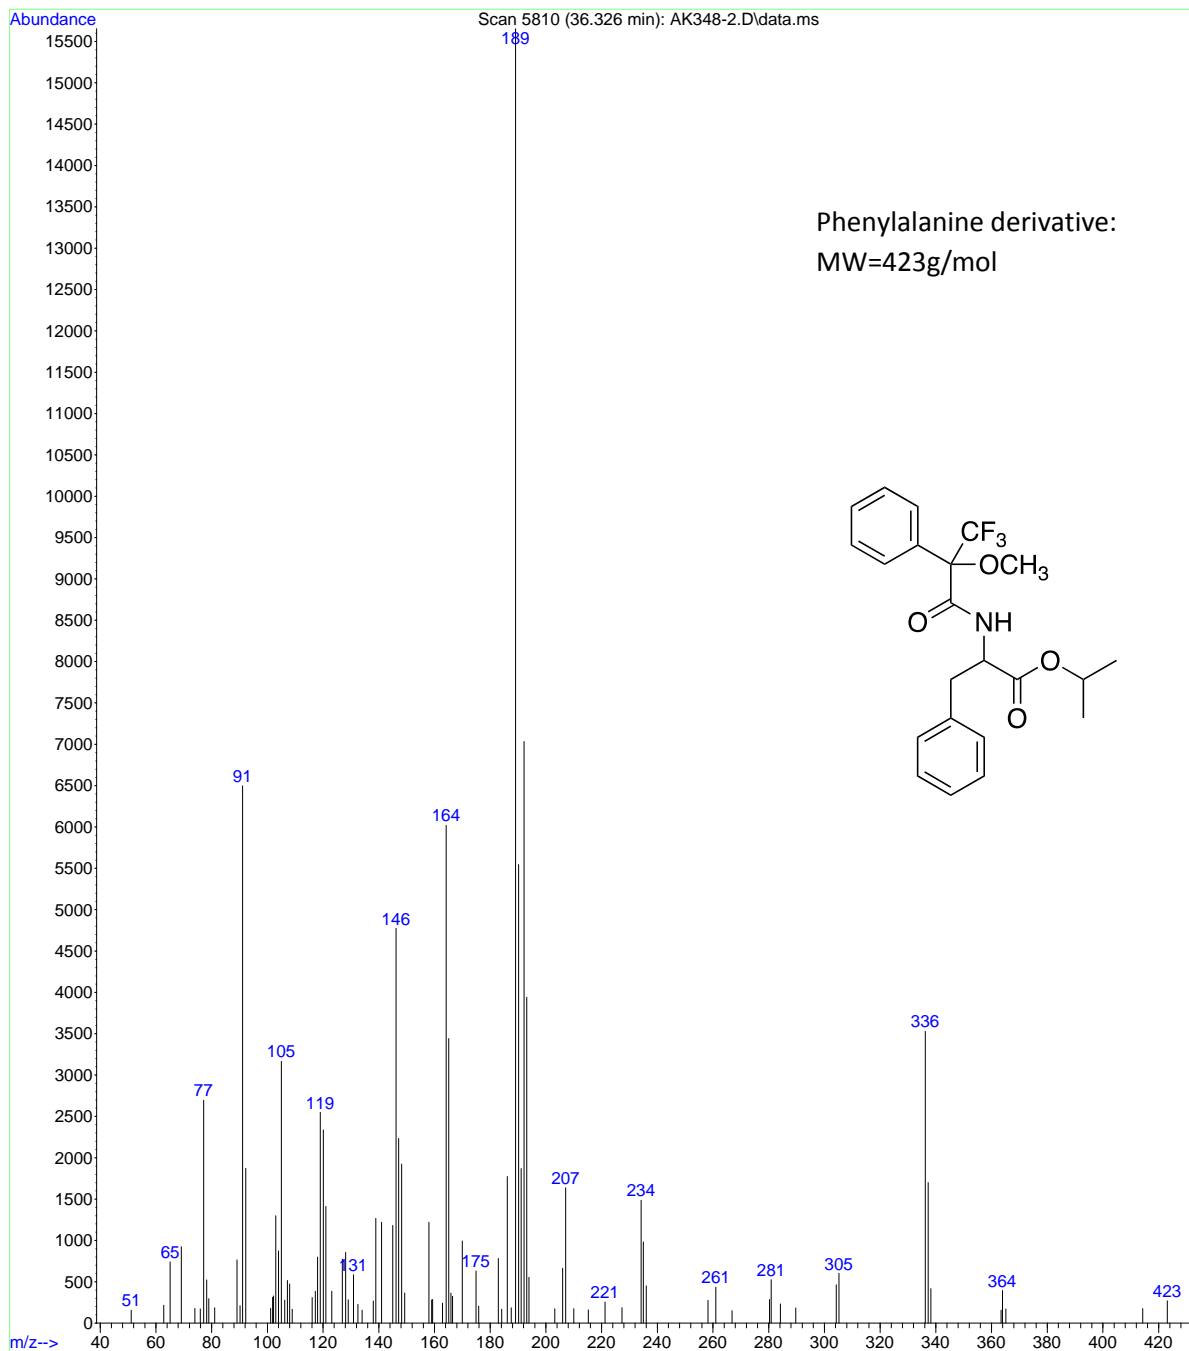

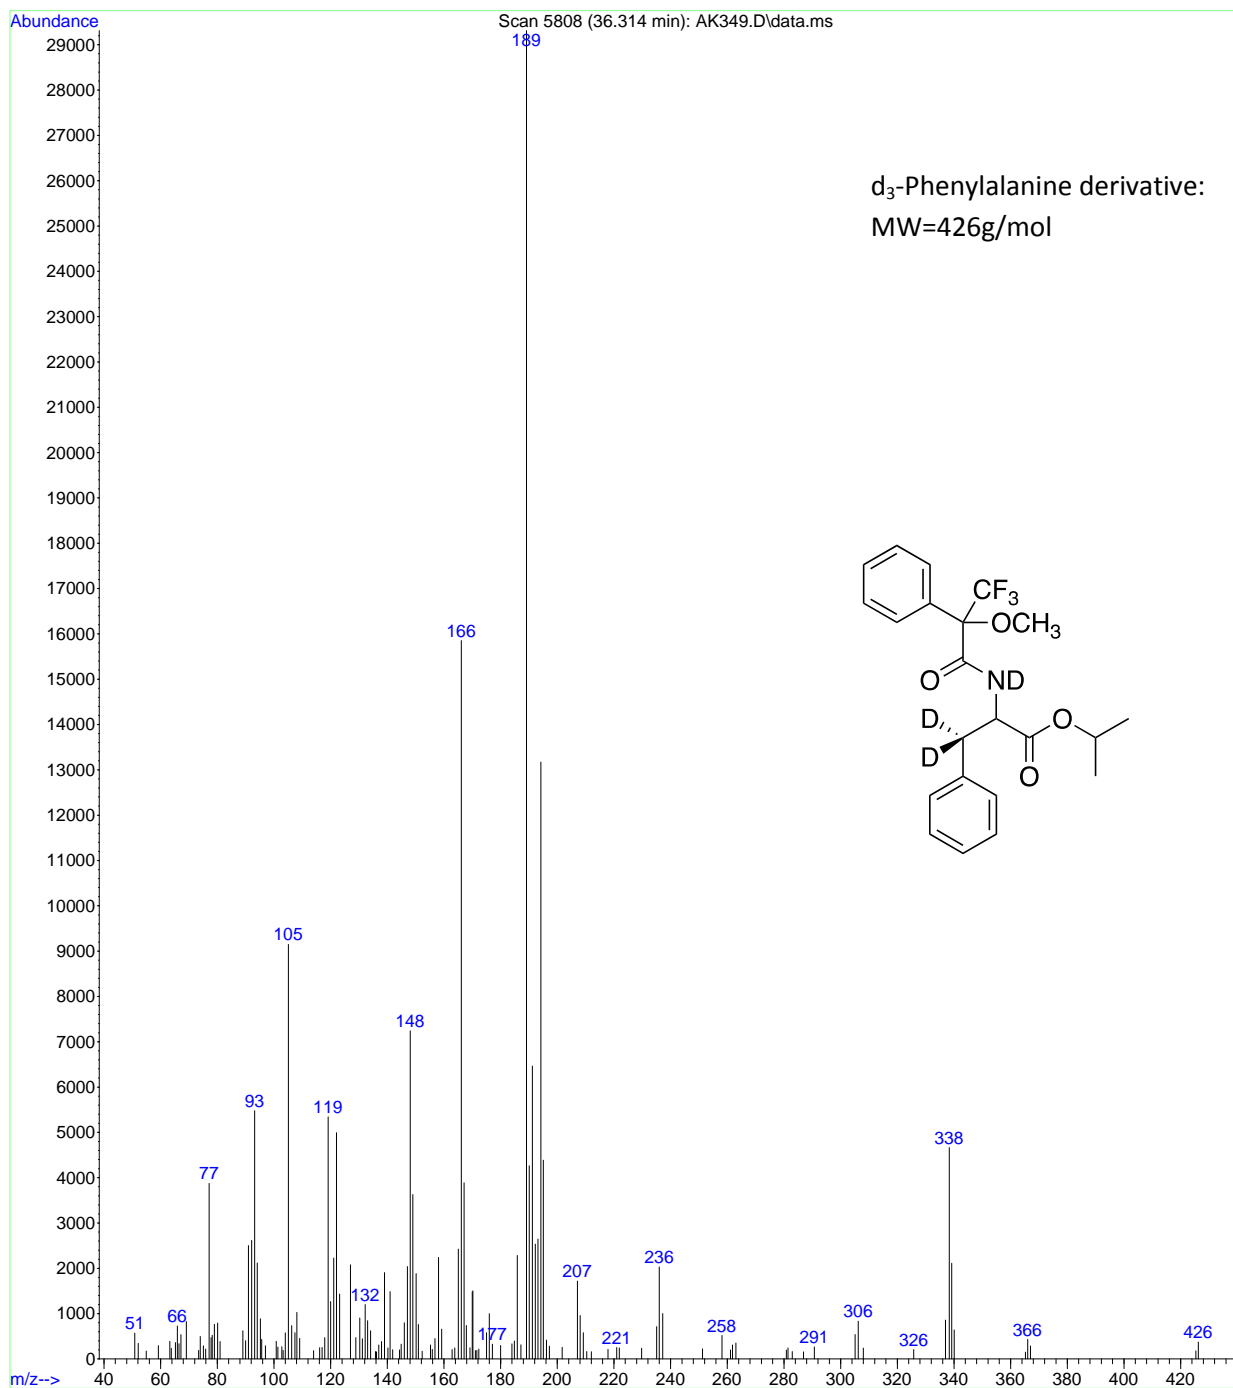

**Figure S12. H-D exchange reaction of glycine**

(20mg of Pd/C, MW, 170 °C, 60min))

**a.  $^1\text{H}$  NMR**

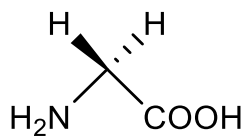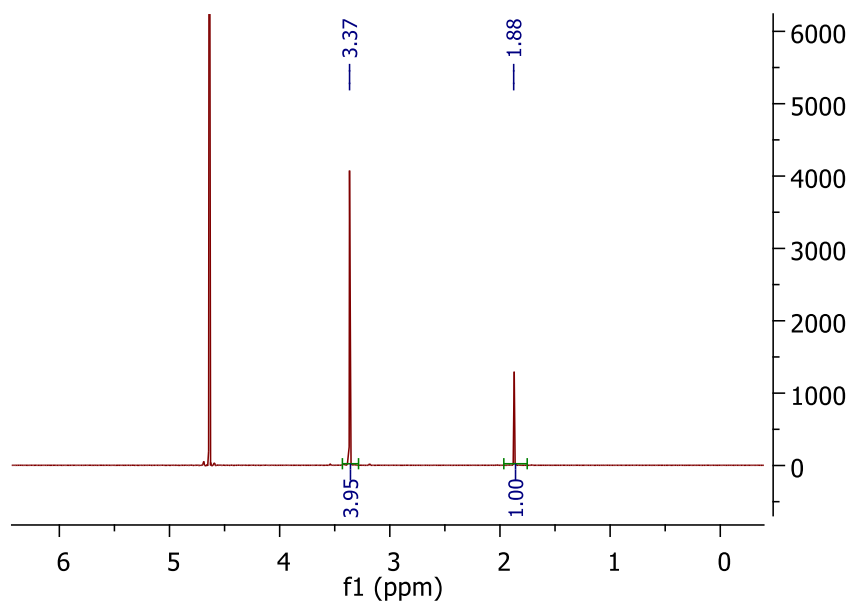

100mg Al

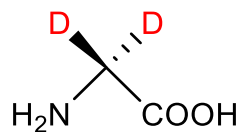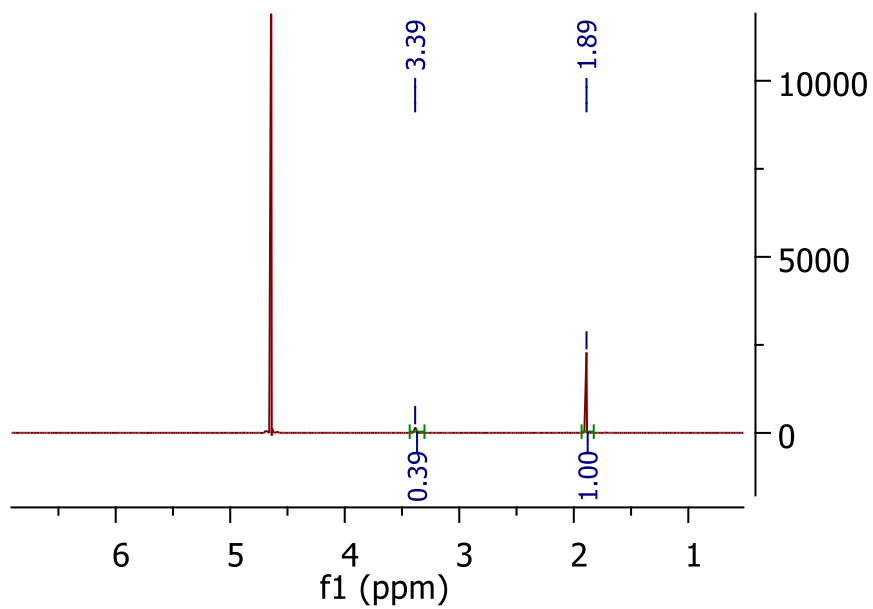

25mg Al

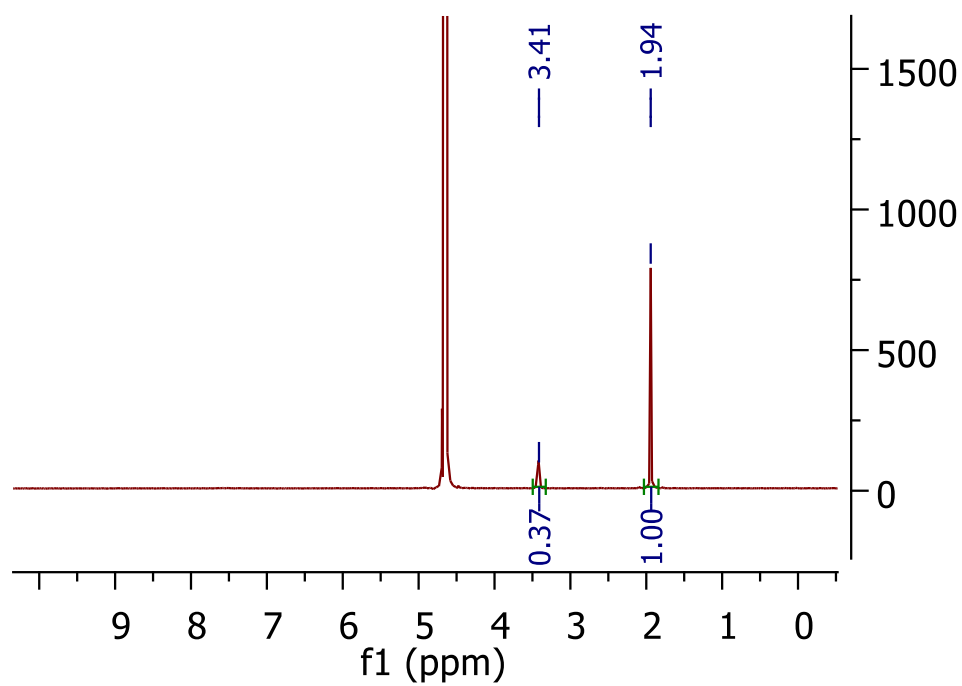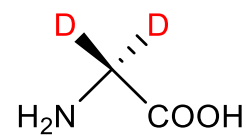

b.  $^2\text{H}$  NMR

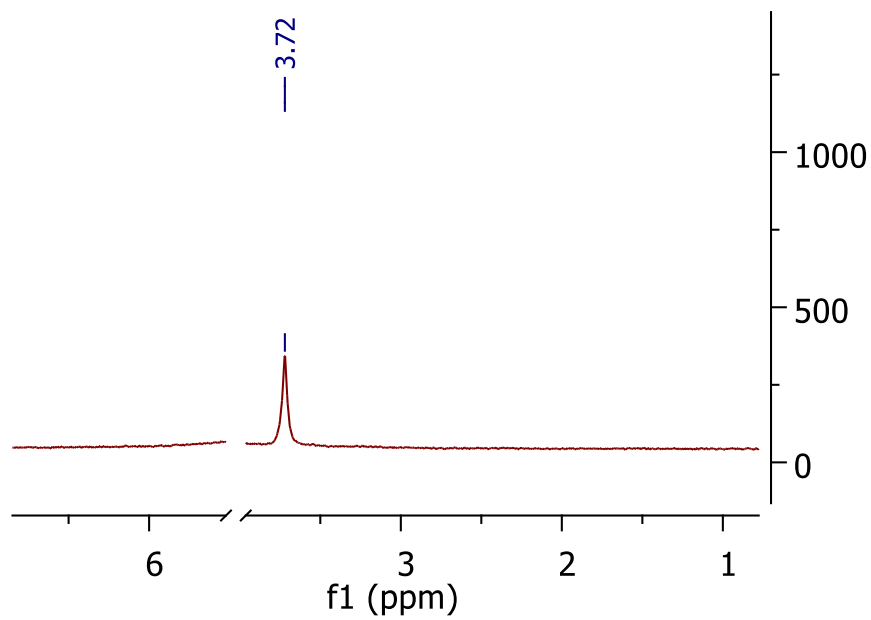

c. Mass Spectrum

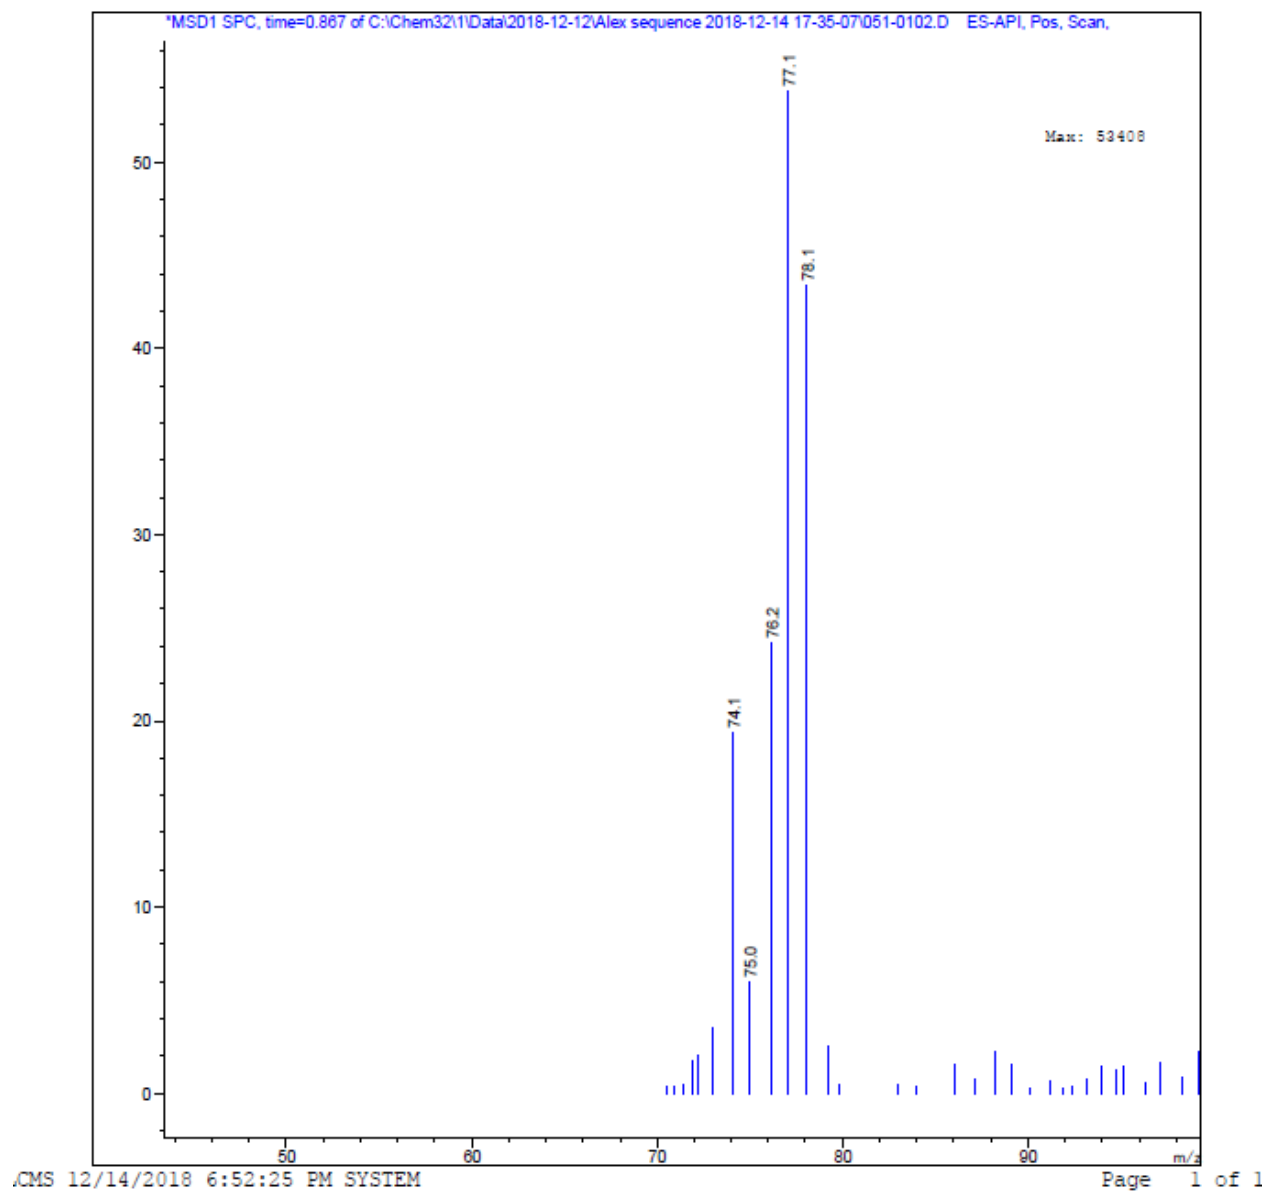

Figure S13. H-D exchange reaction of histidine

(20mg of Pd/C, MW, 120 °C, 60min)

a.  $^1\text{H}$  NMR

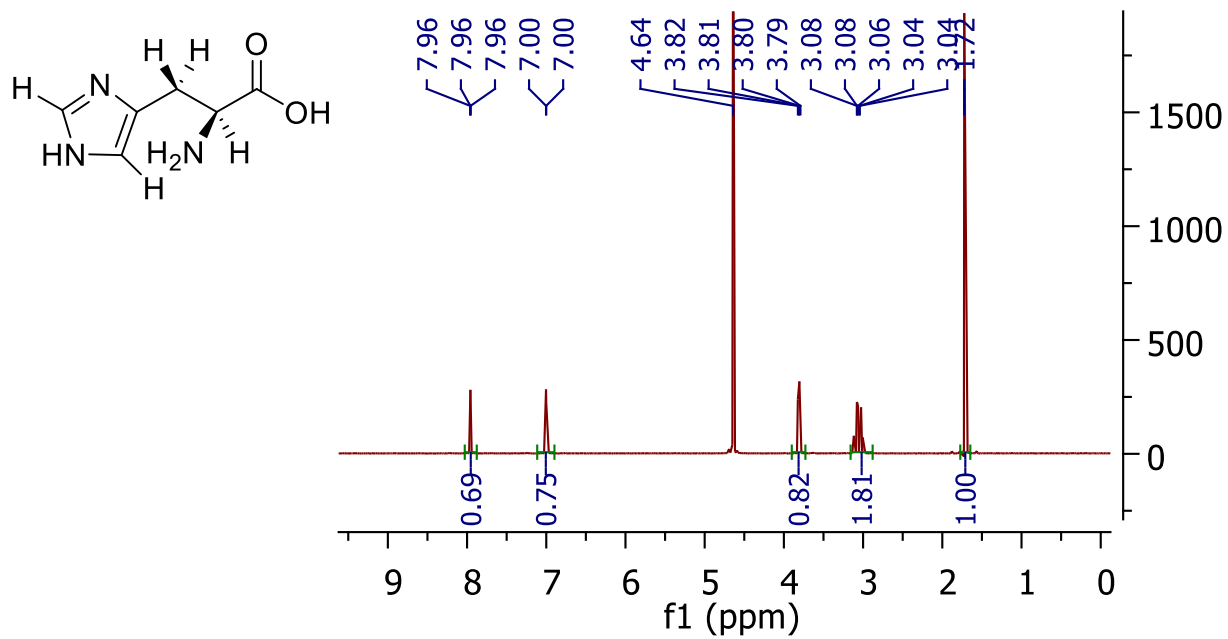

100mg Al

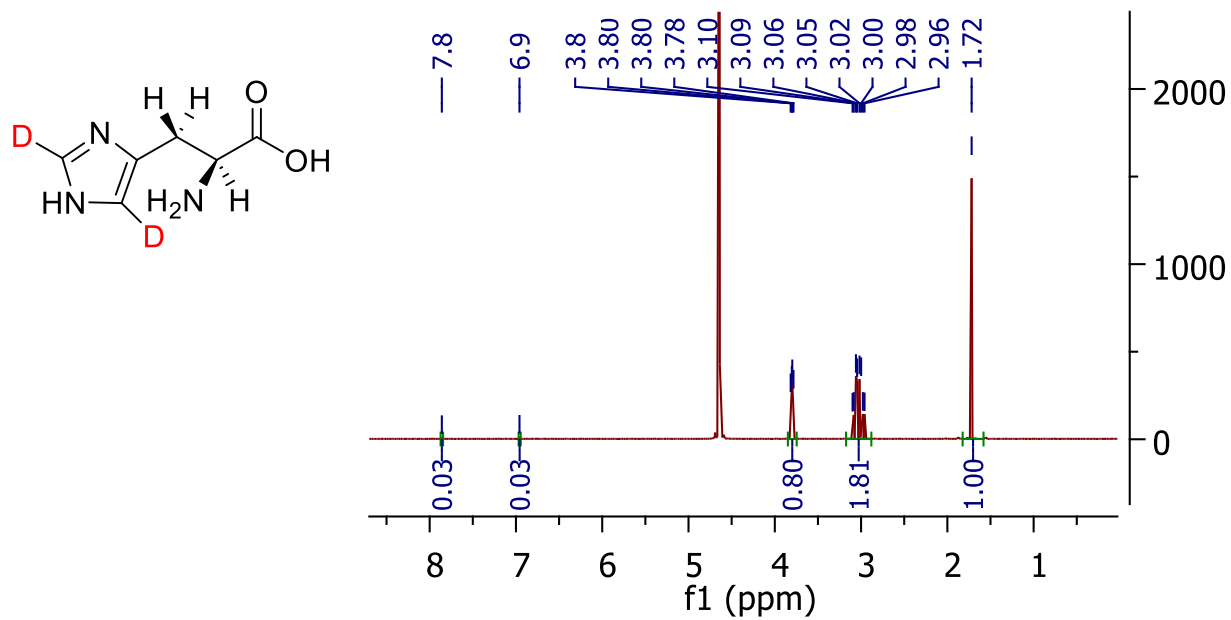

25mg Al

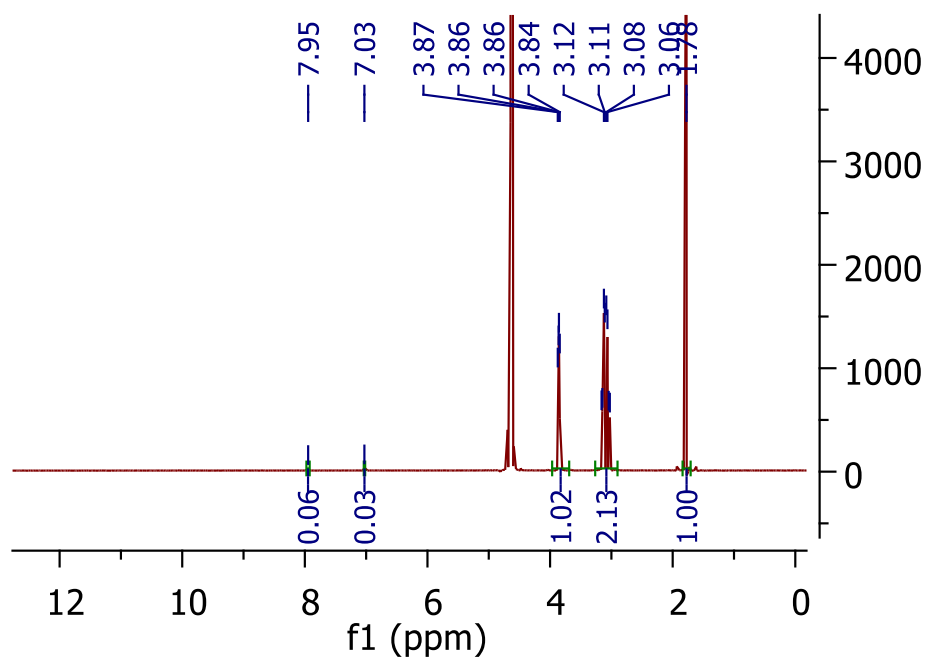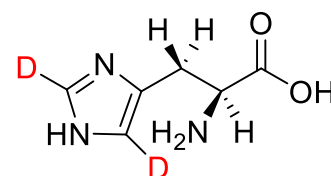

b. <sup>2</sup>H NMR

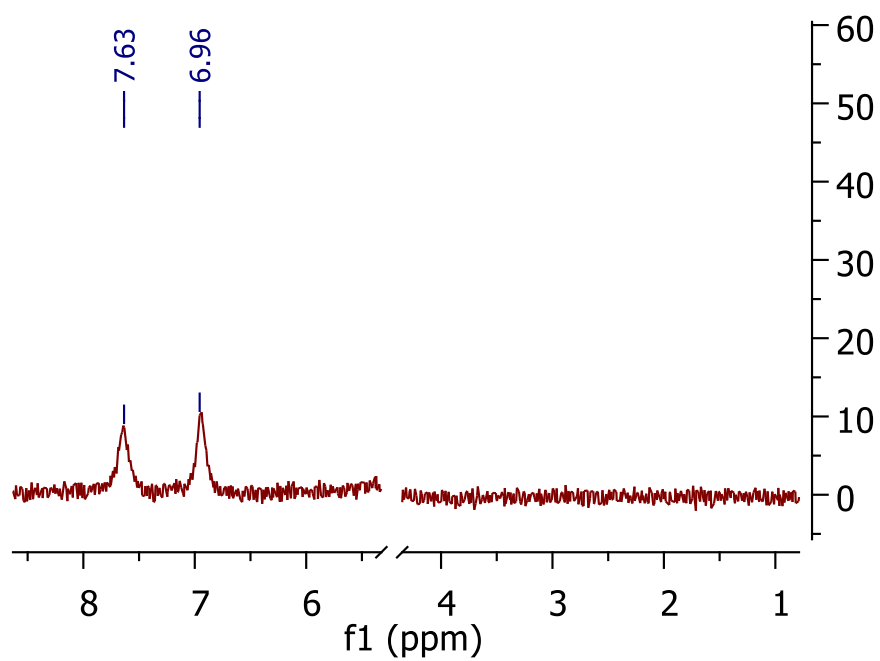

c. Mass spectrum

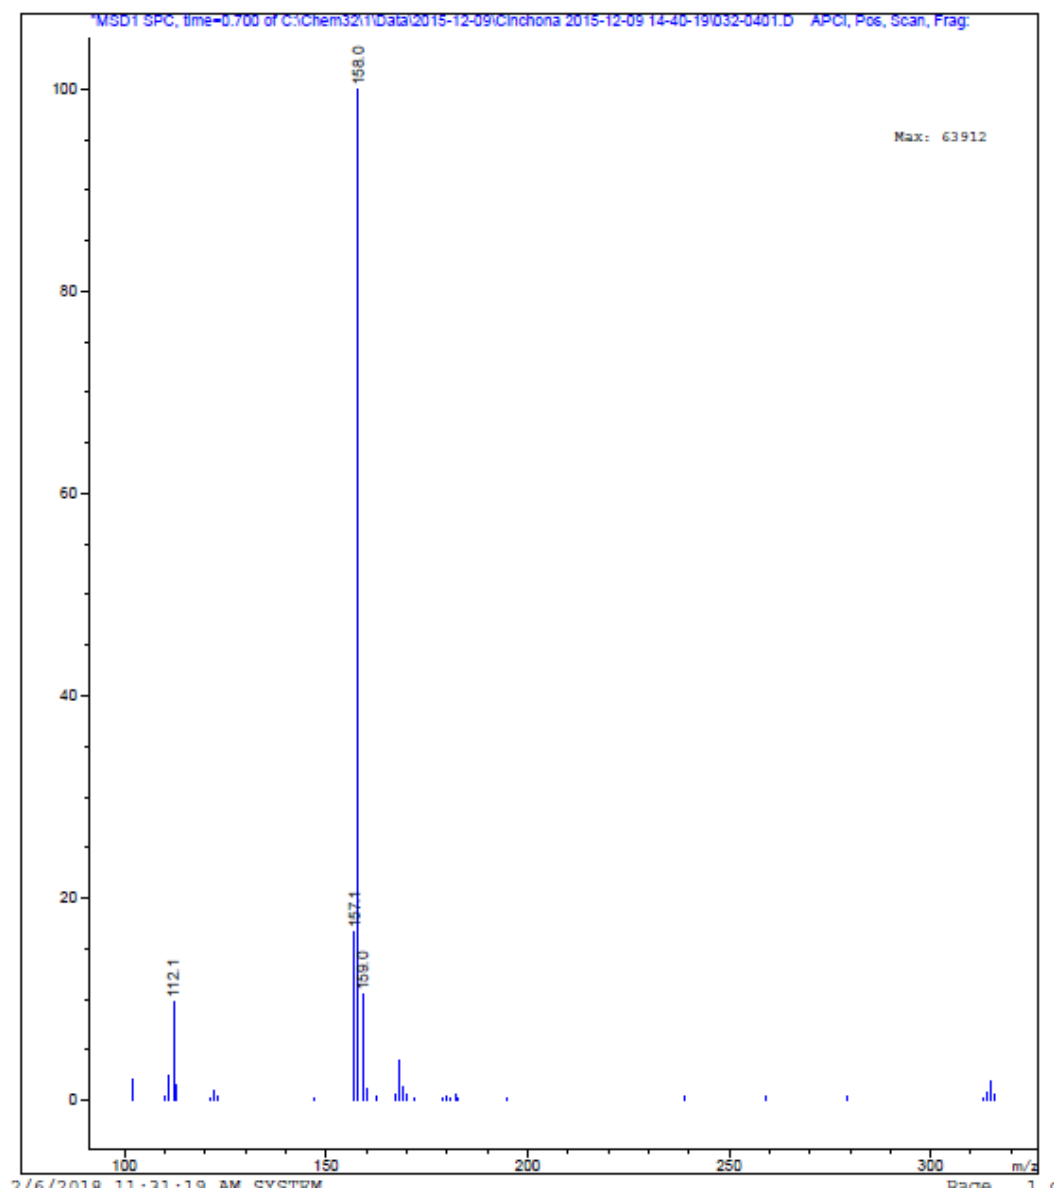



Figure S14. H-D exchange reaction of alanine

(20mg of Pd/C, MW, 120 °C, 60min)

a.  $^1\text{H}$  NMR

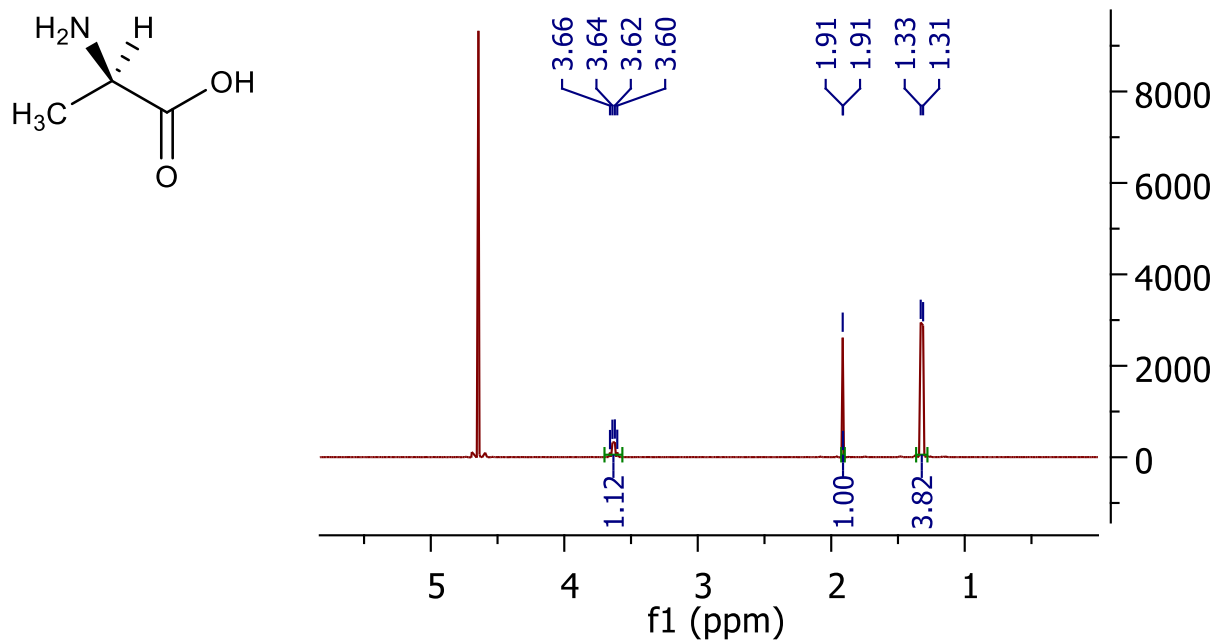

100mg Al

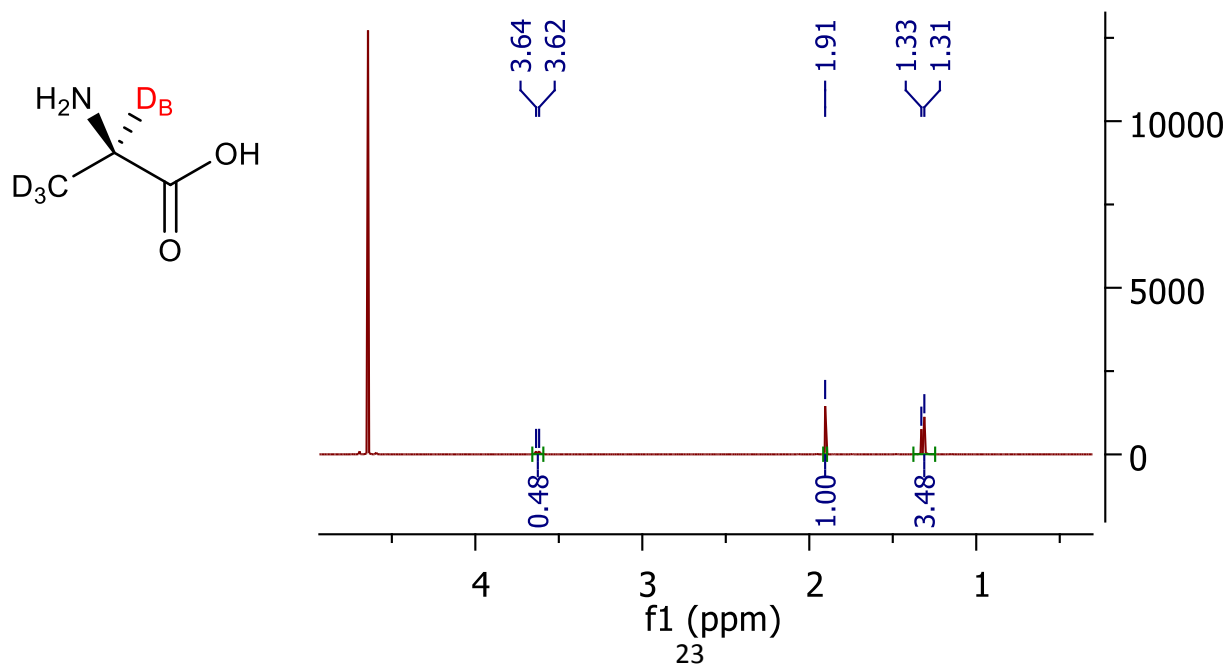

25mg AI (40% yield)

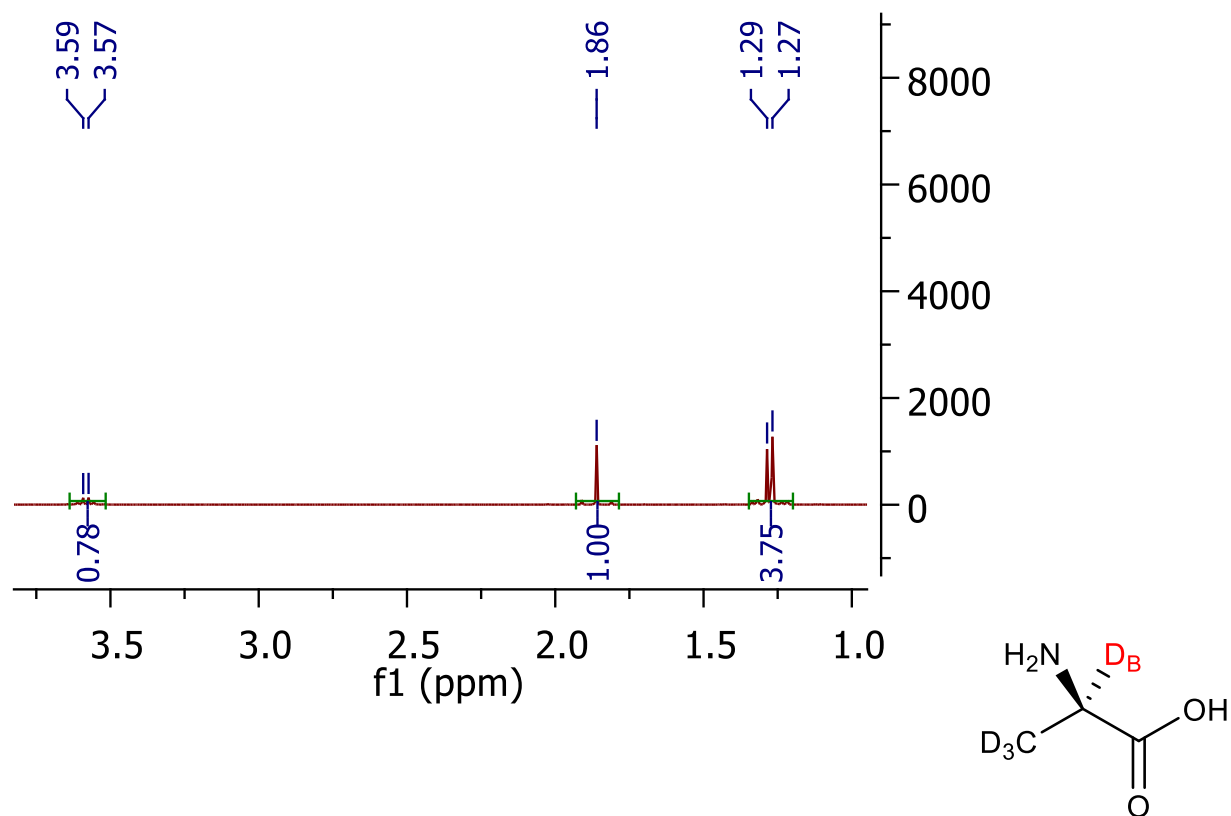

b.  $^2\text{H}$  NMR

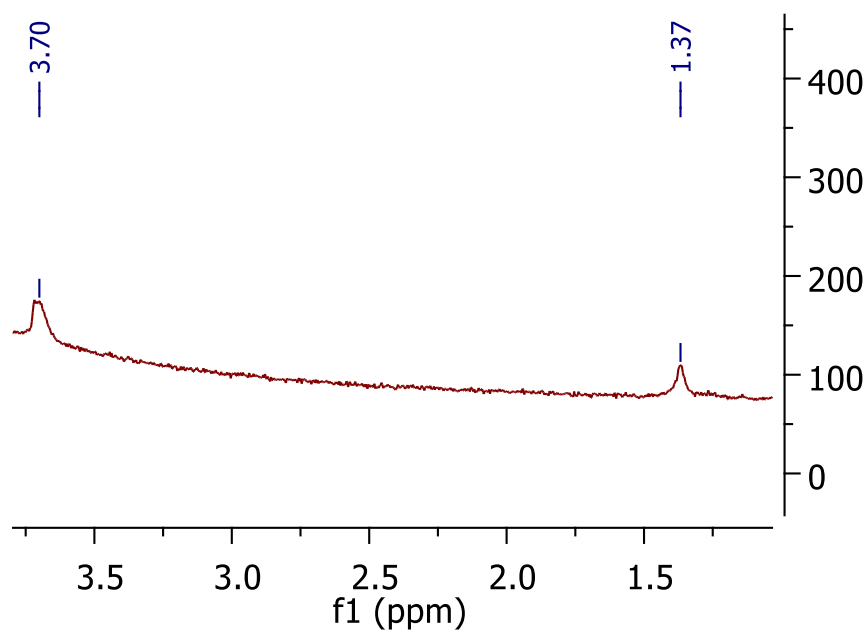

### c. Mass spectrum

#### $d_1$ -L-alanine/ $d_4$ -L-alanine

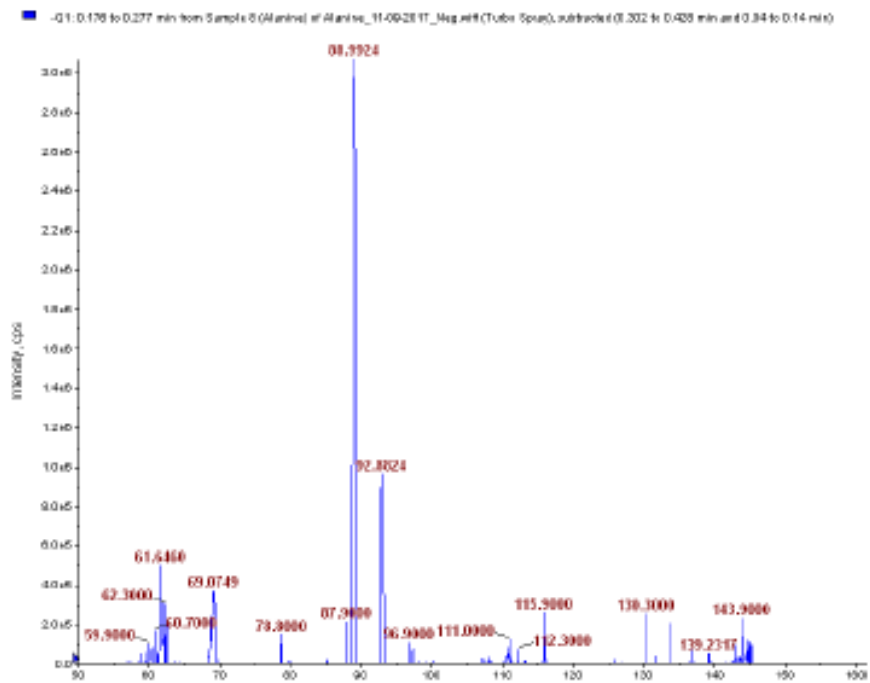

#### Non-deuterated L-alanine

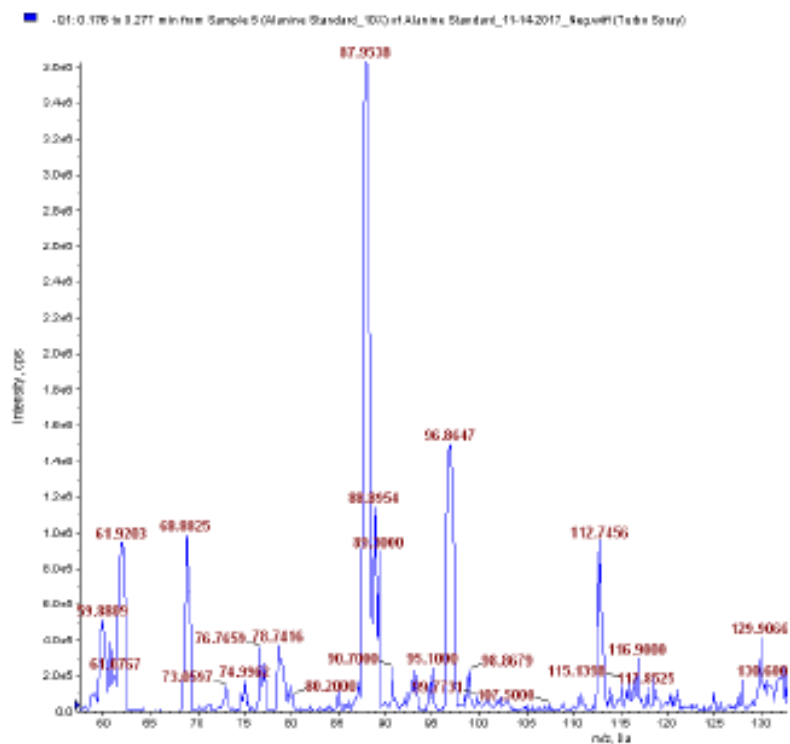

**Figure S15. Determination of the chirality of deuterated alanine**

Alanine was derivatized using isopropyl alcohol to form an amino acid ester first and then it was reacted with Mosher's chloride to functionalize the amino group; before it was injected in the GC-MS. The first chromatogram shows the separation of a pseudo racemic mixture of alanine. The mass spectrum of both products was identical. The second chromatogram corresponds to the derivatized d<sub>2</sub>-alanine.

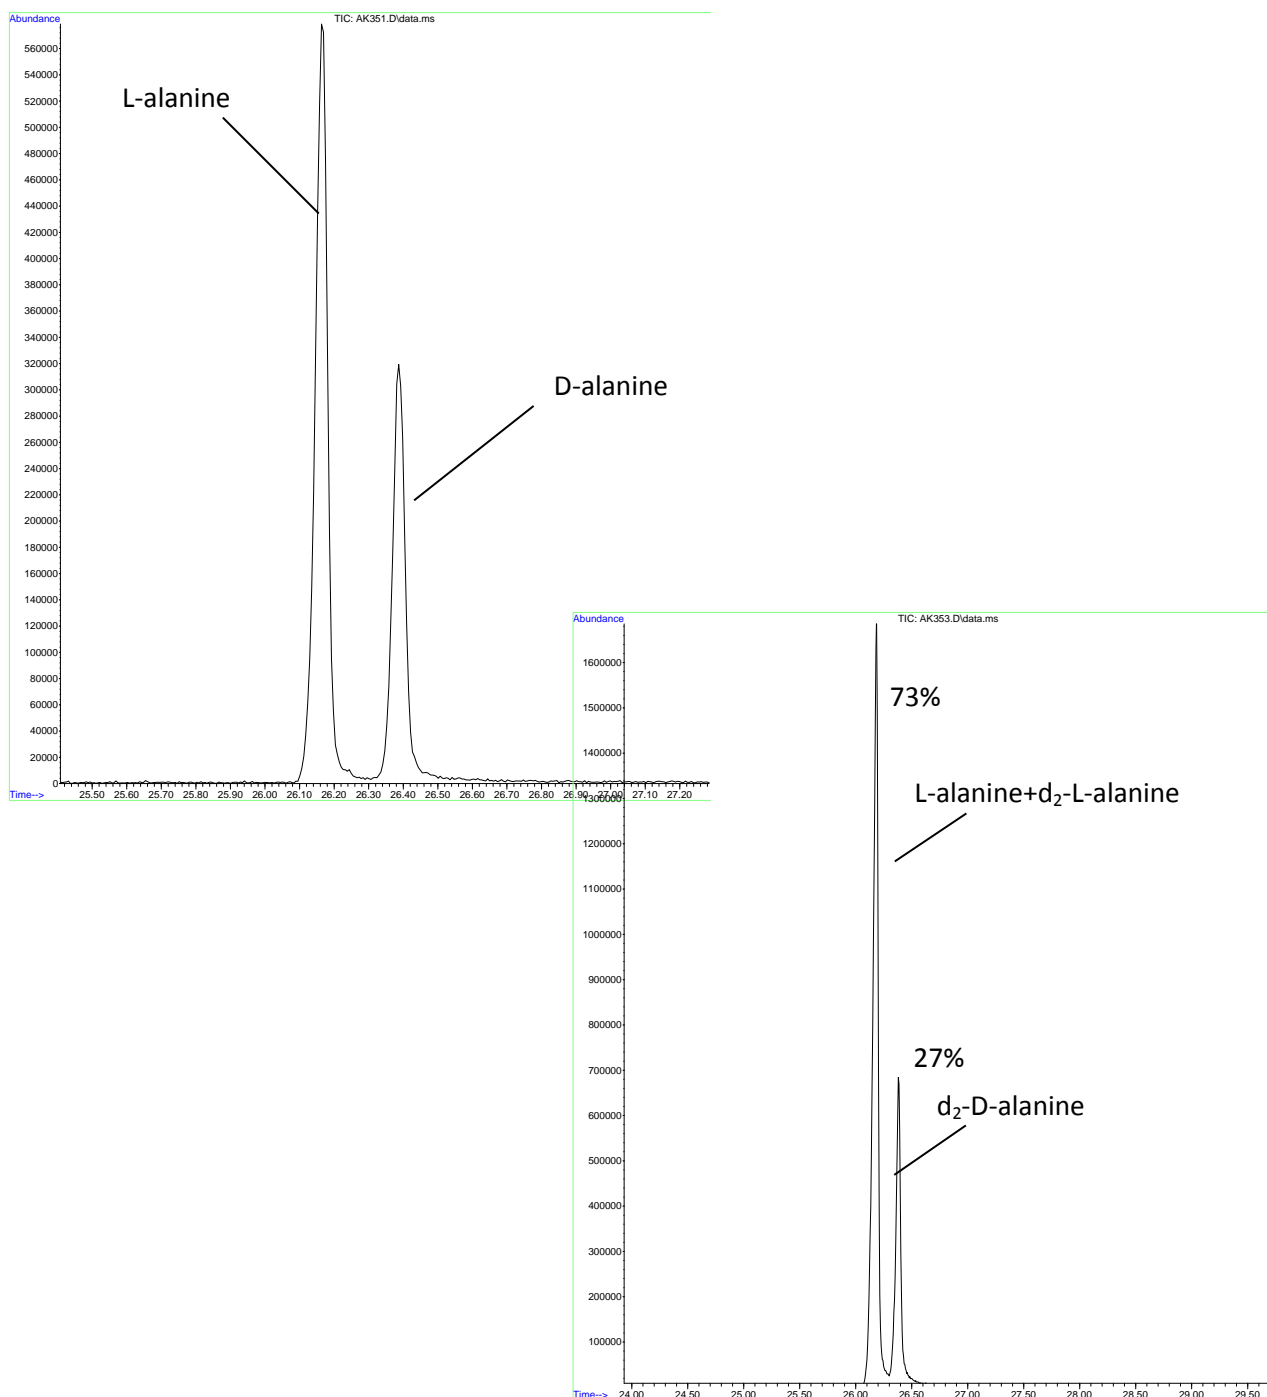

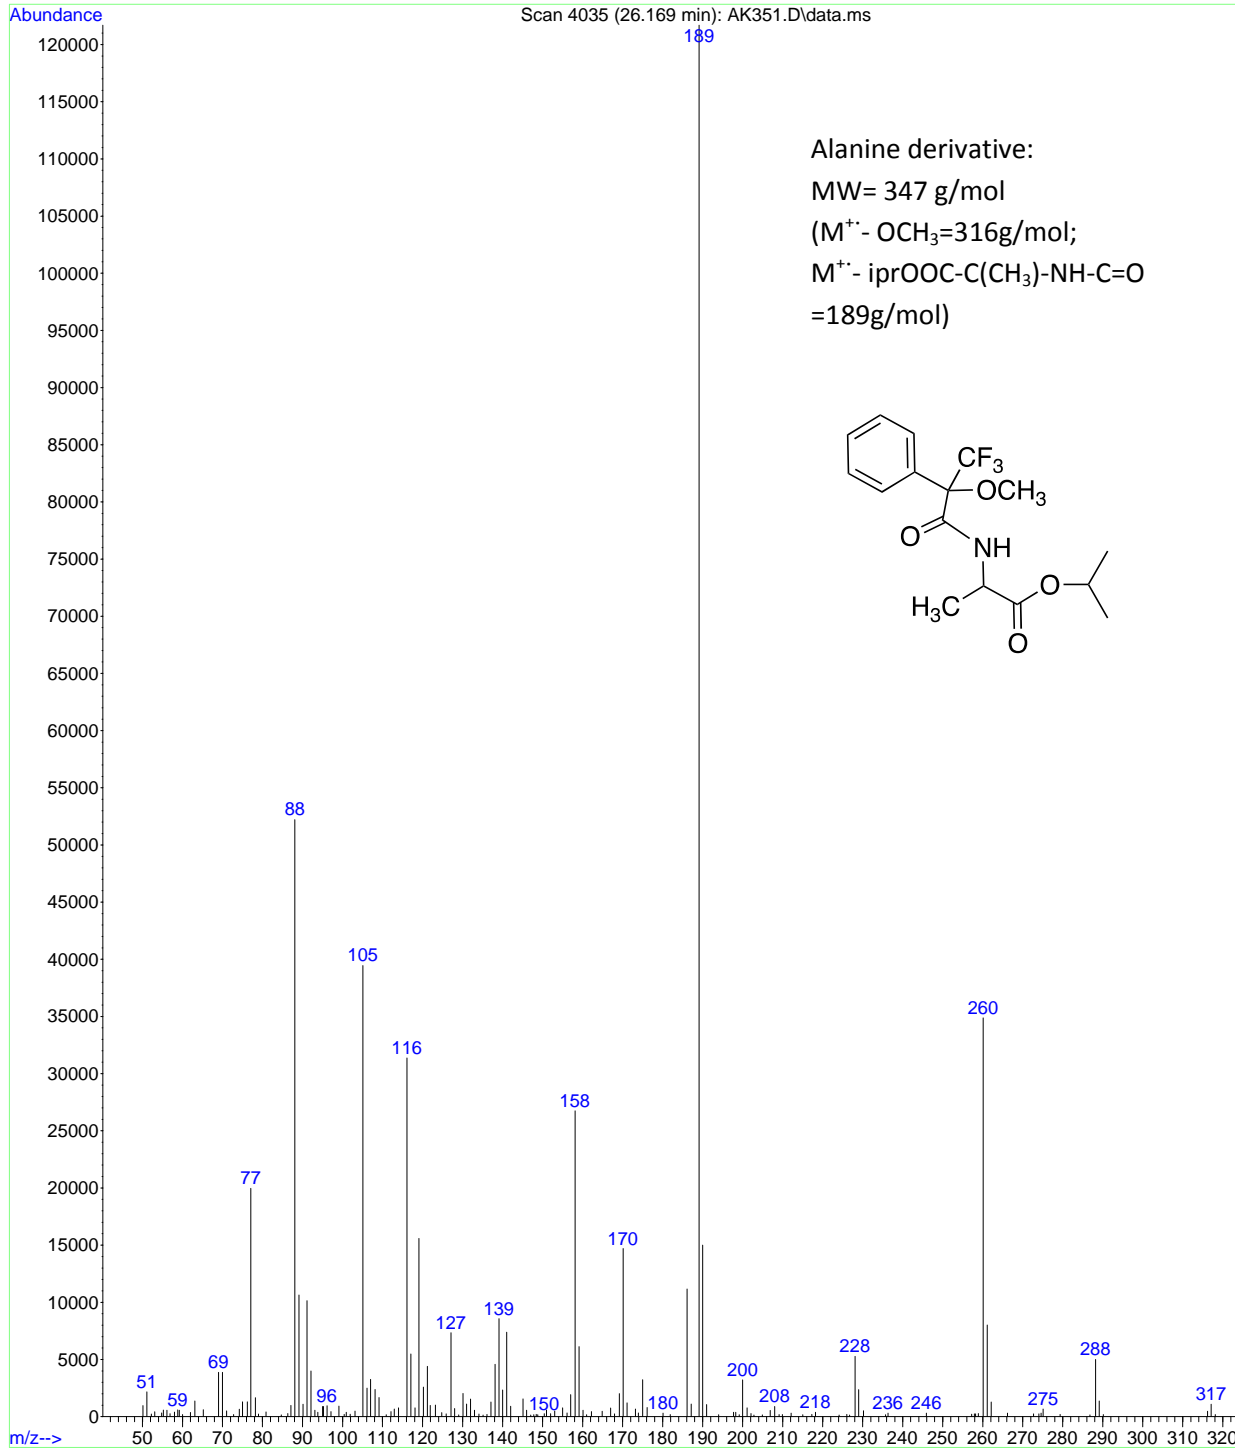

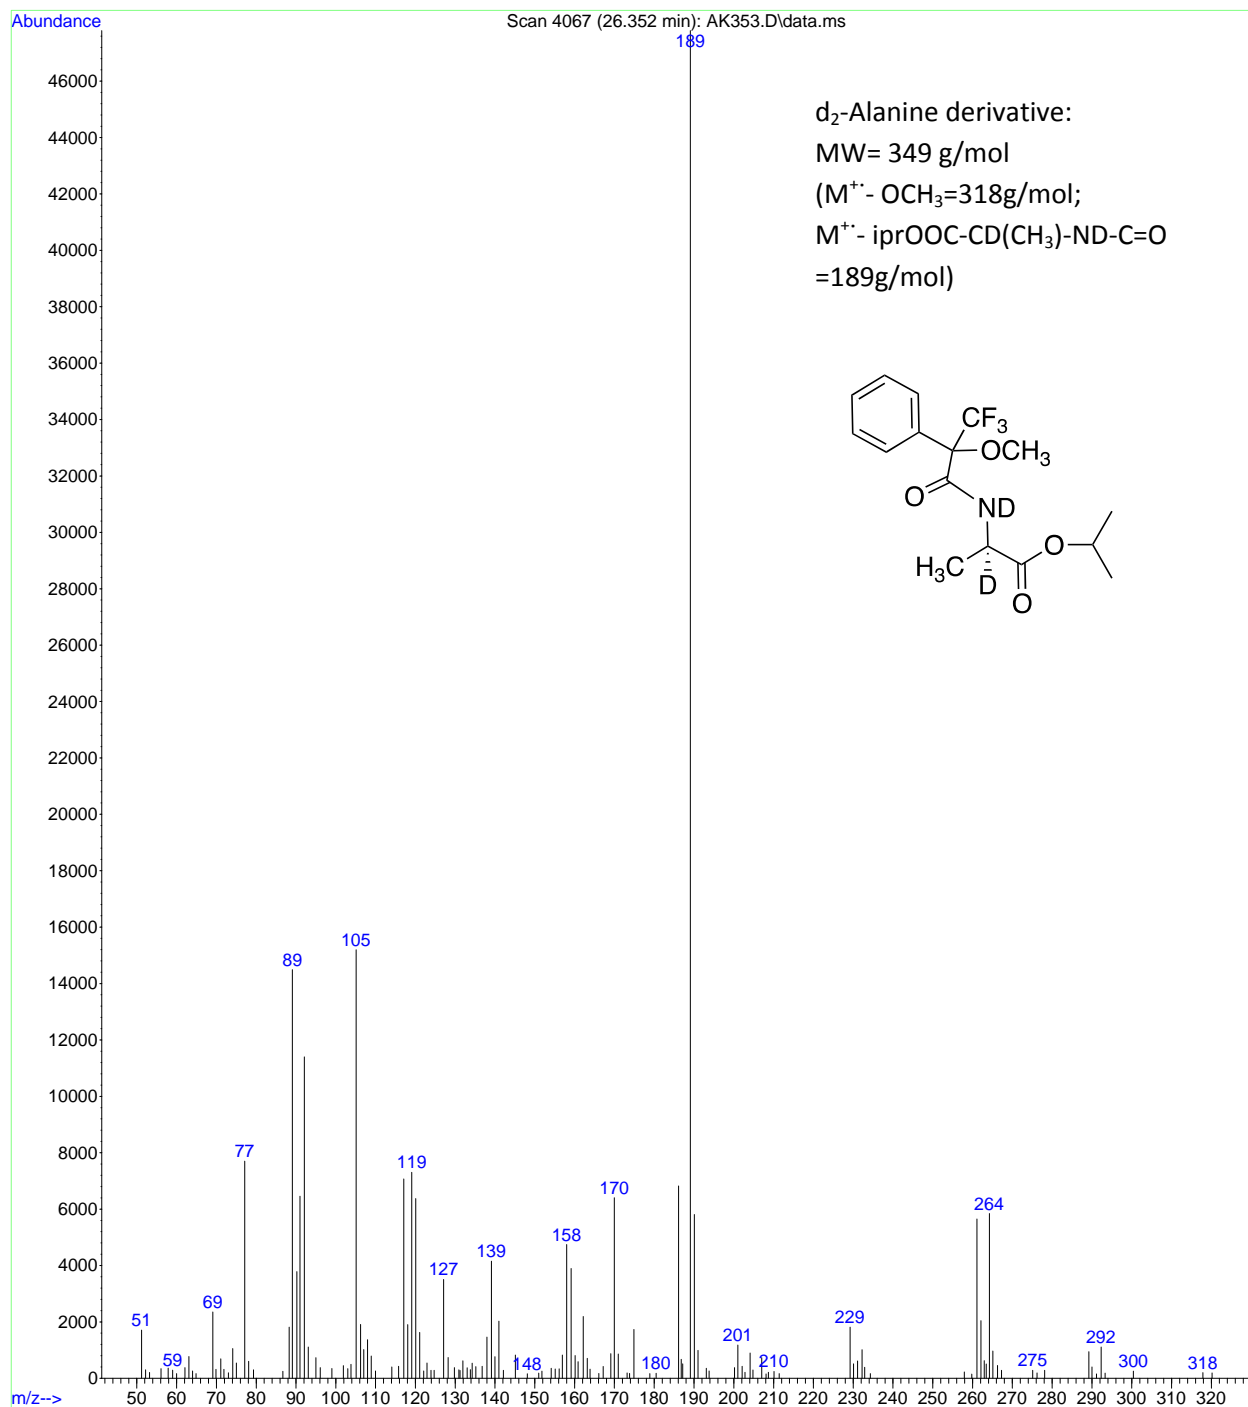

Figure S16. H-D exchange reaction of ethylaniline

(20mg of Pd/C, MW, 60 °C)

a.  $^1\text{H}$  NMR

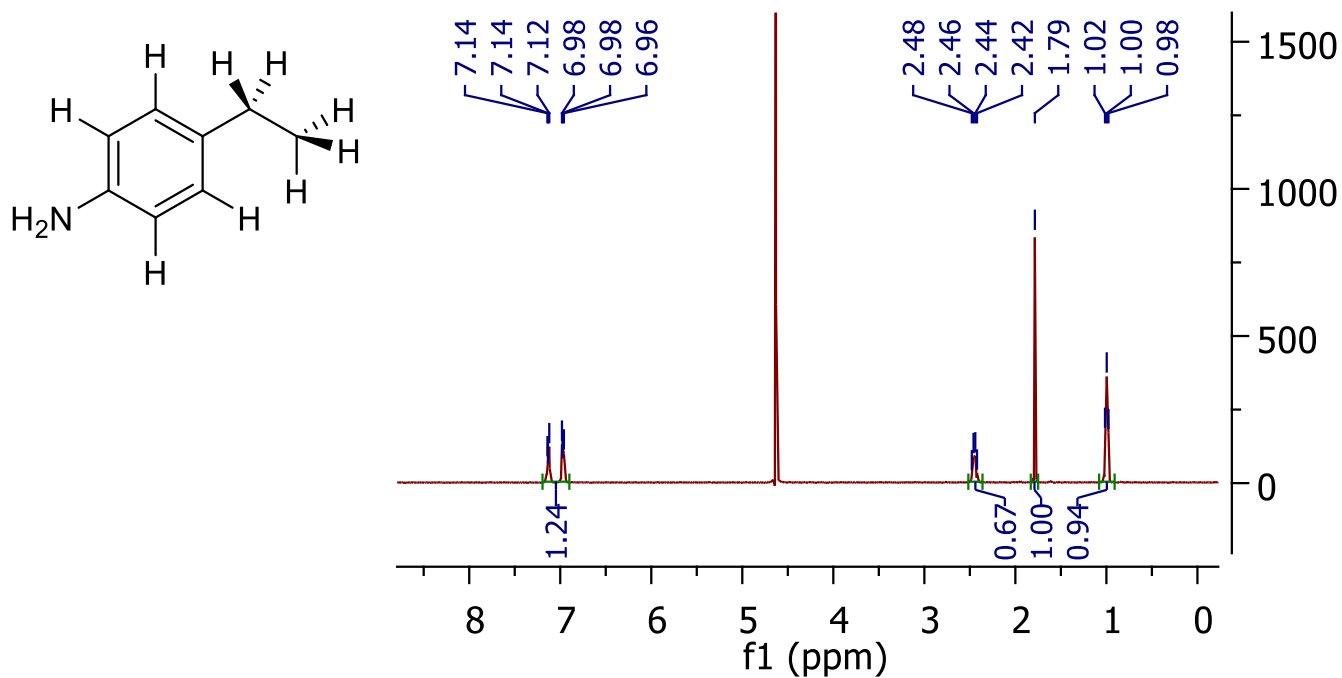

100mg Al, 60min

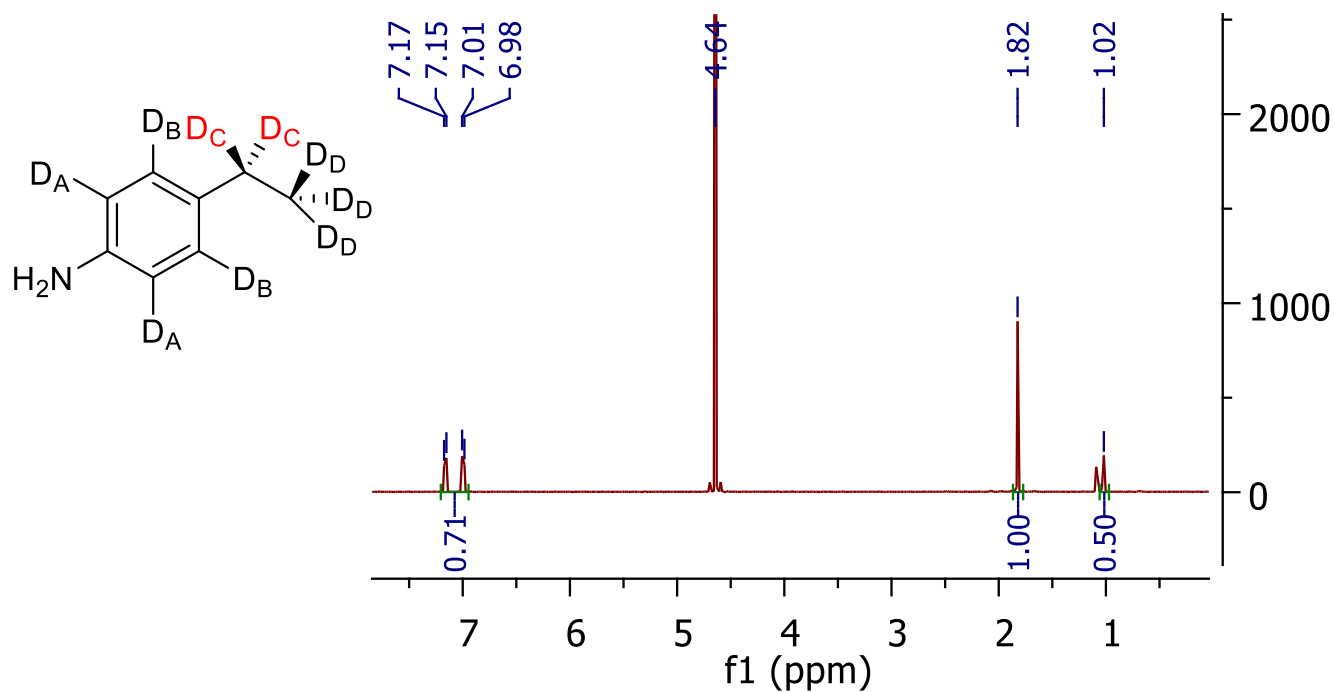

100mg Al, 20min

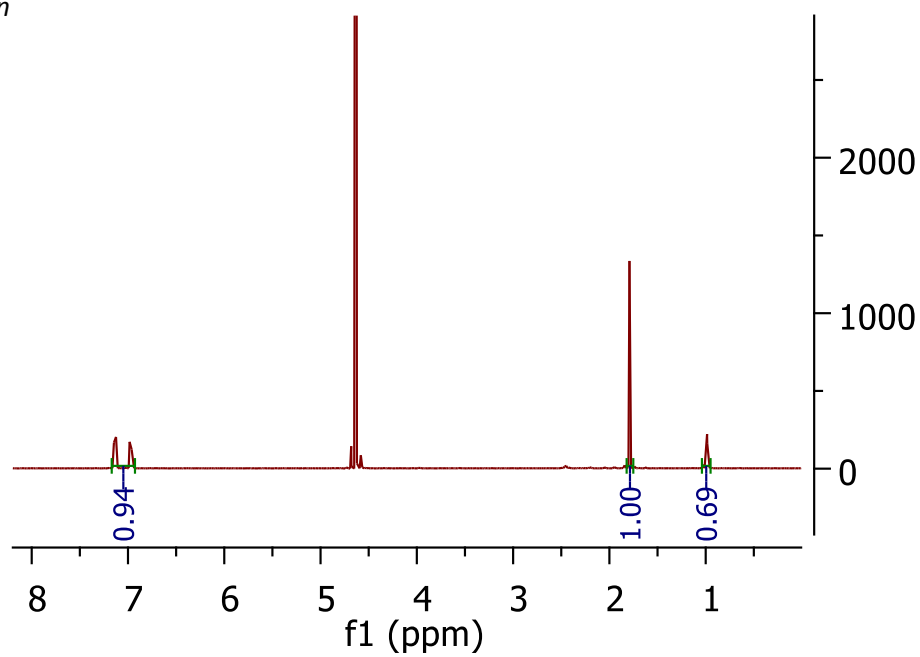

25mg Al, 20min

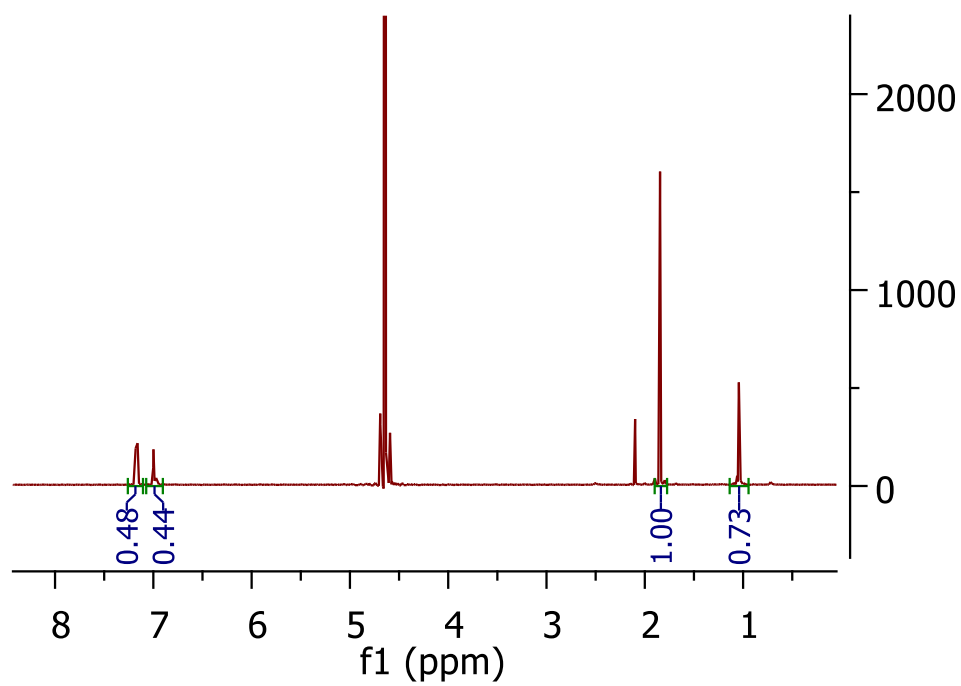



**b.  $^2\text{H}$  NMR**

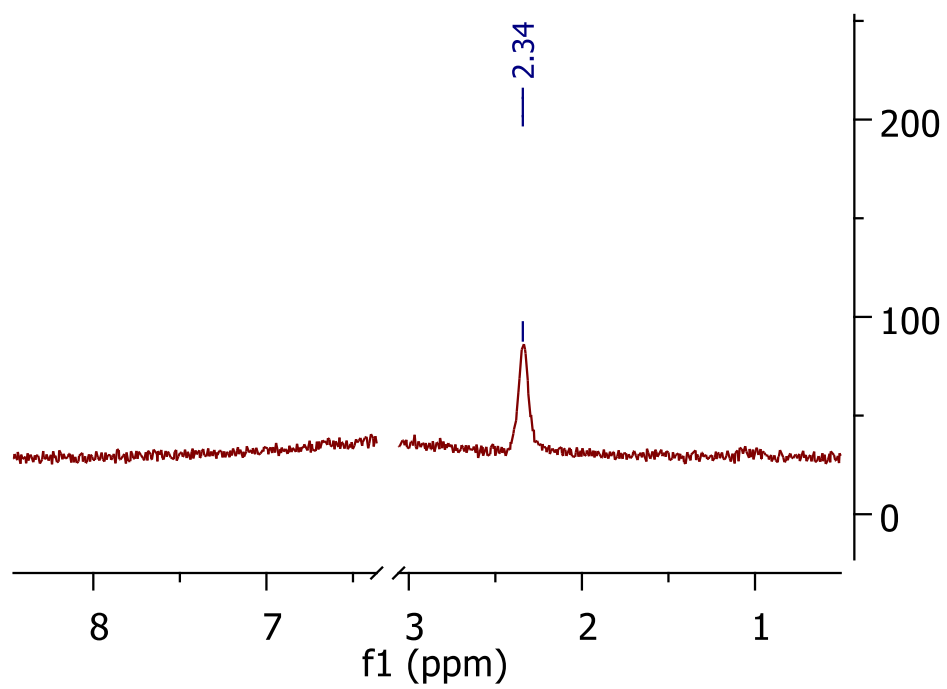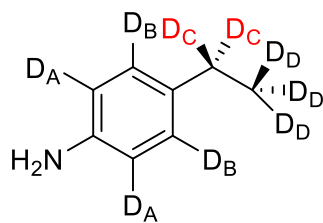

c. Mass spectrum

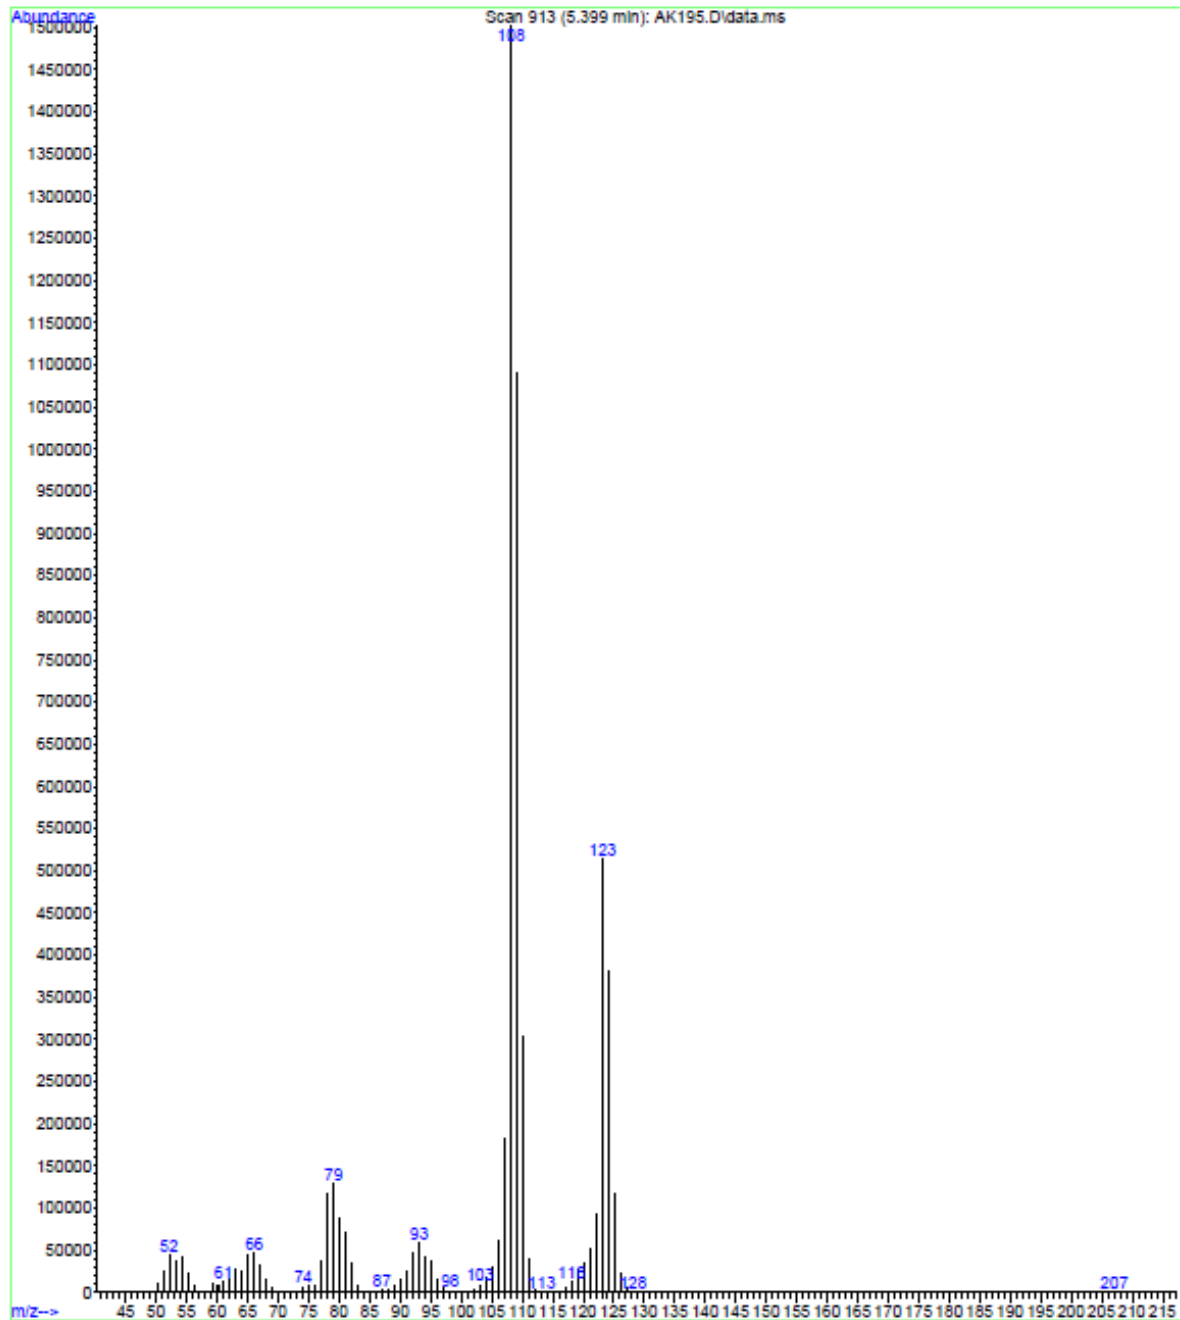

Figure S17. H-D exchange reaction of ethylenedianiline

(20mg of Pd/C, MW, 60min)

a.  $^1\text{H}$  NMR

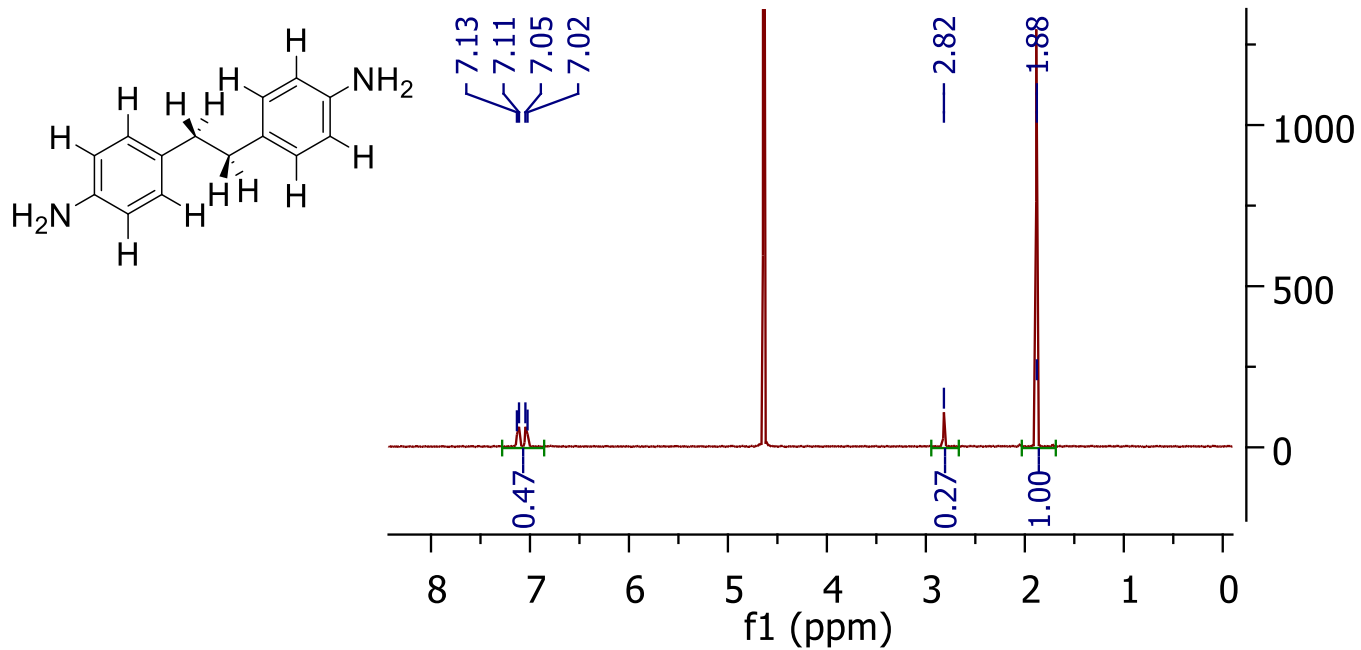

100mg Al, 80°C

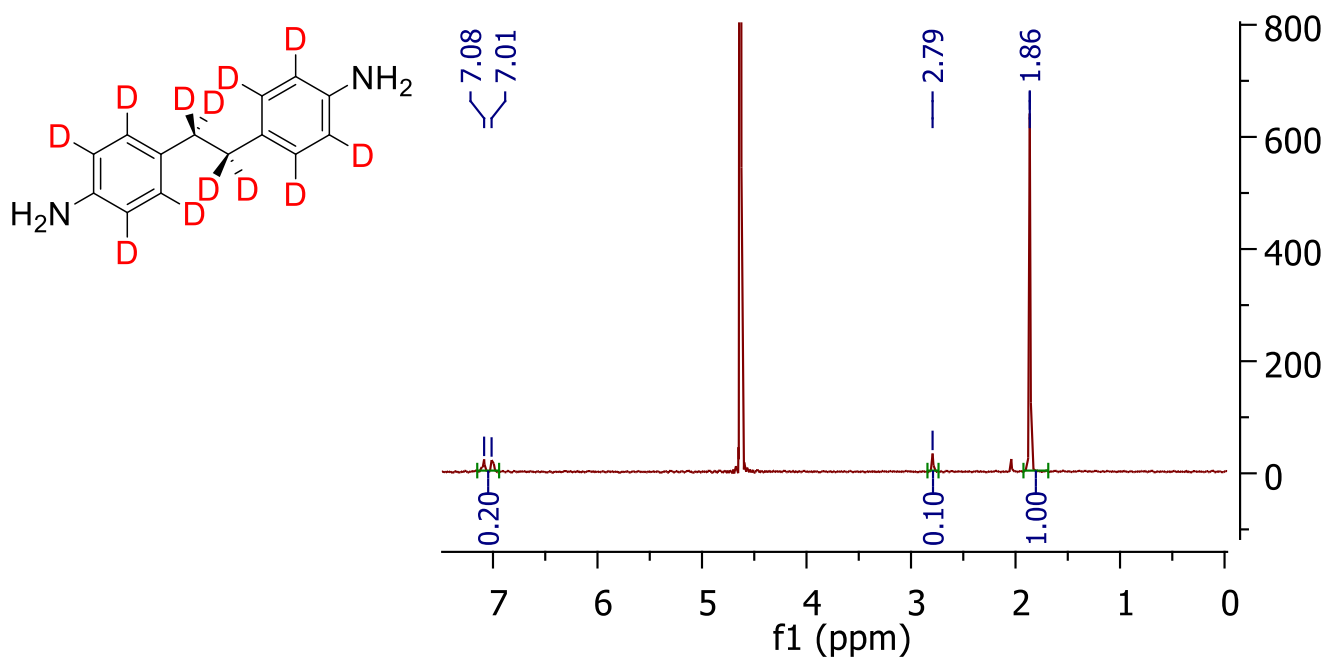

100mg of Al, 120 °C

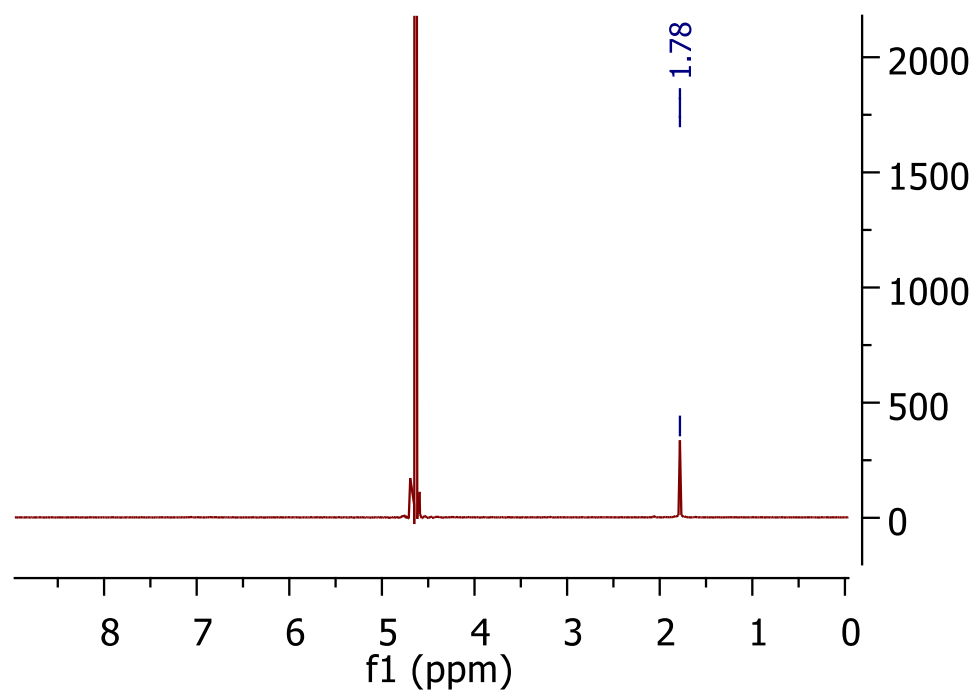

25mg Al, 120 °C

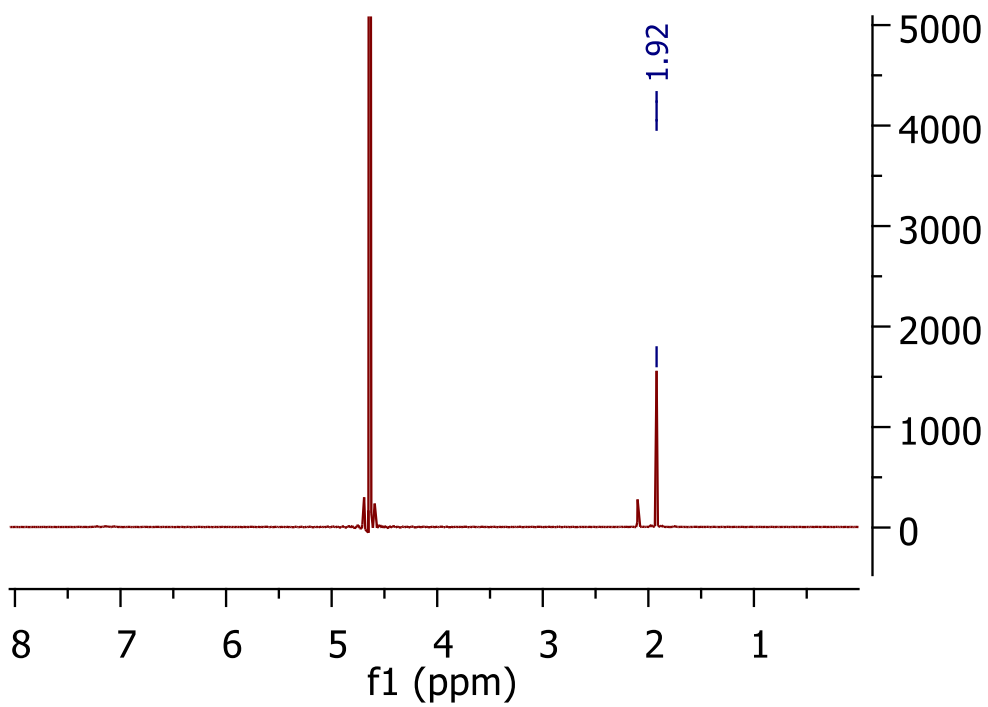

b.  $^2\text{H}$  NMR

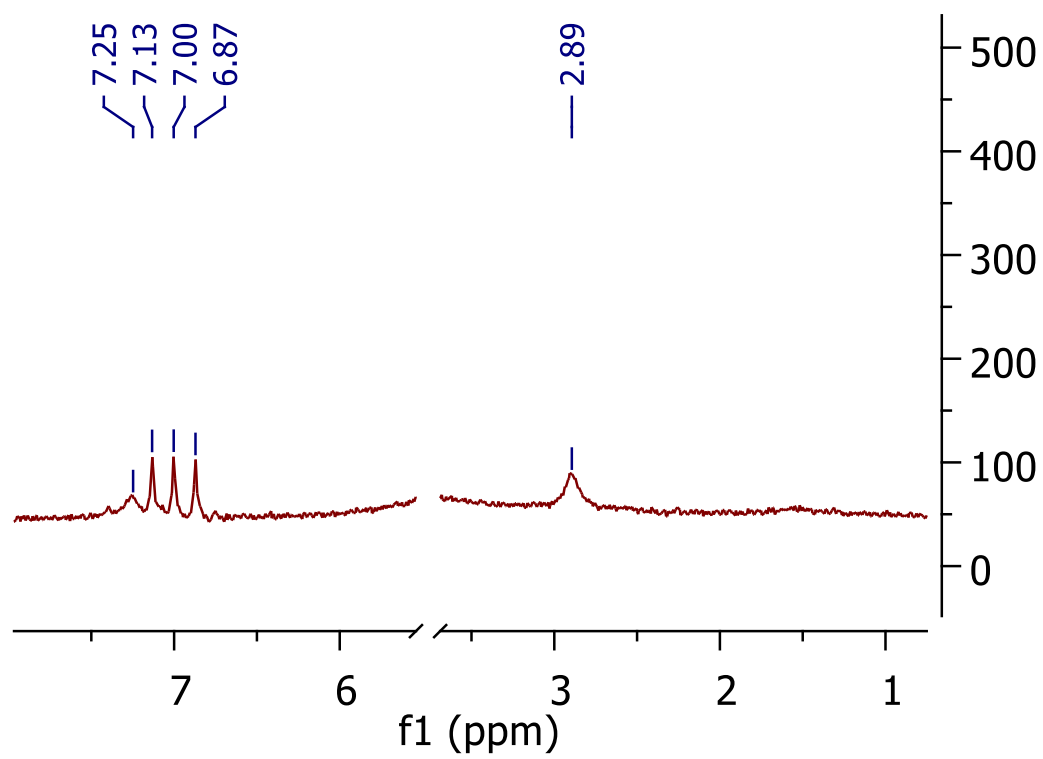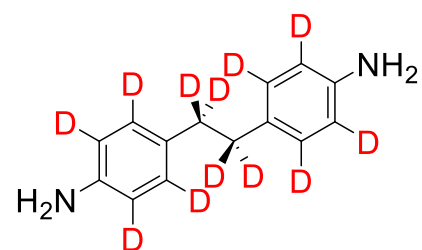

c. Mass spectrum

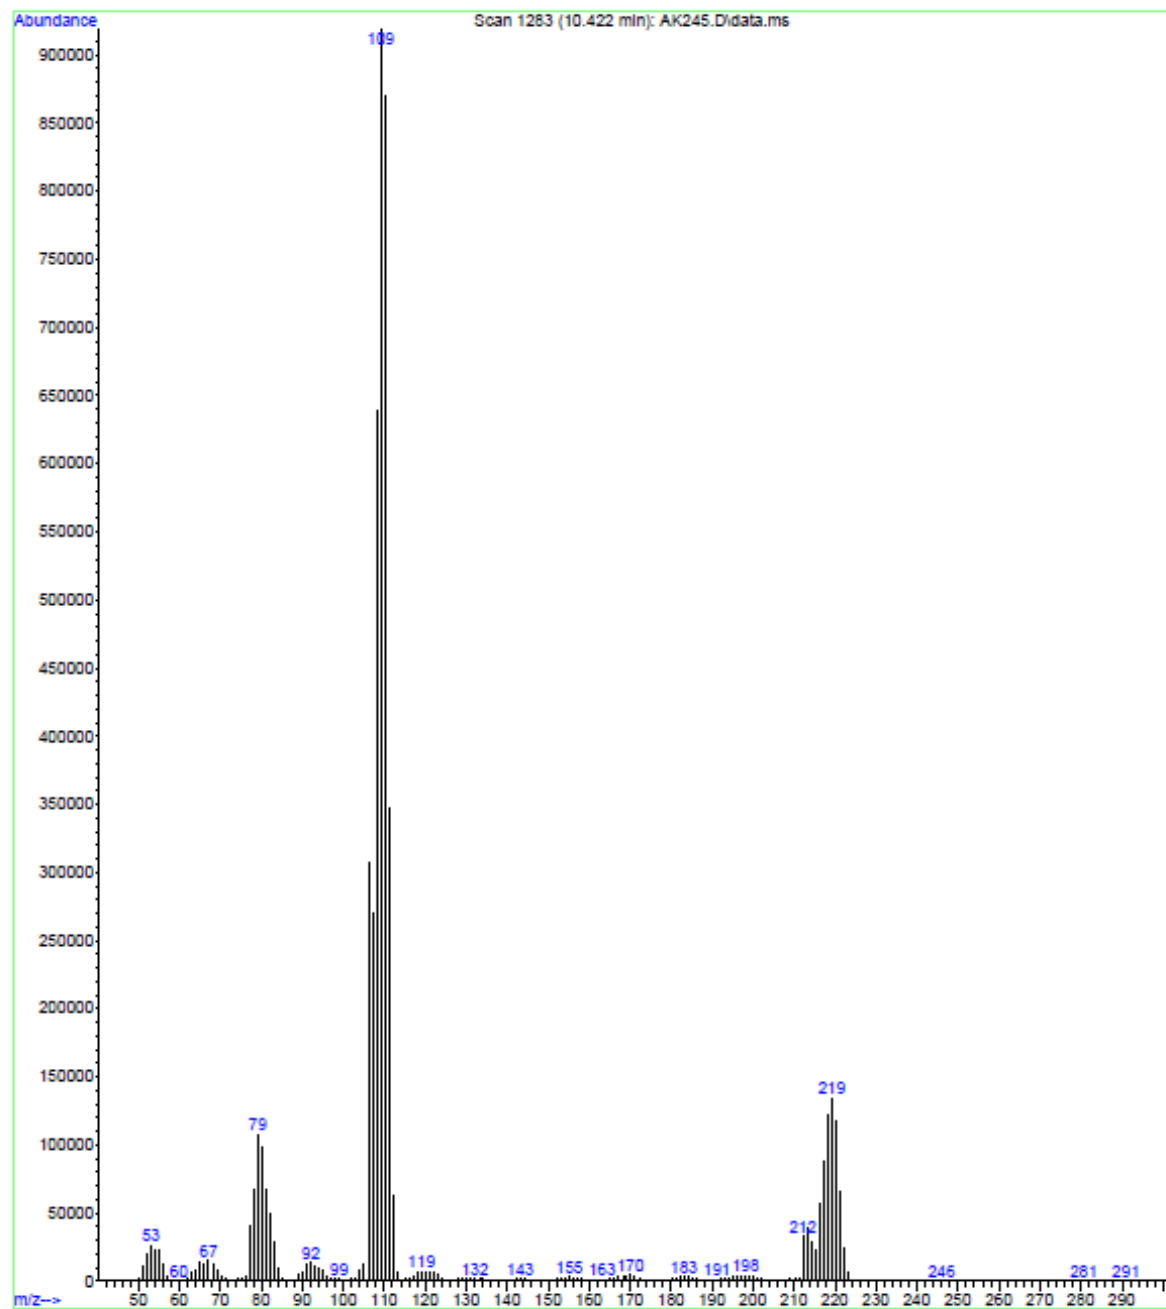

Figure S18. H-D exchange reaction of 2-phenylethylamine

(20mg of Pd/C, MW, 60min, 80°C)

a.  $^1\text{H}$  NMR

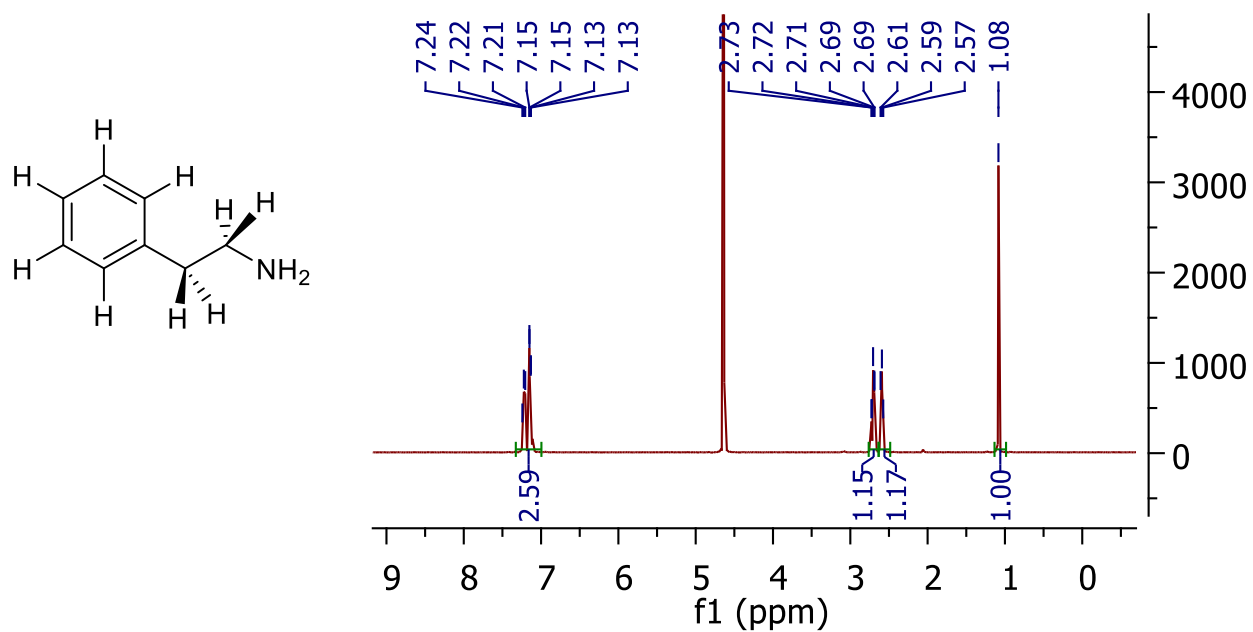

100mg Al

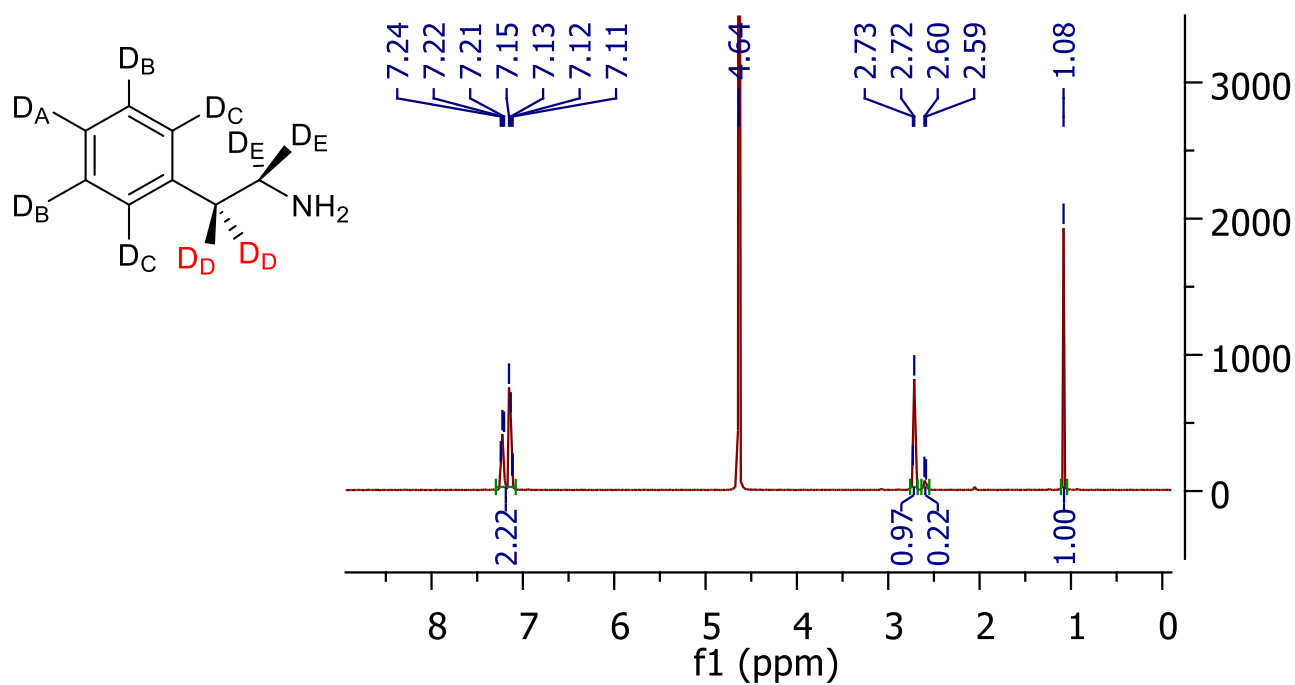

25mg Al

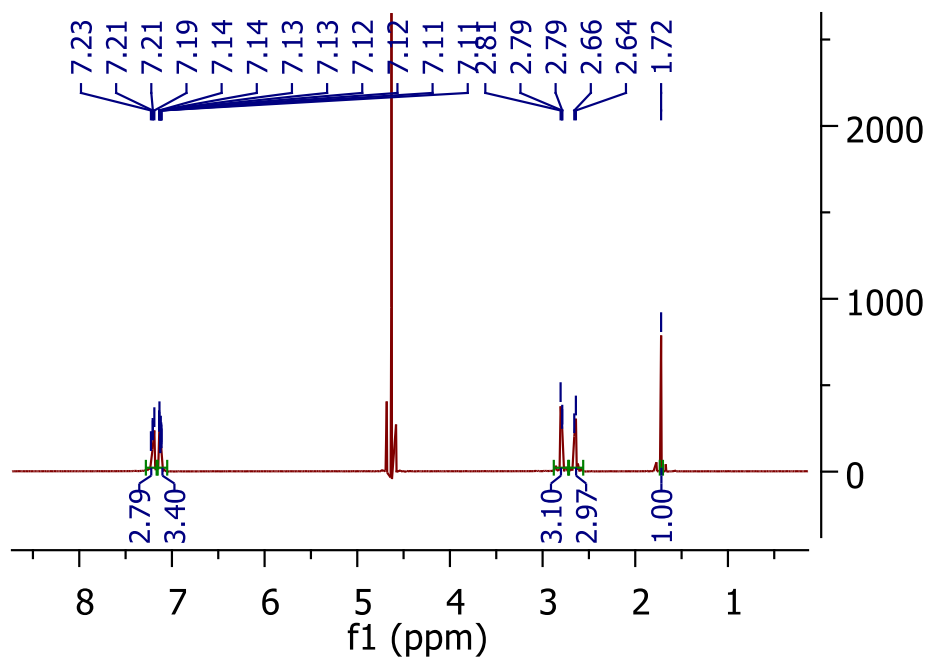

Reference

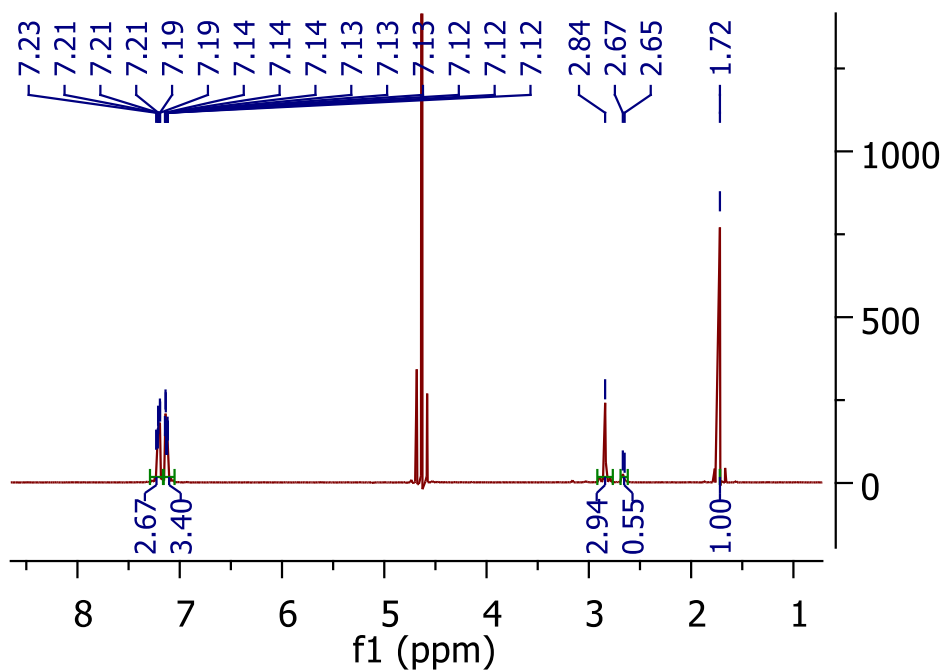



b.  $^2\text{H}$  NMR

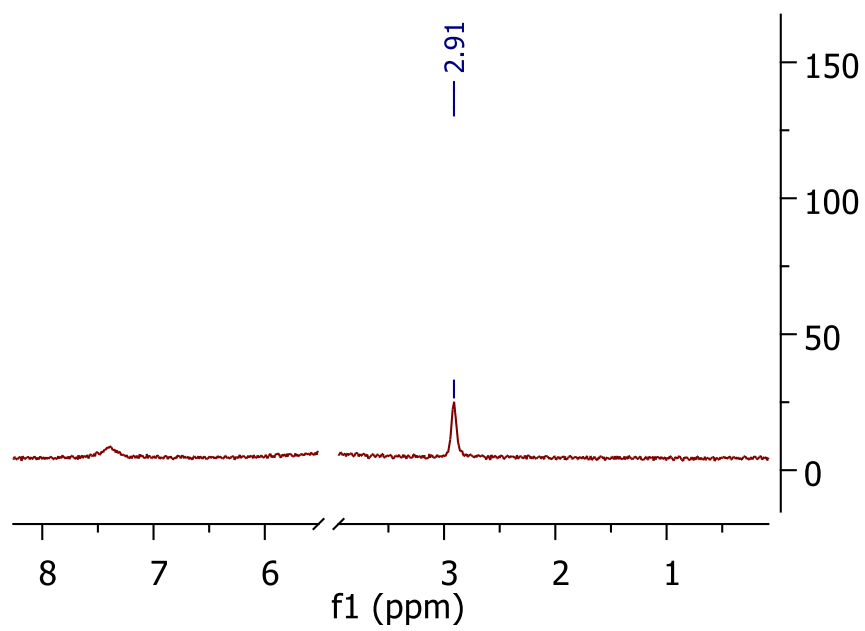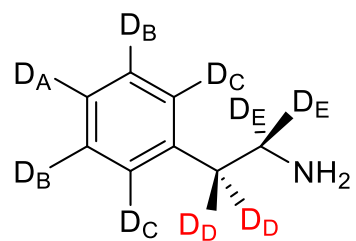

c. Mass spectrum

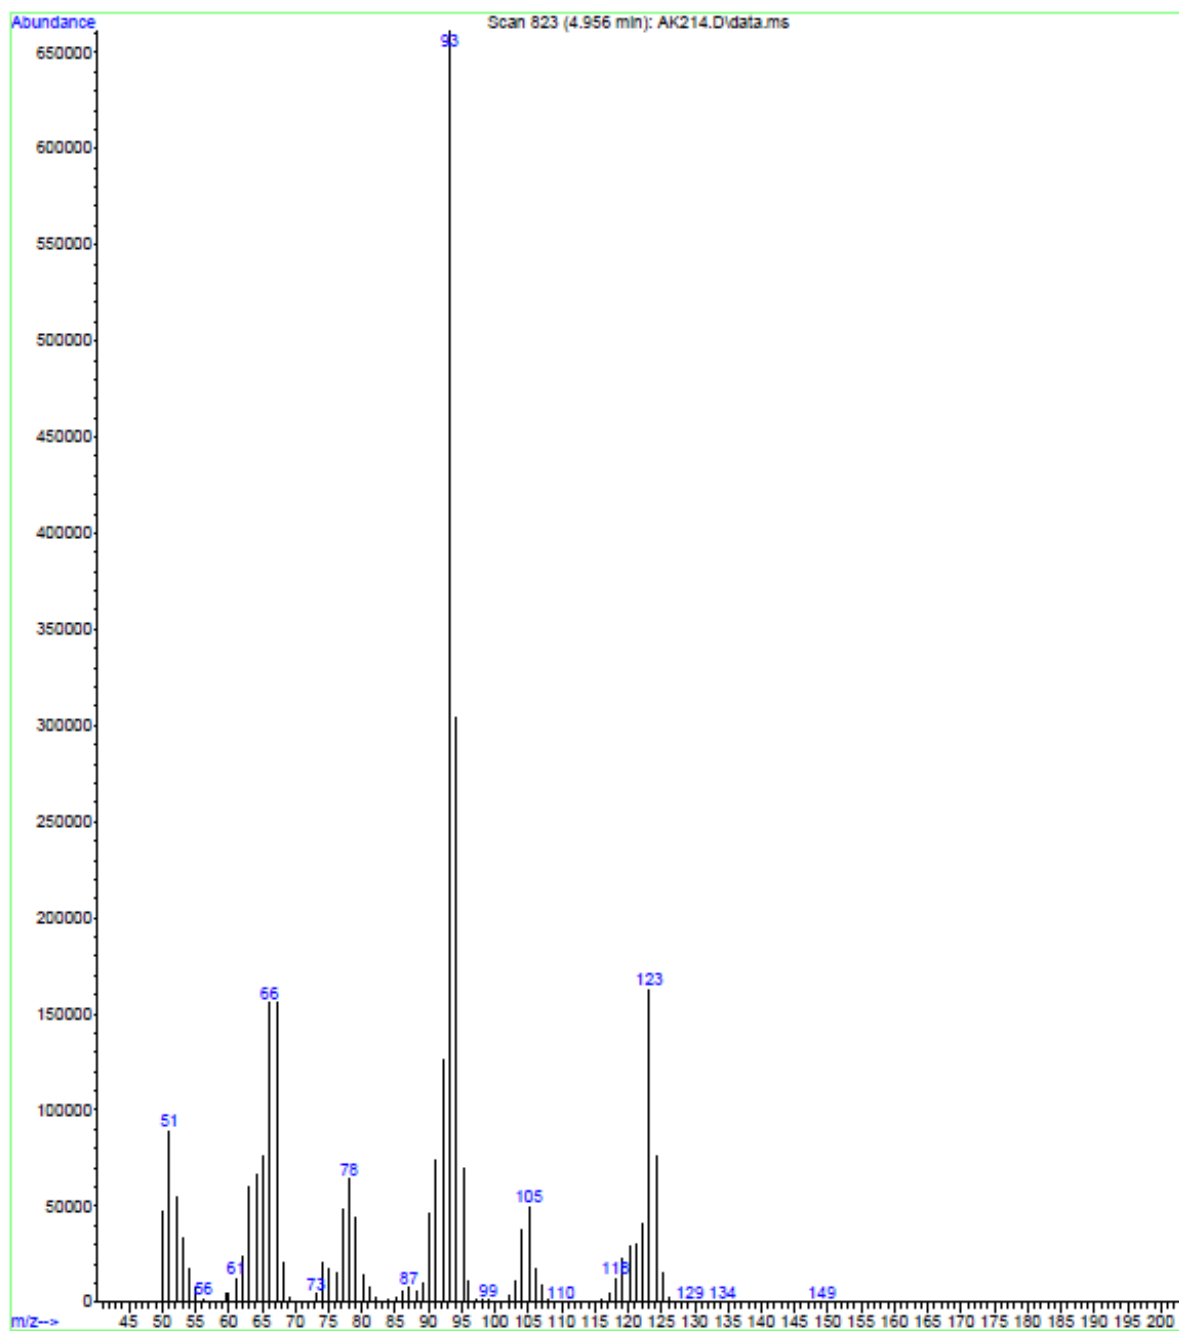

Figure S19. H-D exchange reaction of diethyl malonate

(20mg of Pd/C, MW, 60min, 100°C)

a.  $^1\text{H}$  NMR

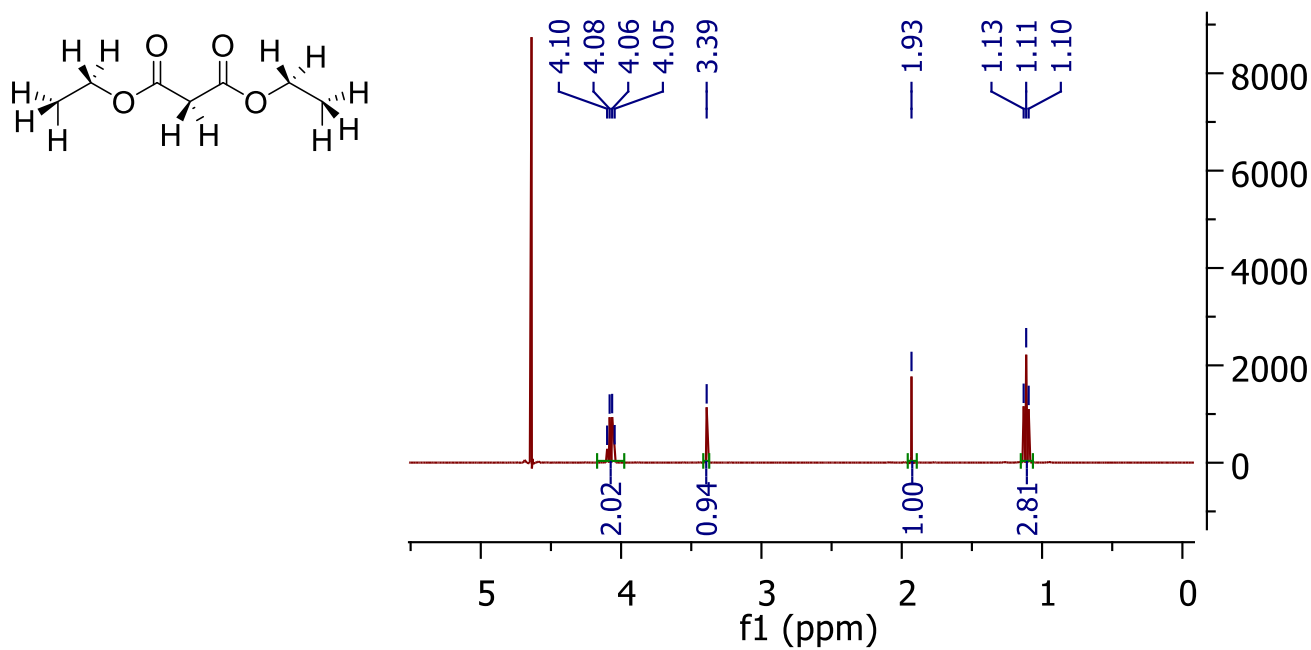

100mg Al

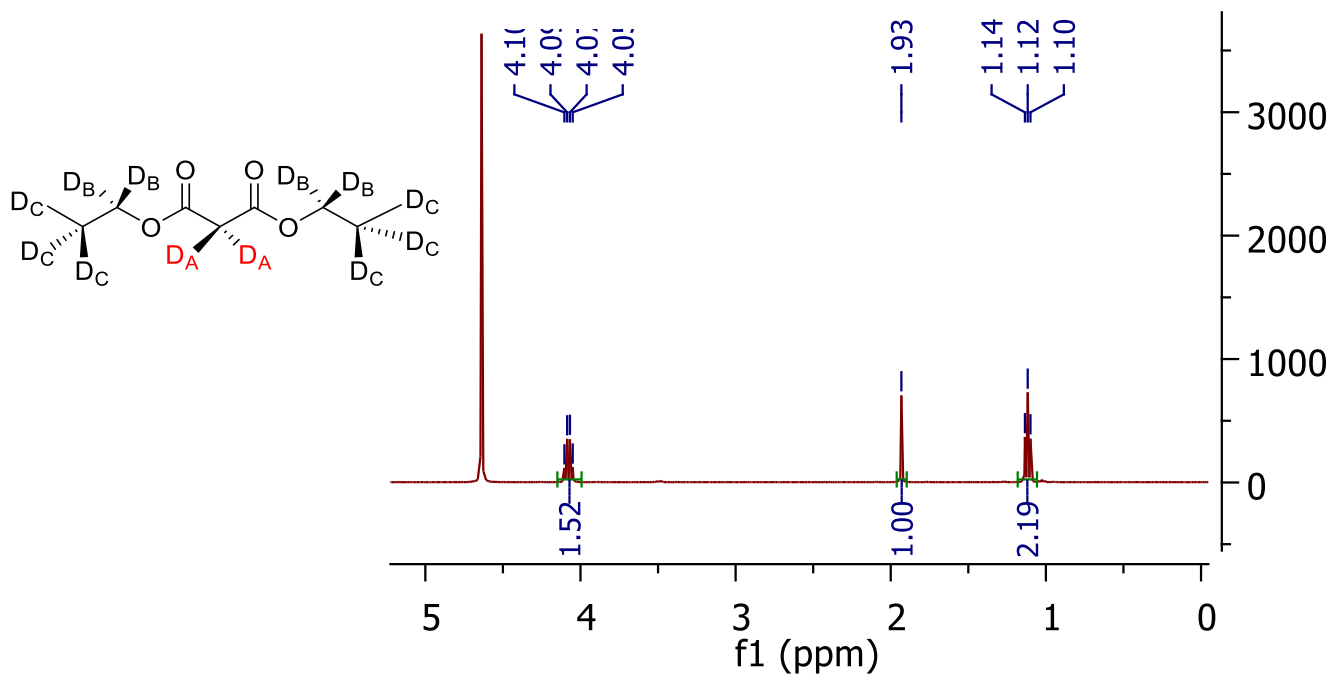

25mg Al (same yield)

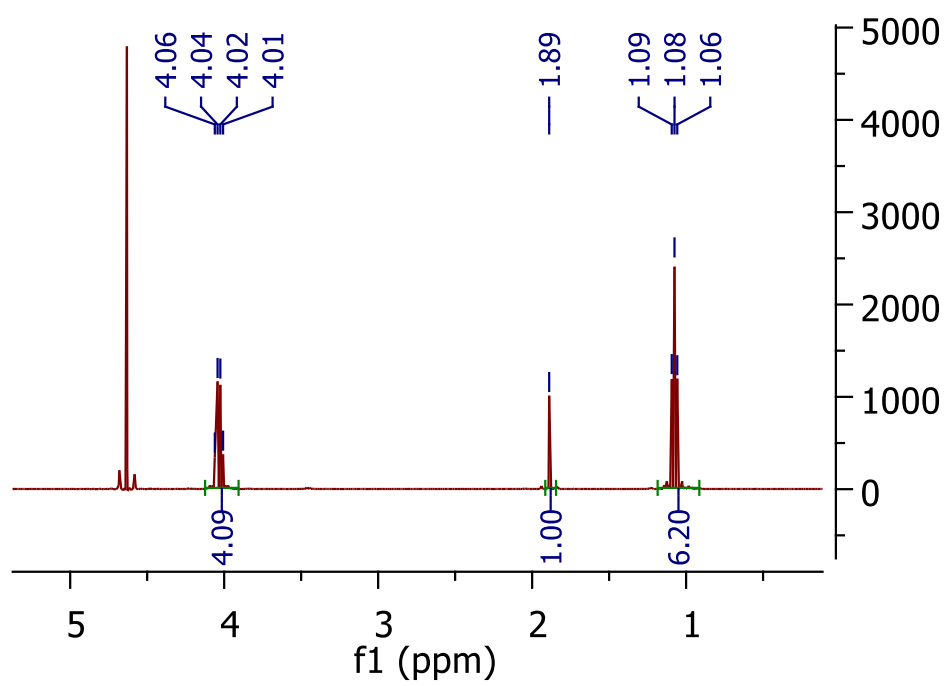

b.  $^2\text{H}$  NMR

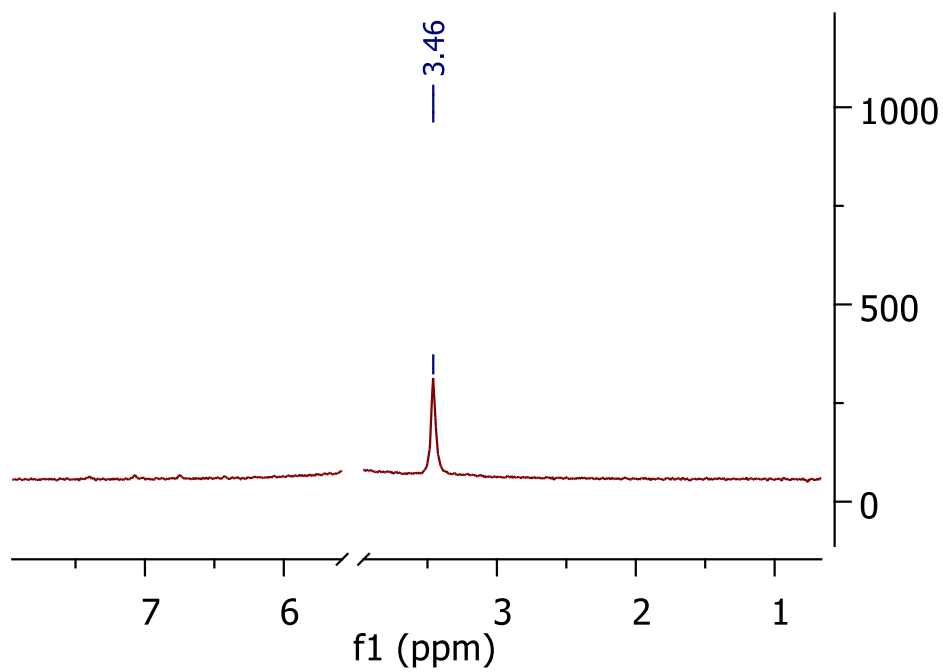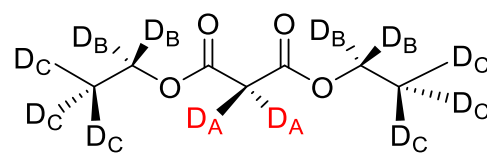

c. Mass spectrum

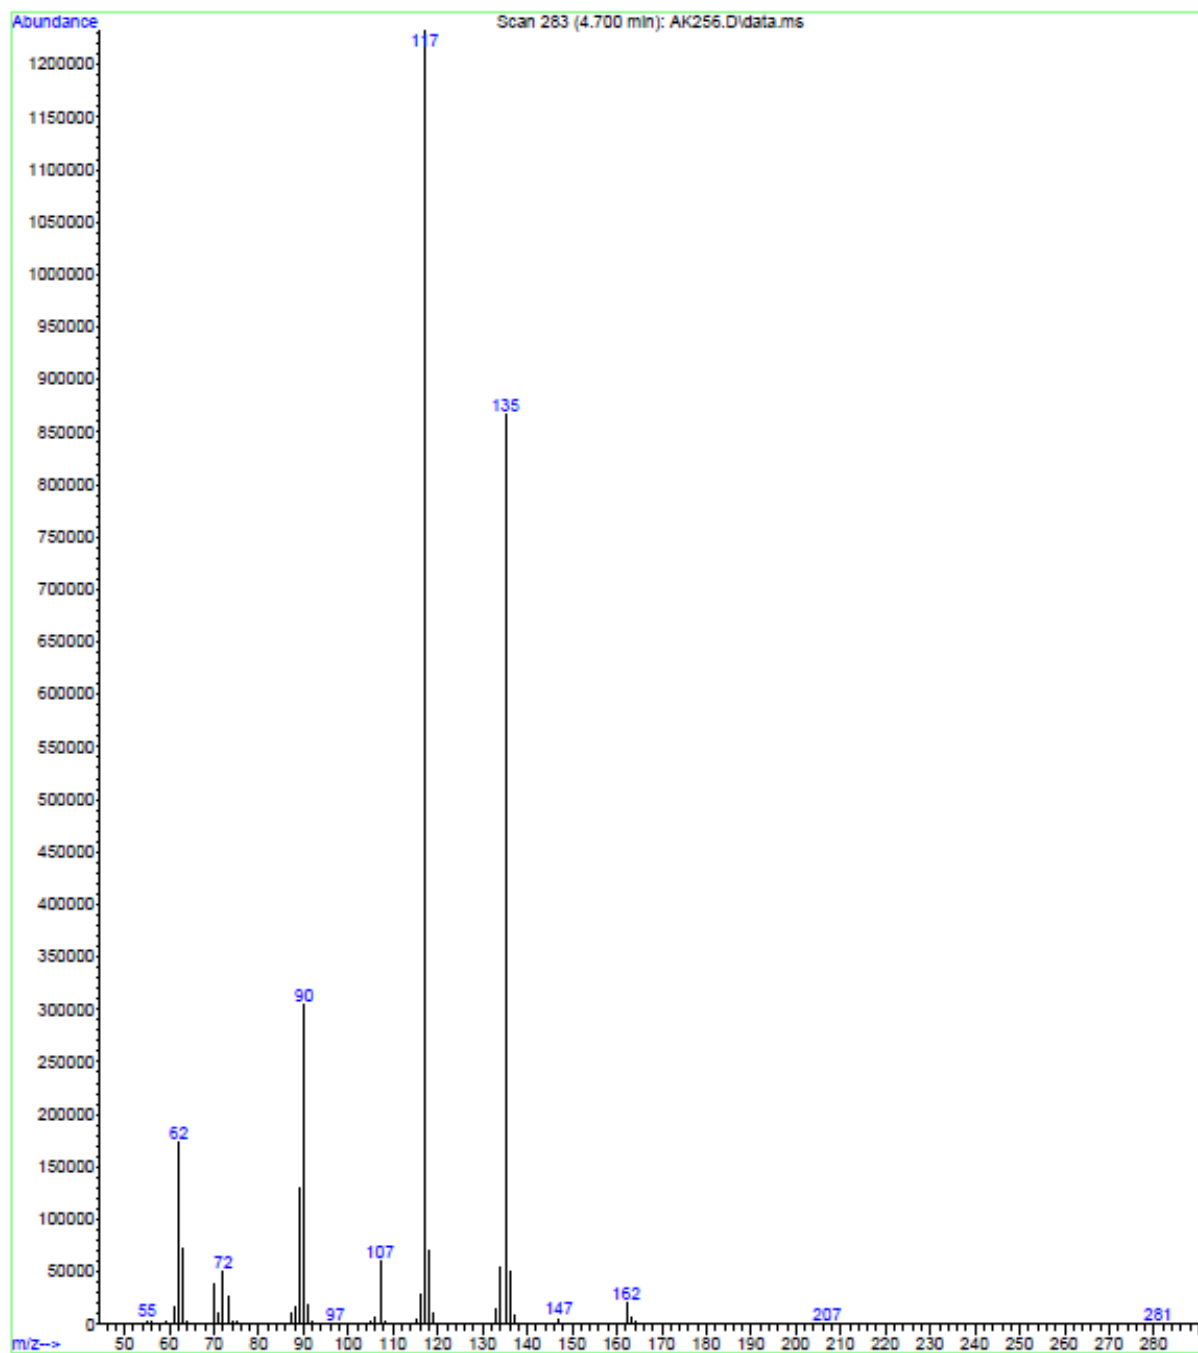

Figure S20. H-D exchange reaction of diethylmethyl malonate

(20mg of Pd/C, MW, 60min, 80°C)

a.  $^1\text{H}$  NMR

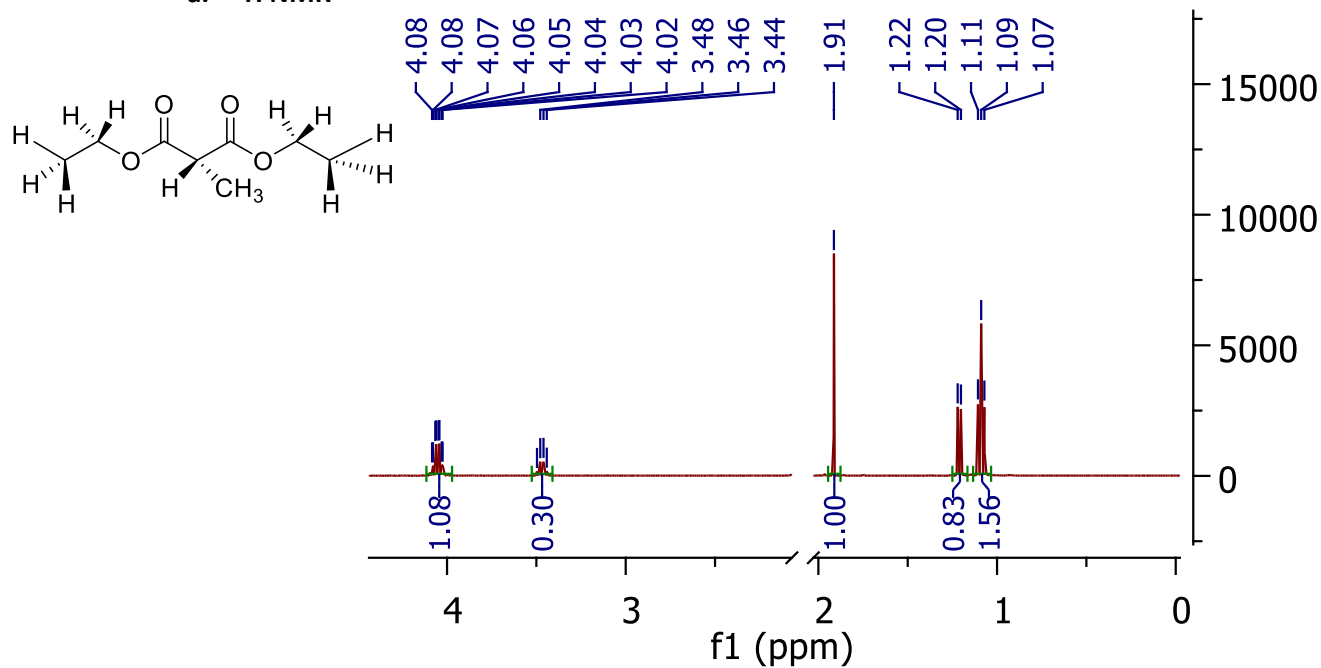

100mg Al

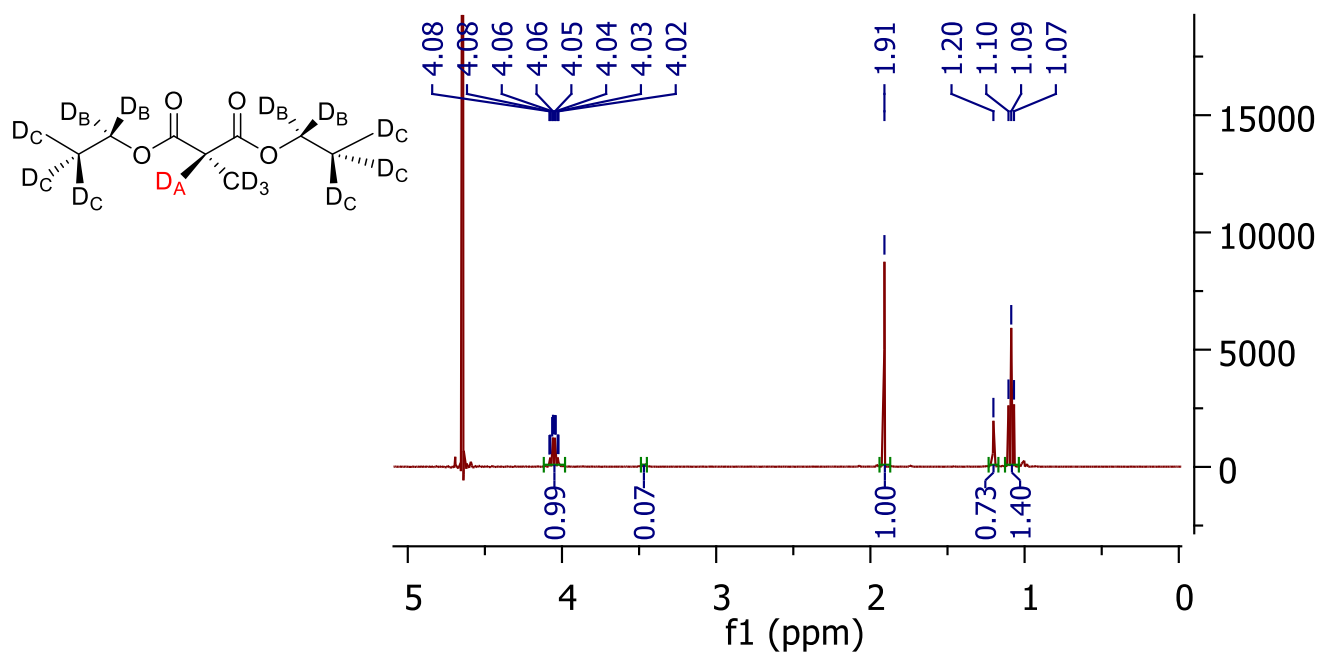

25mg Al (45% yield)

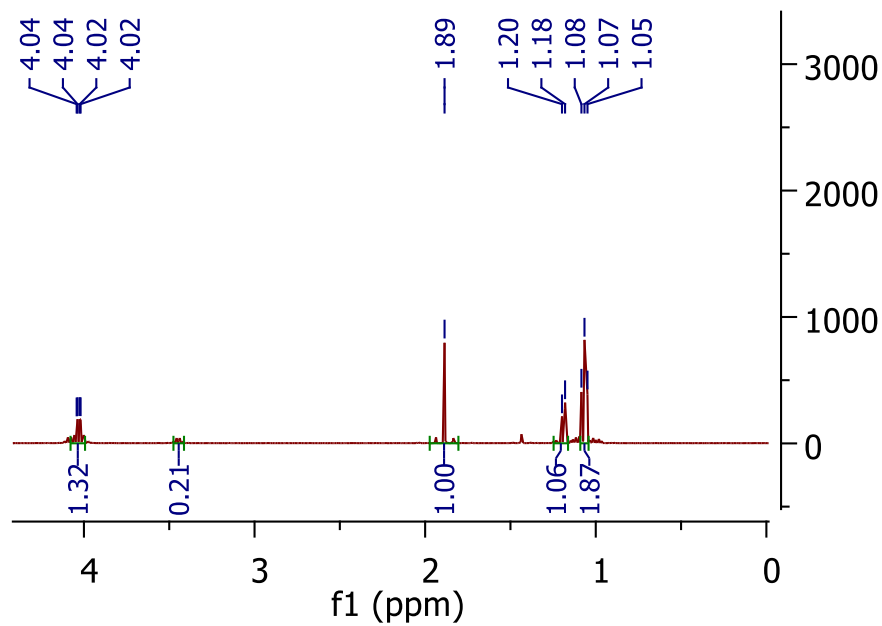

reference

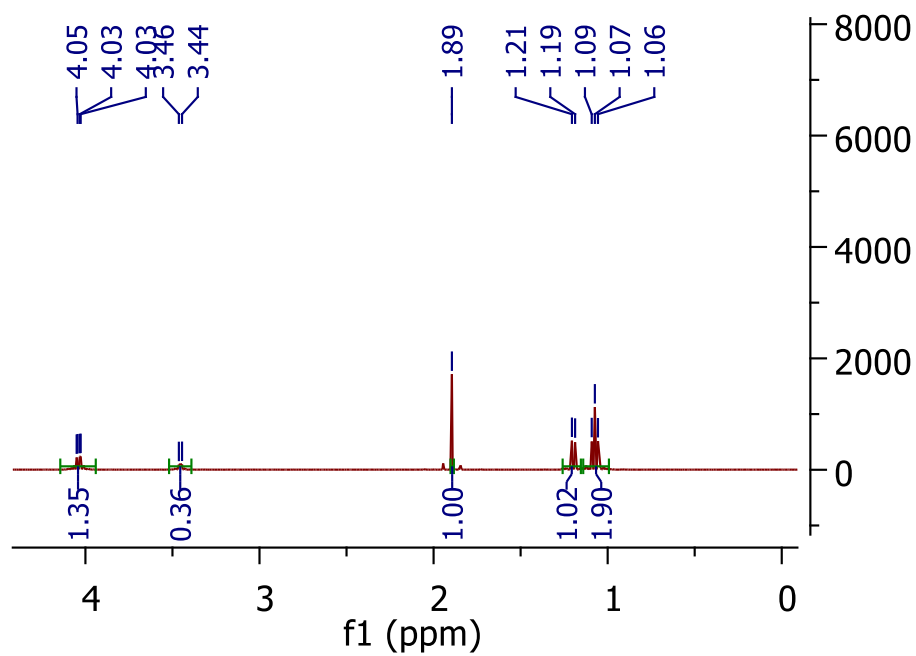



b.  $^2\text{H}$  NMR

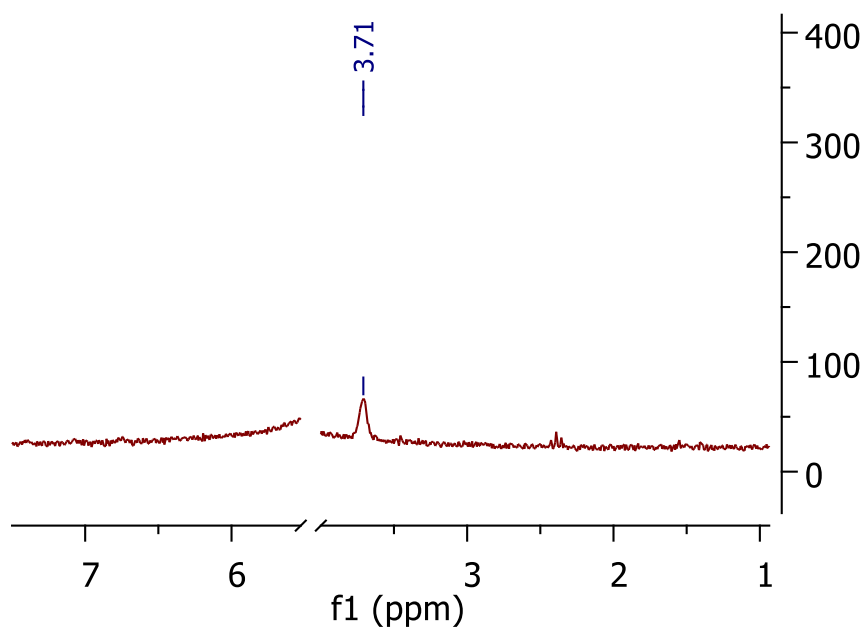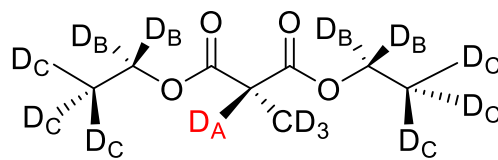

c. Mass spectrum

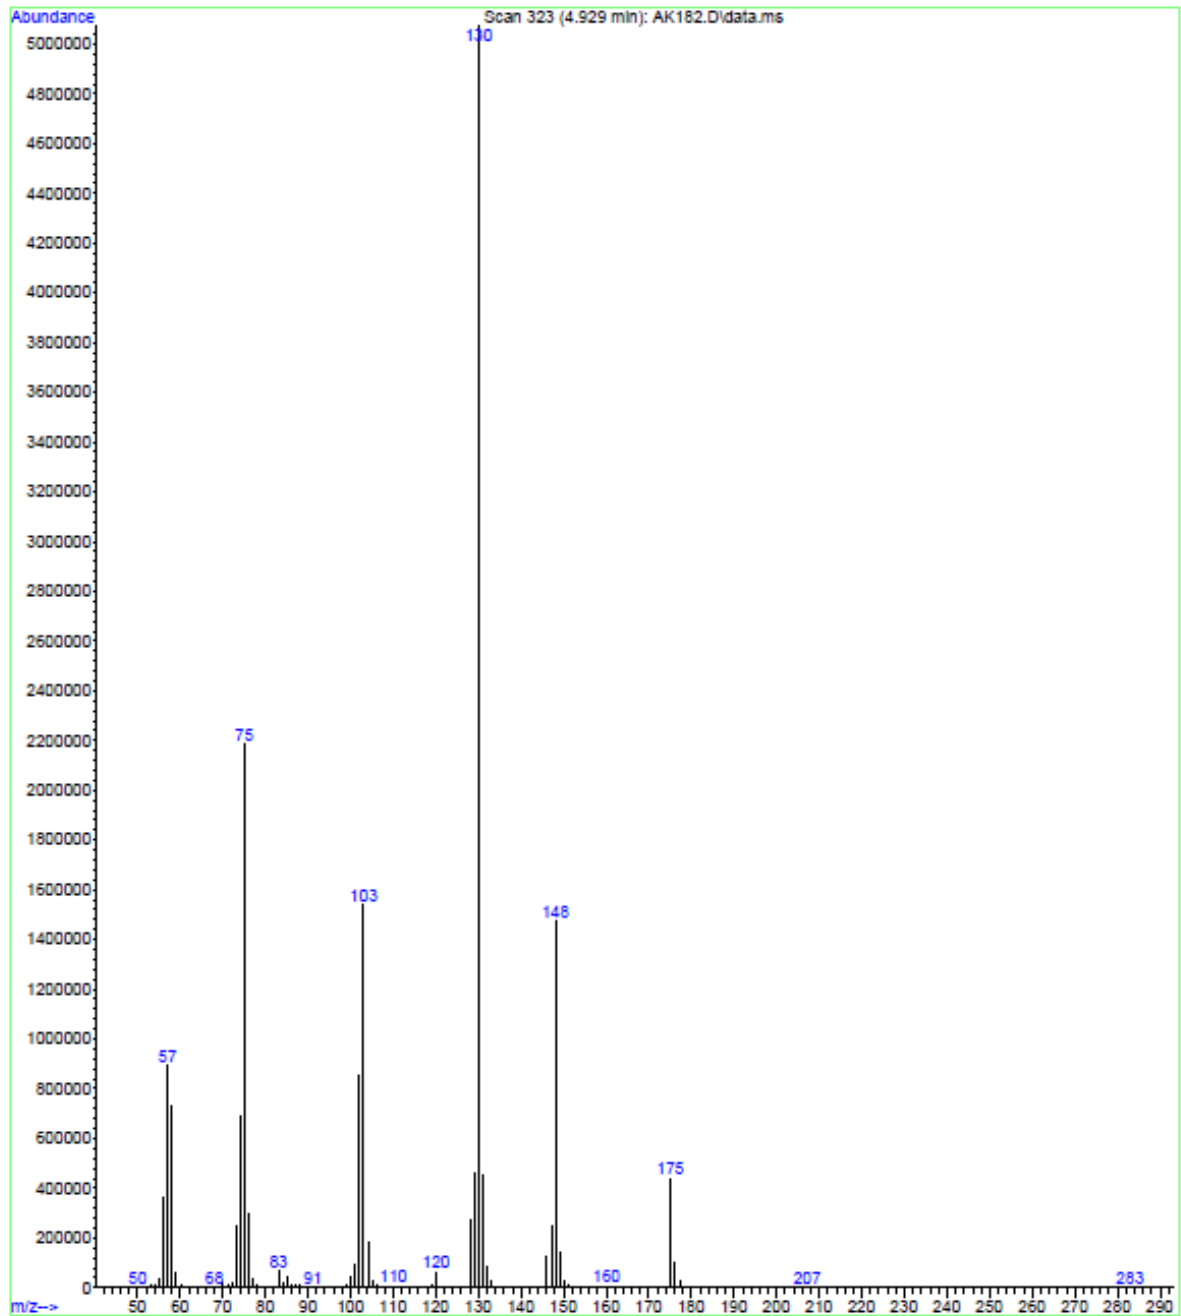

**Figure S21. H-D exchange reaction of 3,5-dihydroxybenzyl alcohol**

(20mg of Pd/C, MW, 60min, 120°C)

**a.  $^1\text{H}$  NMR**

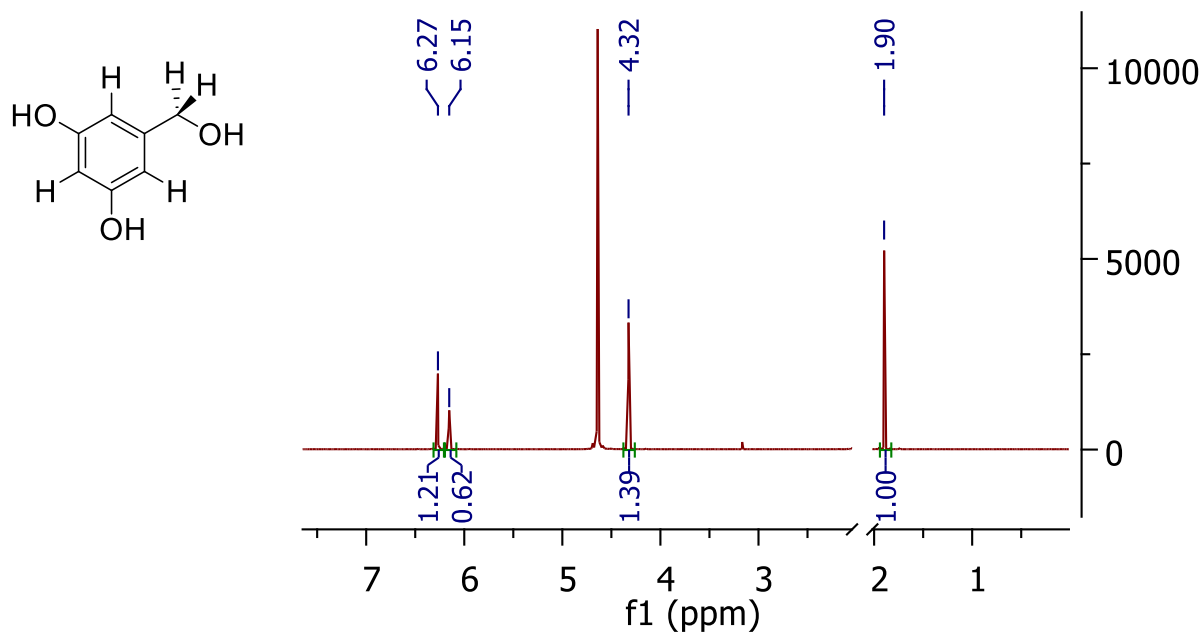

100mg Al

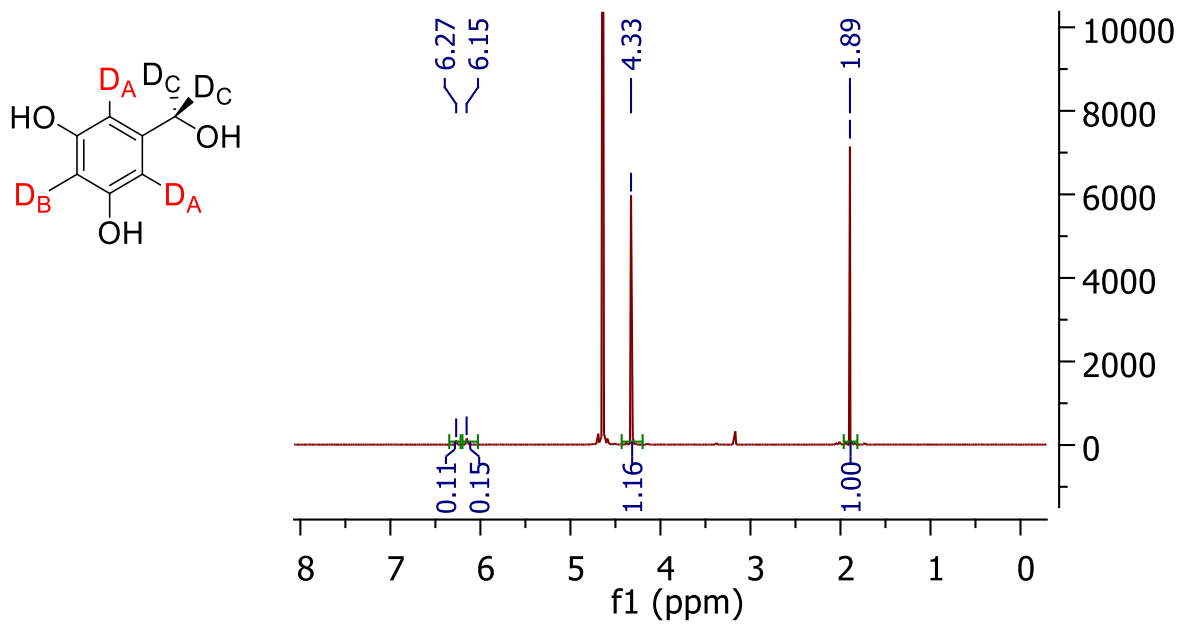

25mg Al (same yield)

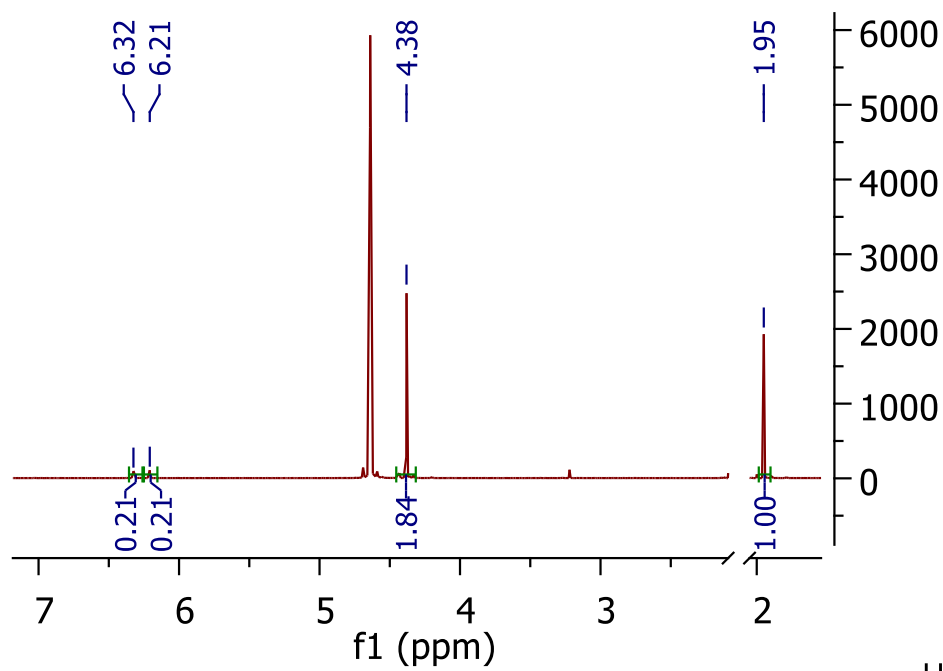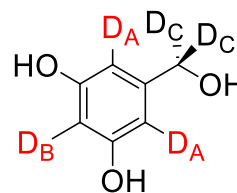

b. <sup>2</sup>H NMR

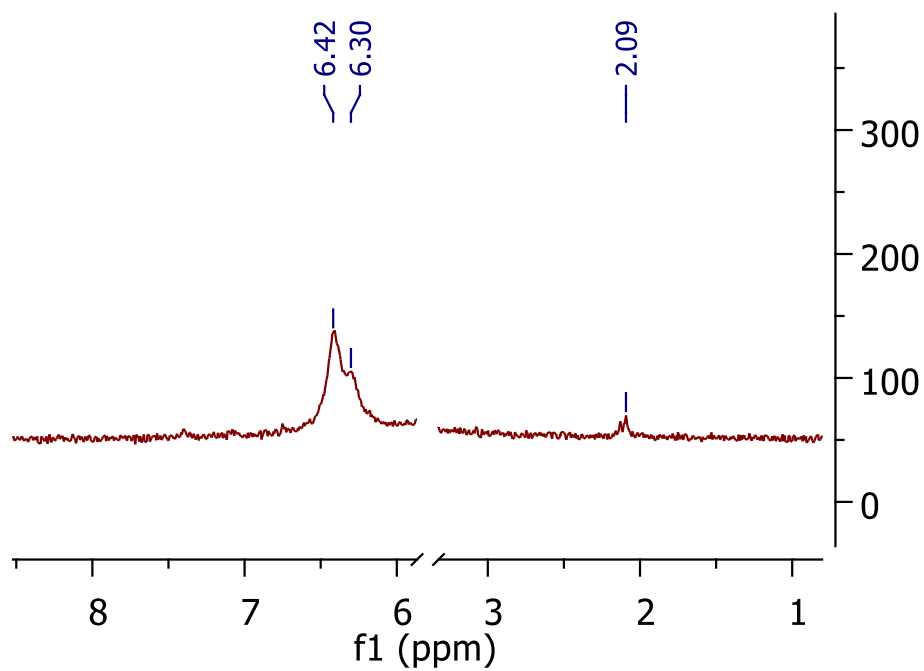

c. Mass spectrum

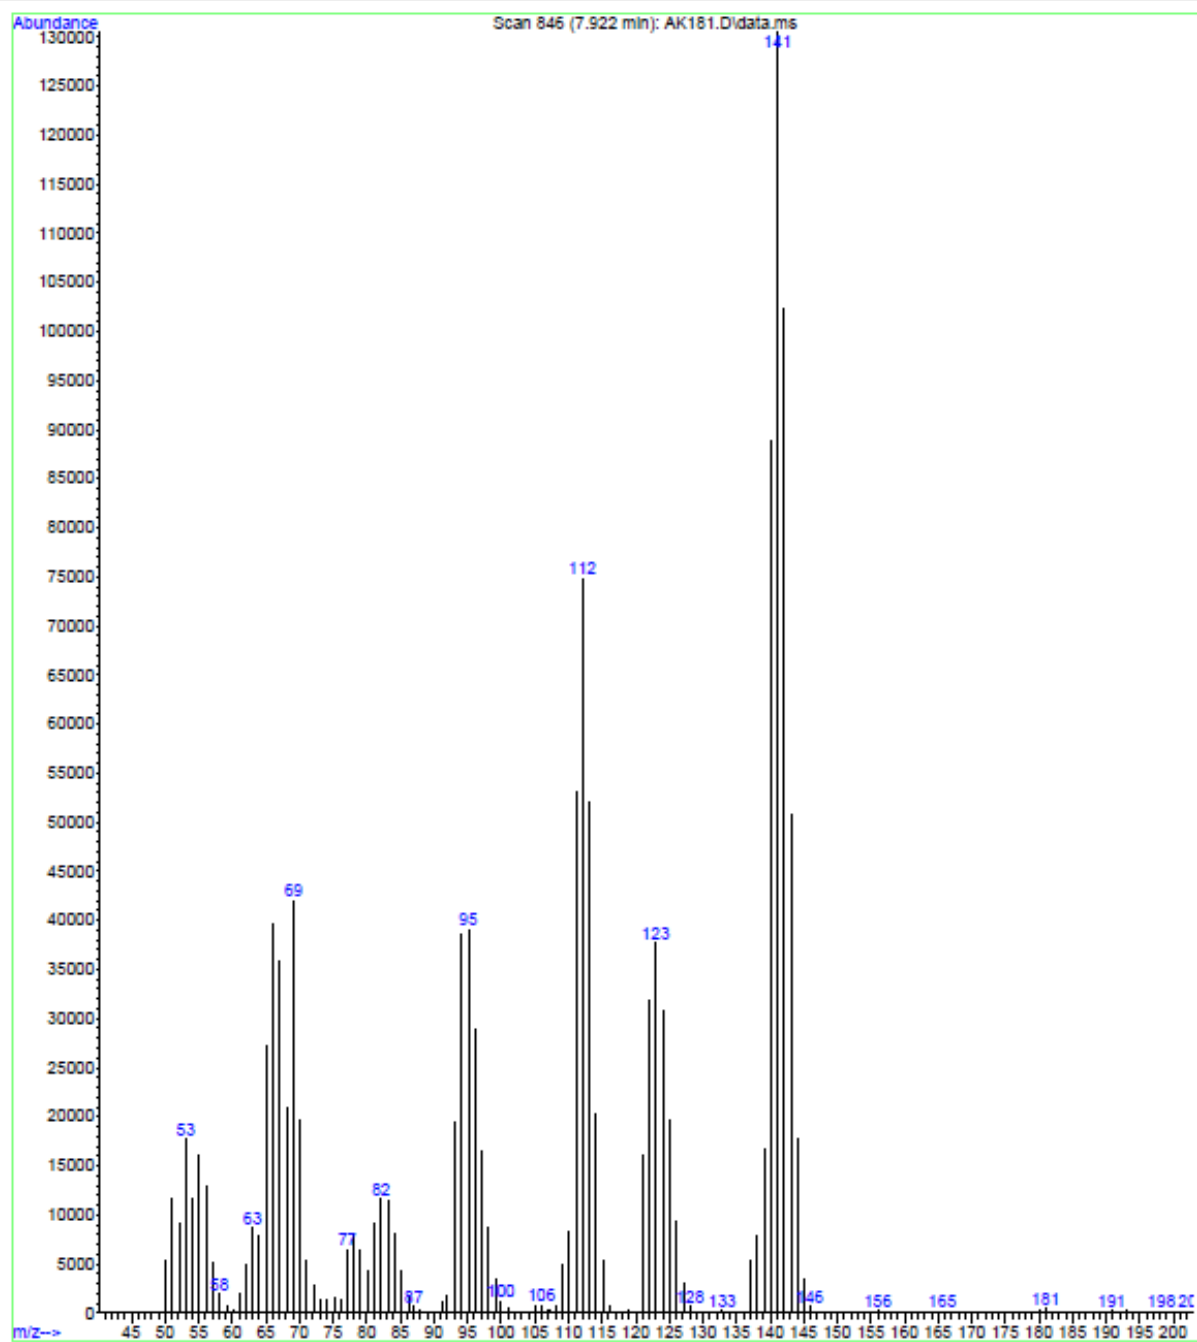

Figure S22. Recycling of the catalytic system

Reference

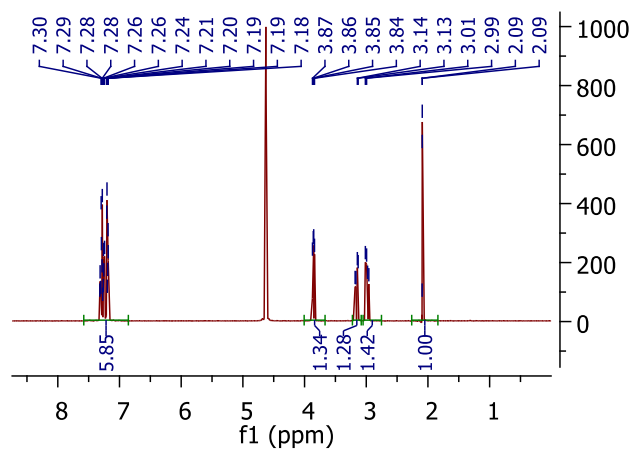

First cycle

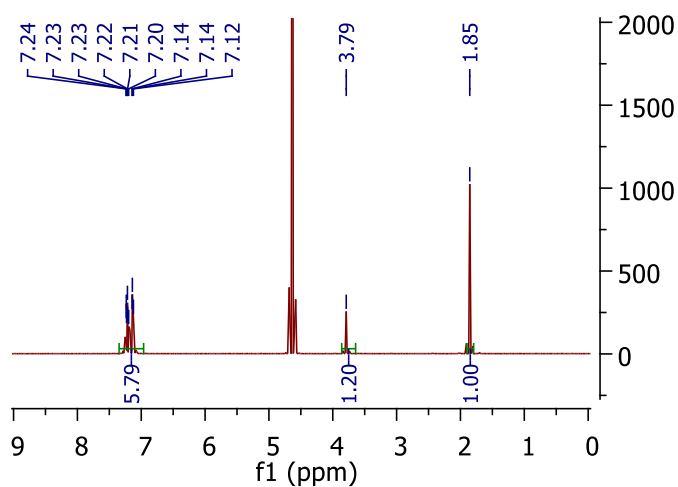

Second cycle

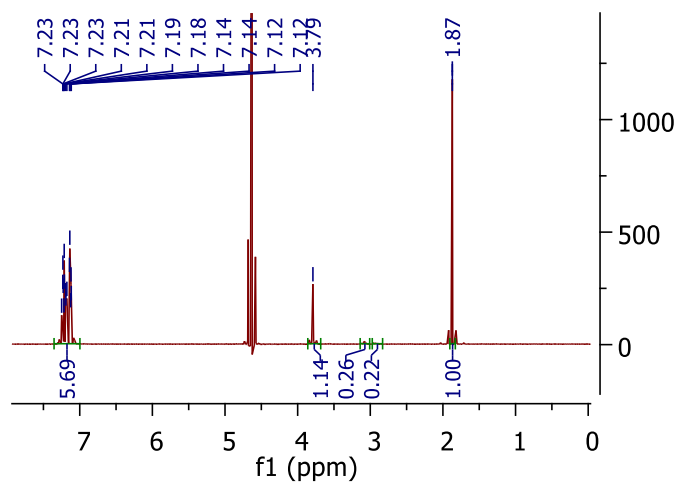

Third cycle

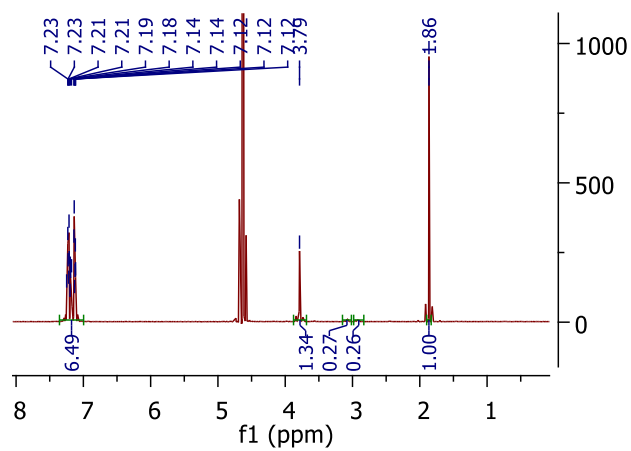

Fourth cycle

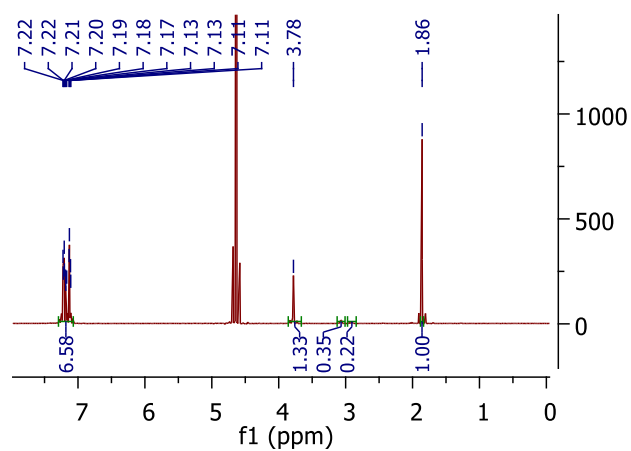

Fifth cycle

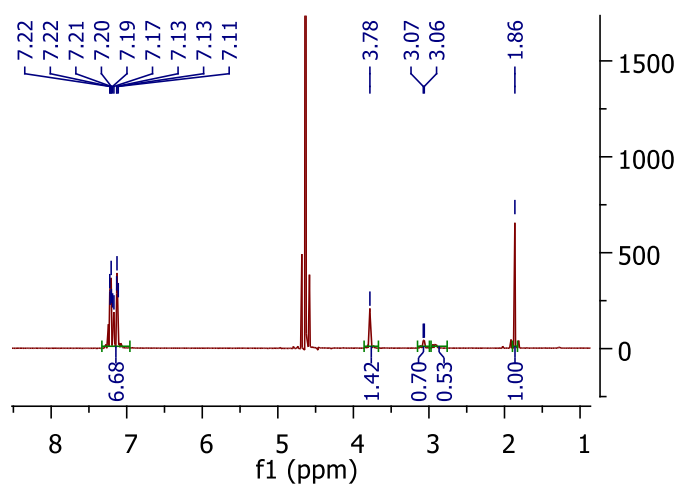

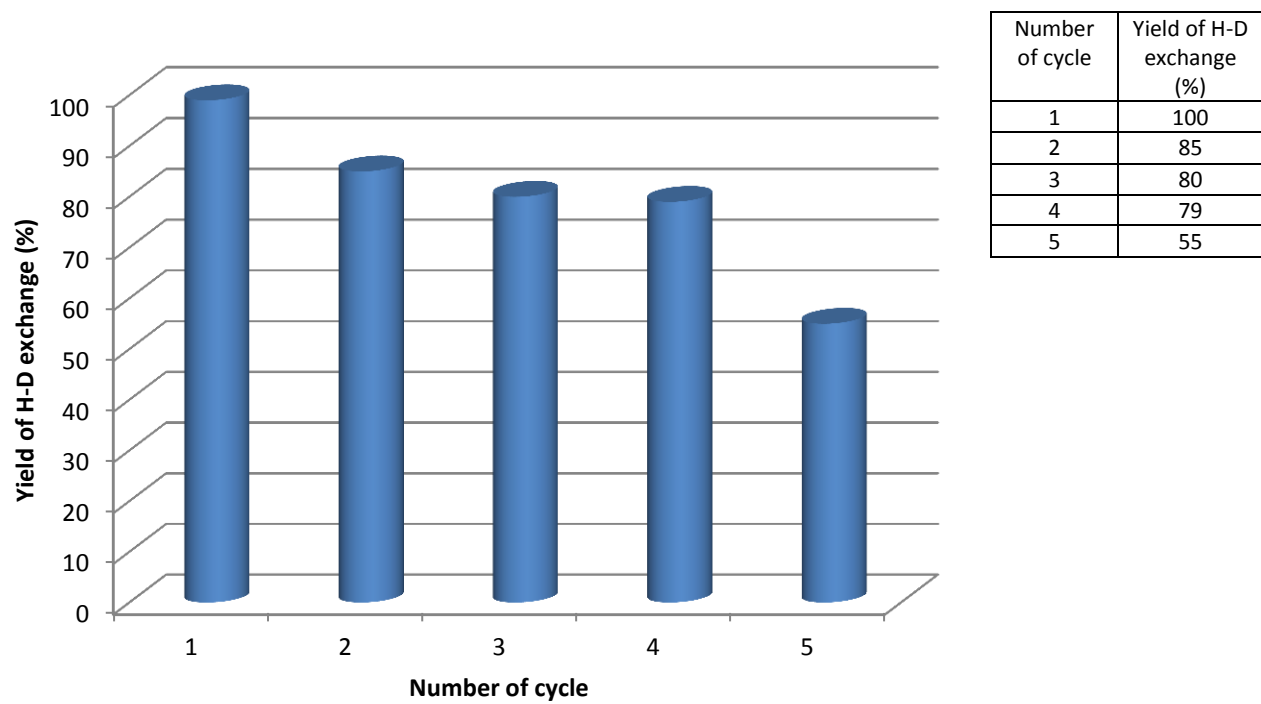

*Figure S23. %yield of H-D exchange for five consecutive reaction cycles*
